# Supplementary material for: Origins and Timing of Emerging Lesions in Advanced Renal Cell Carcinoma
Source: PubMed Central journal article supplement — Mol Cancer Res. 2022 Mar 17;20(6):909–22. doi: 10.1158/1541-7786.MCR-21-0590 (PMC9381131; doi:10.1158/1541-7786.mcr-21-0590), 2022-03-17
Supplement: mcr-21-0590_supplementary_figures_1-30_suppsf1-30.pdf [file mcr-21-0590_supplementary_figures_1-30_suppsf1-30.pdf]

# Supplementary Figures

**Figure S1.**

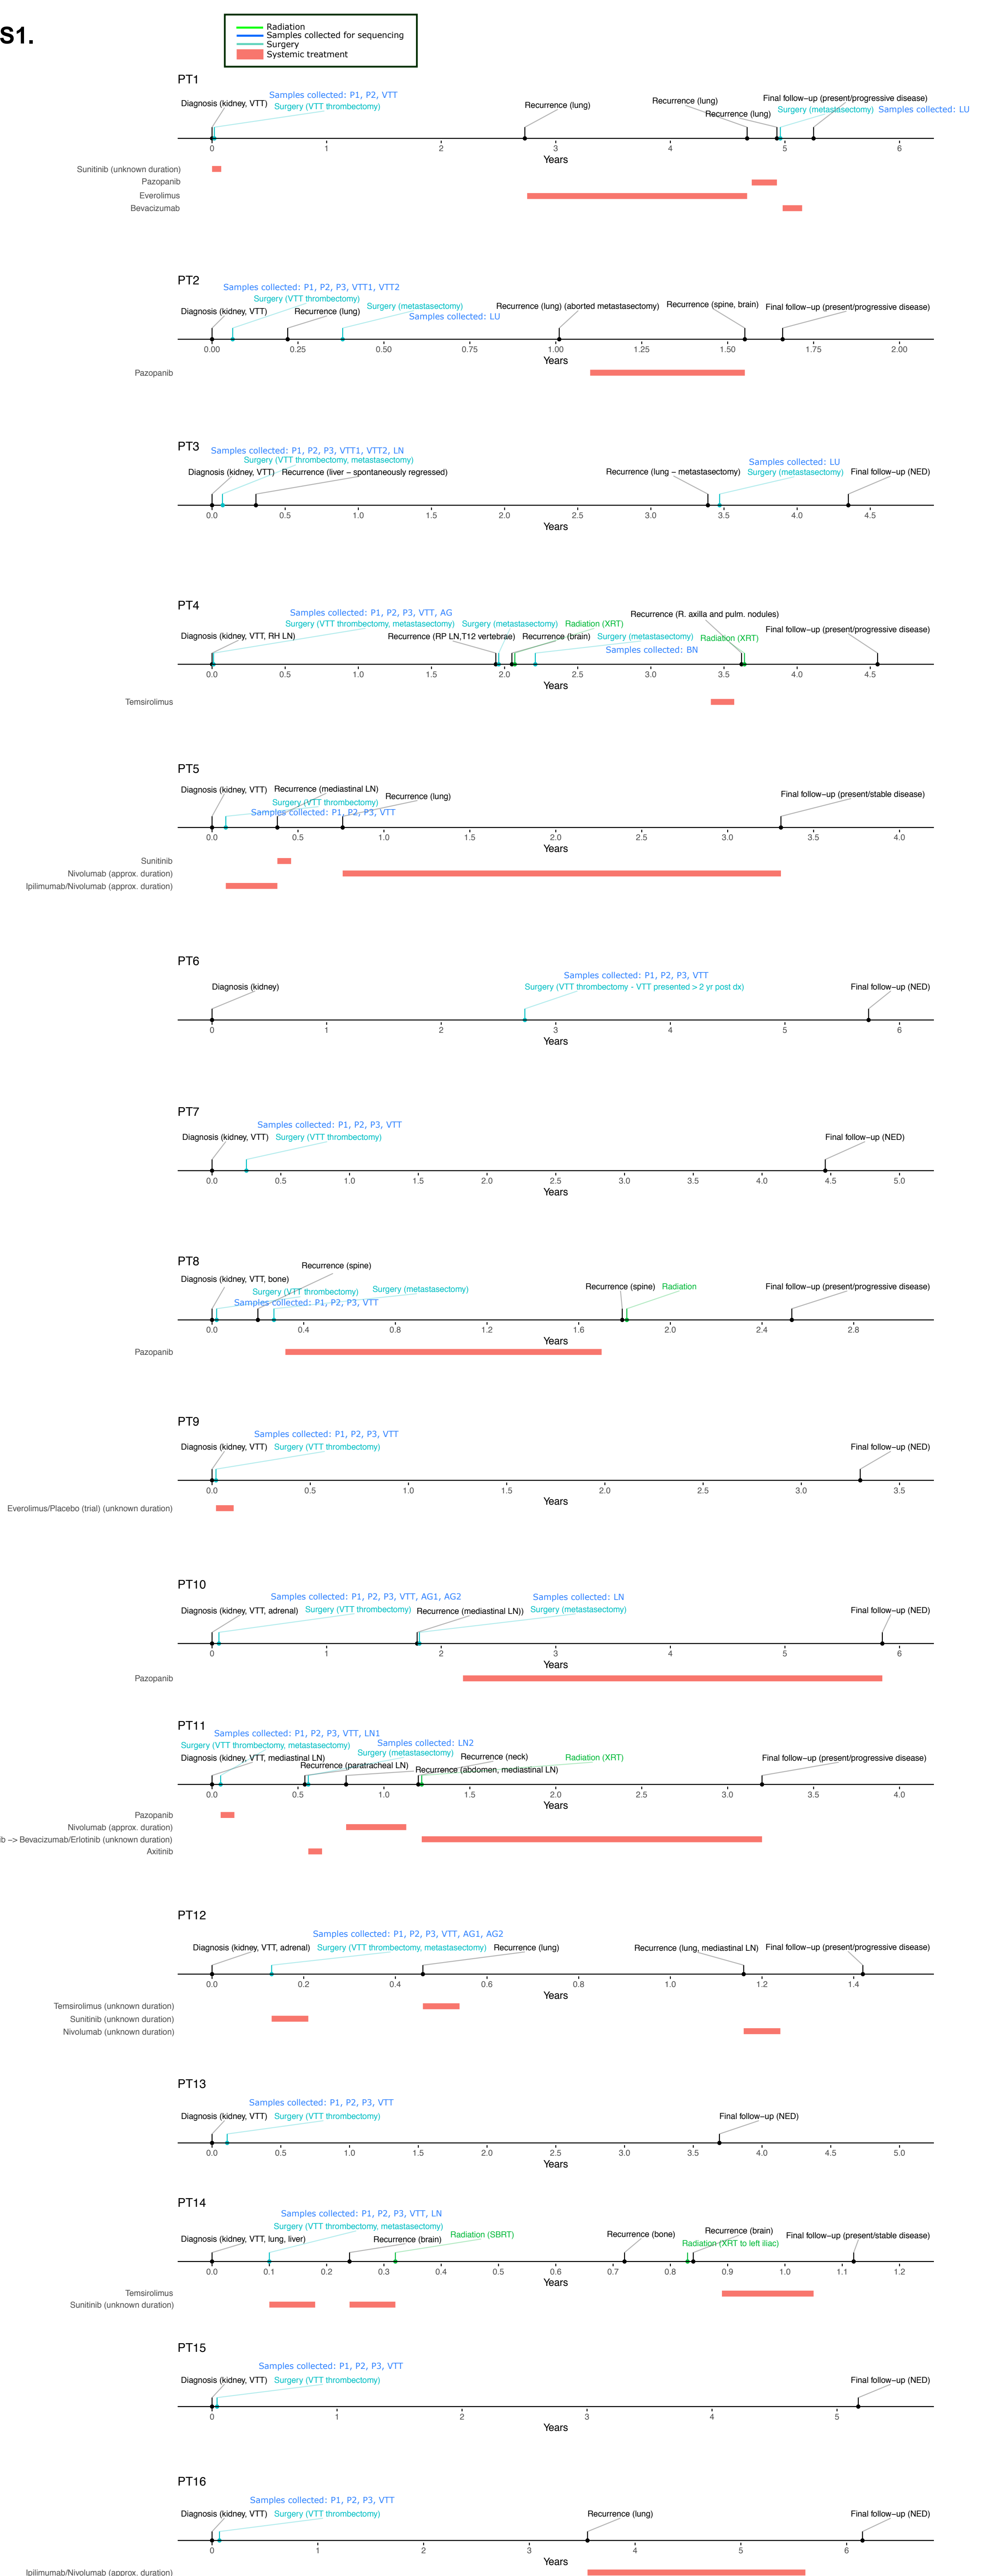

**Figure S1.** Timelines of patient diagnosis, surgeries, and other treatment.

**Figure S2.**

Low

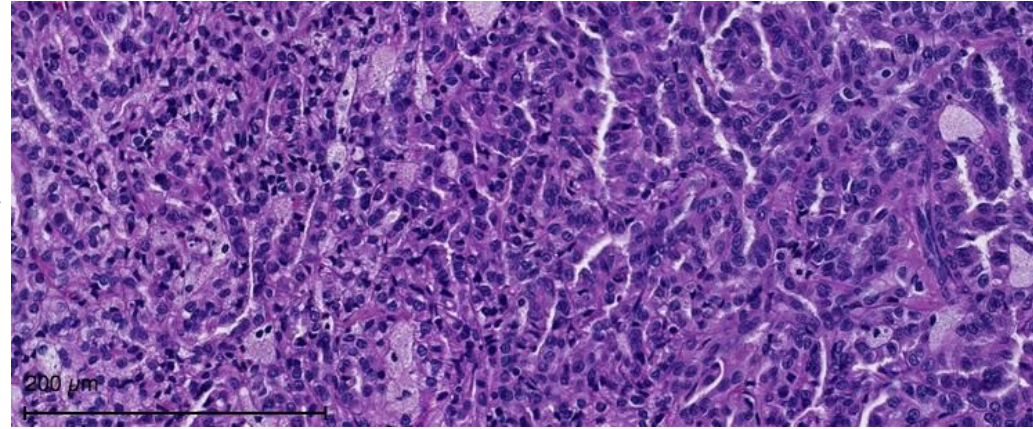

Moderate

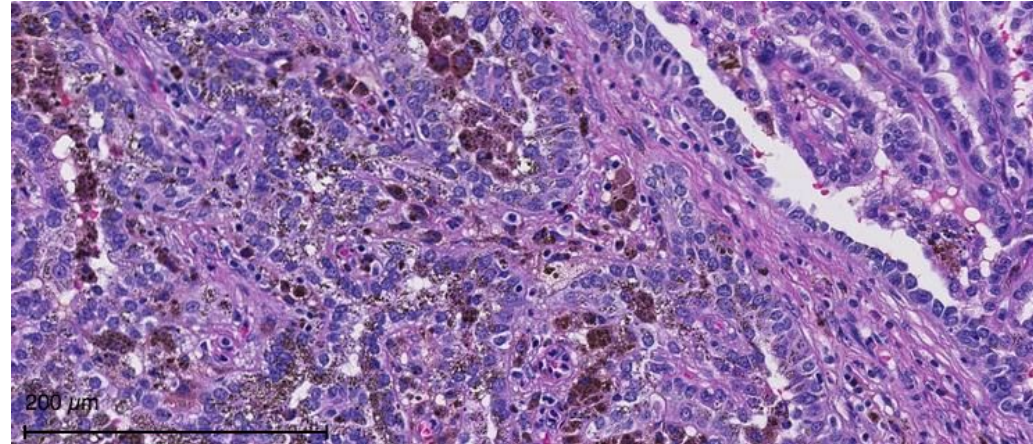

High

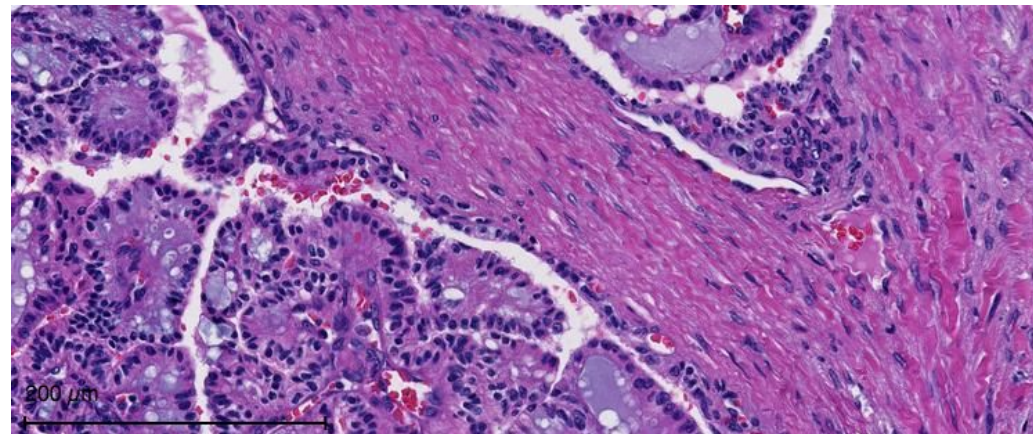



**Figure S2:** Semi-quantitative analysis of stromal abundance captured 3 levels (low, moderate or high) of stromal presence within tumors with little inflammatory response.

# Figure S3.

**A**

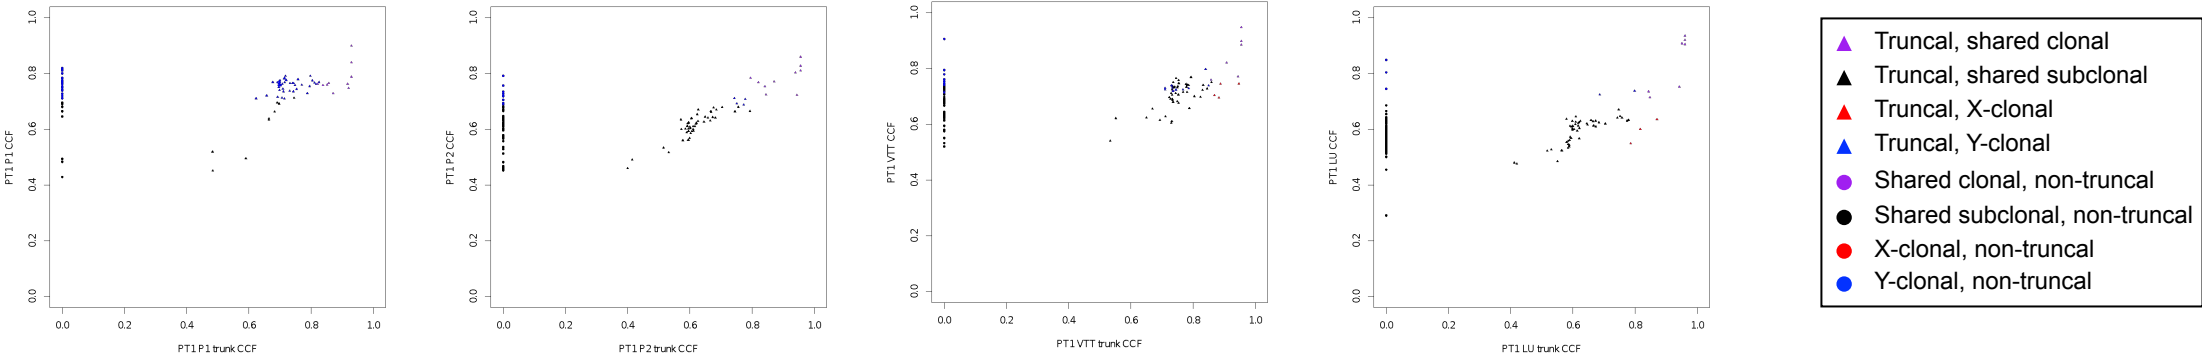

**B**

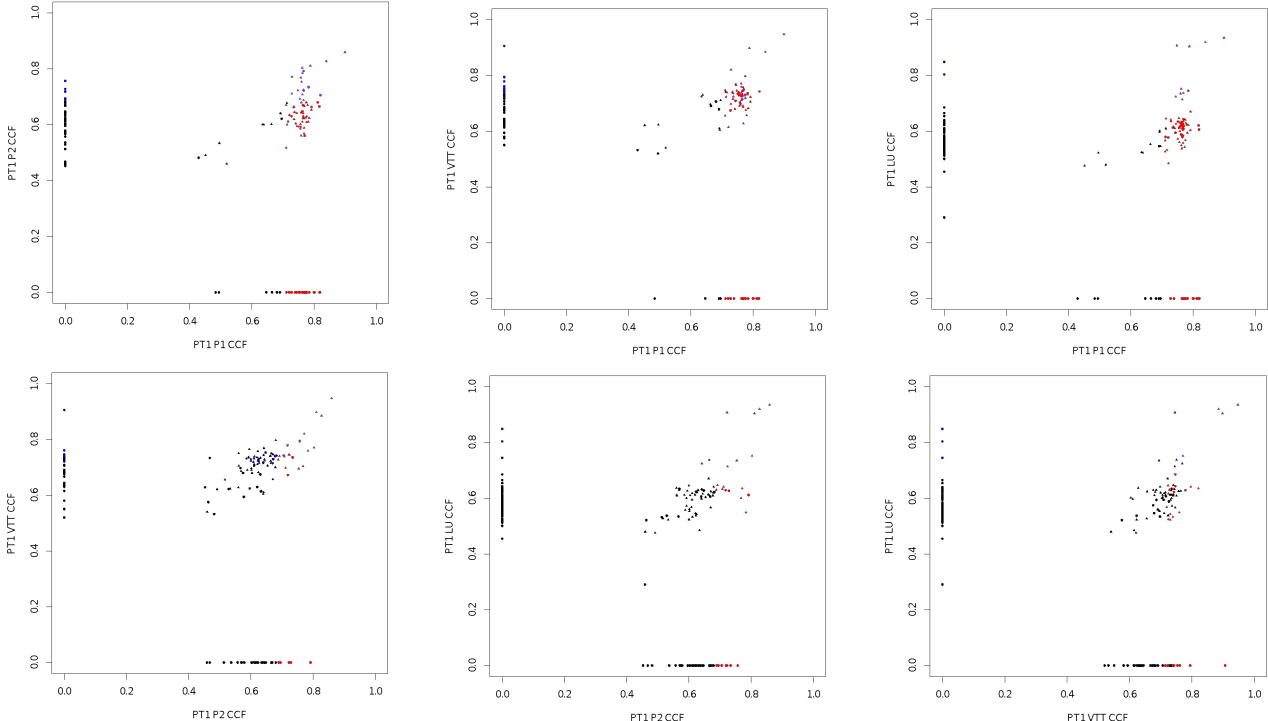

**C**

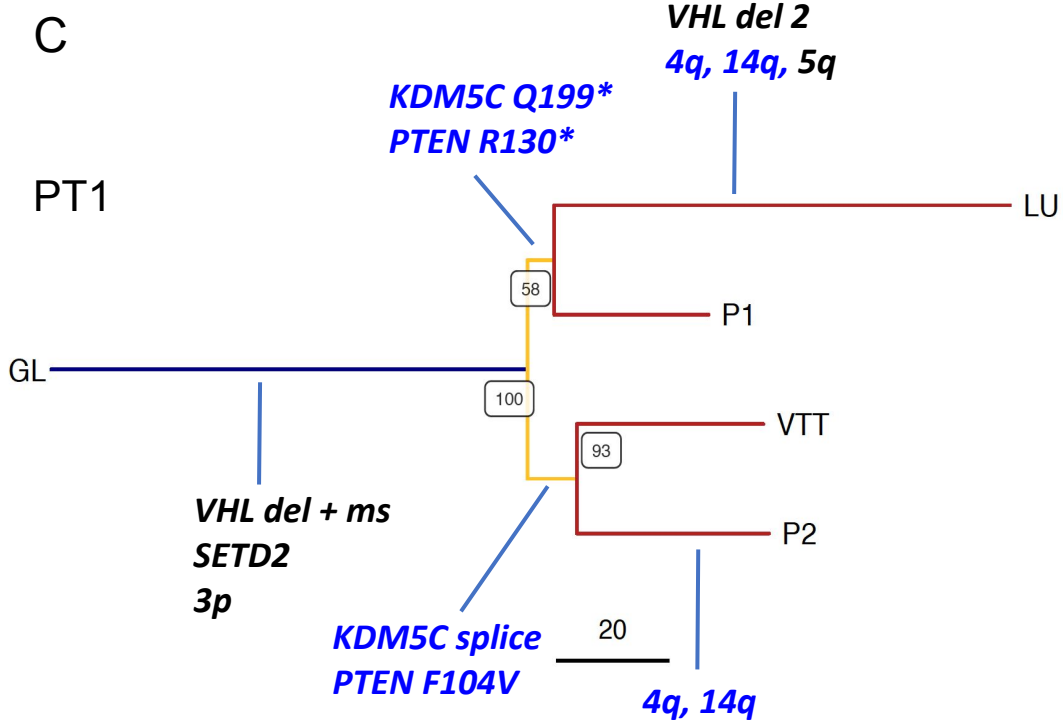

Figure S3.

D

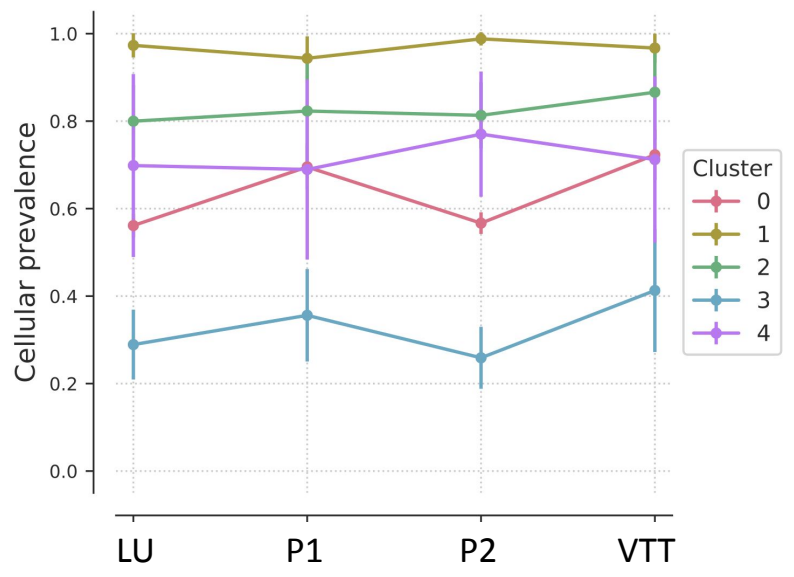

E

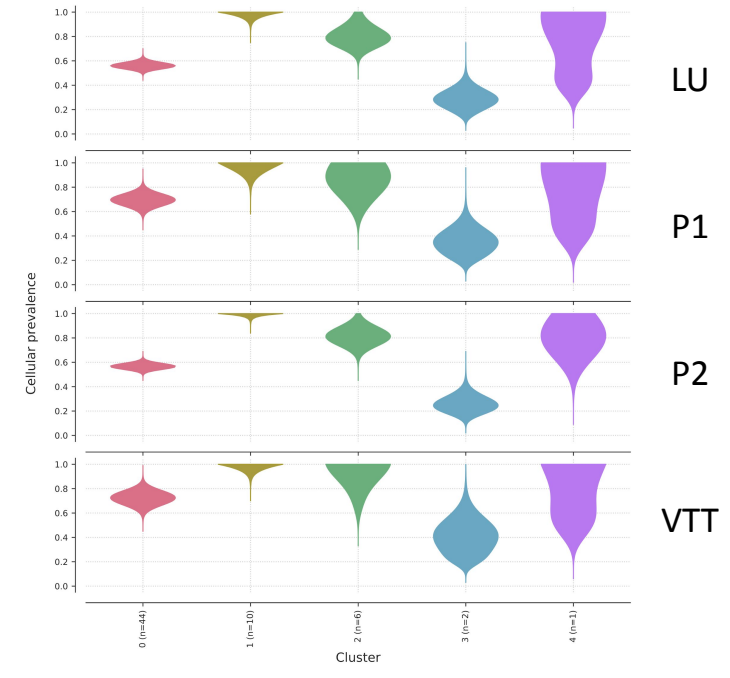

# Figure S4.

## A

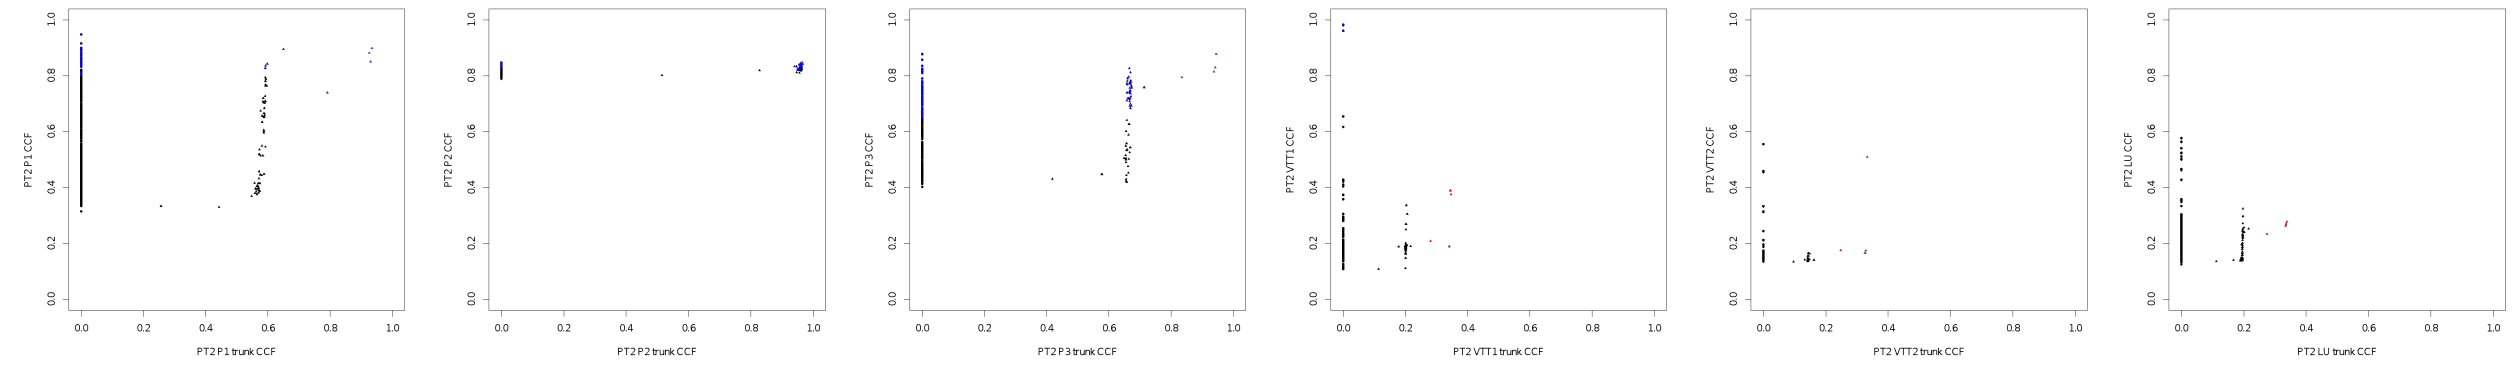

## B

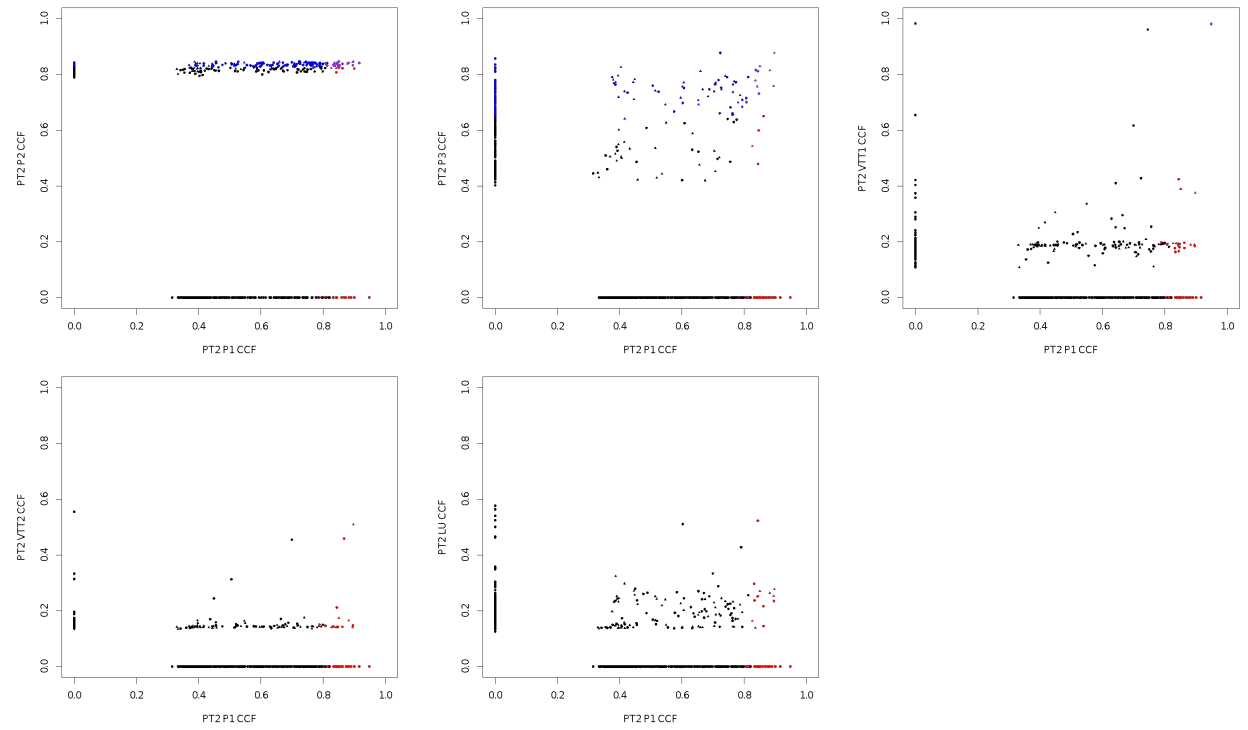

- ▲ Truncal, shared clonal
- ▲ Truncal, shared subclonal
- ▲ Truncal, X-clonal
- ▲ Truncal, Y-clonal
- Shared clonal, non-truncal
- Shared subclonal, non-truncal
- X-clonal, non-truncal
- Y-clonal, non-truncal



# Figure S4.

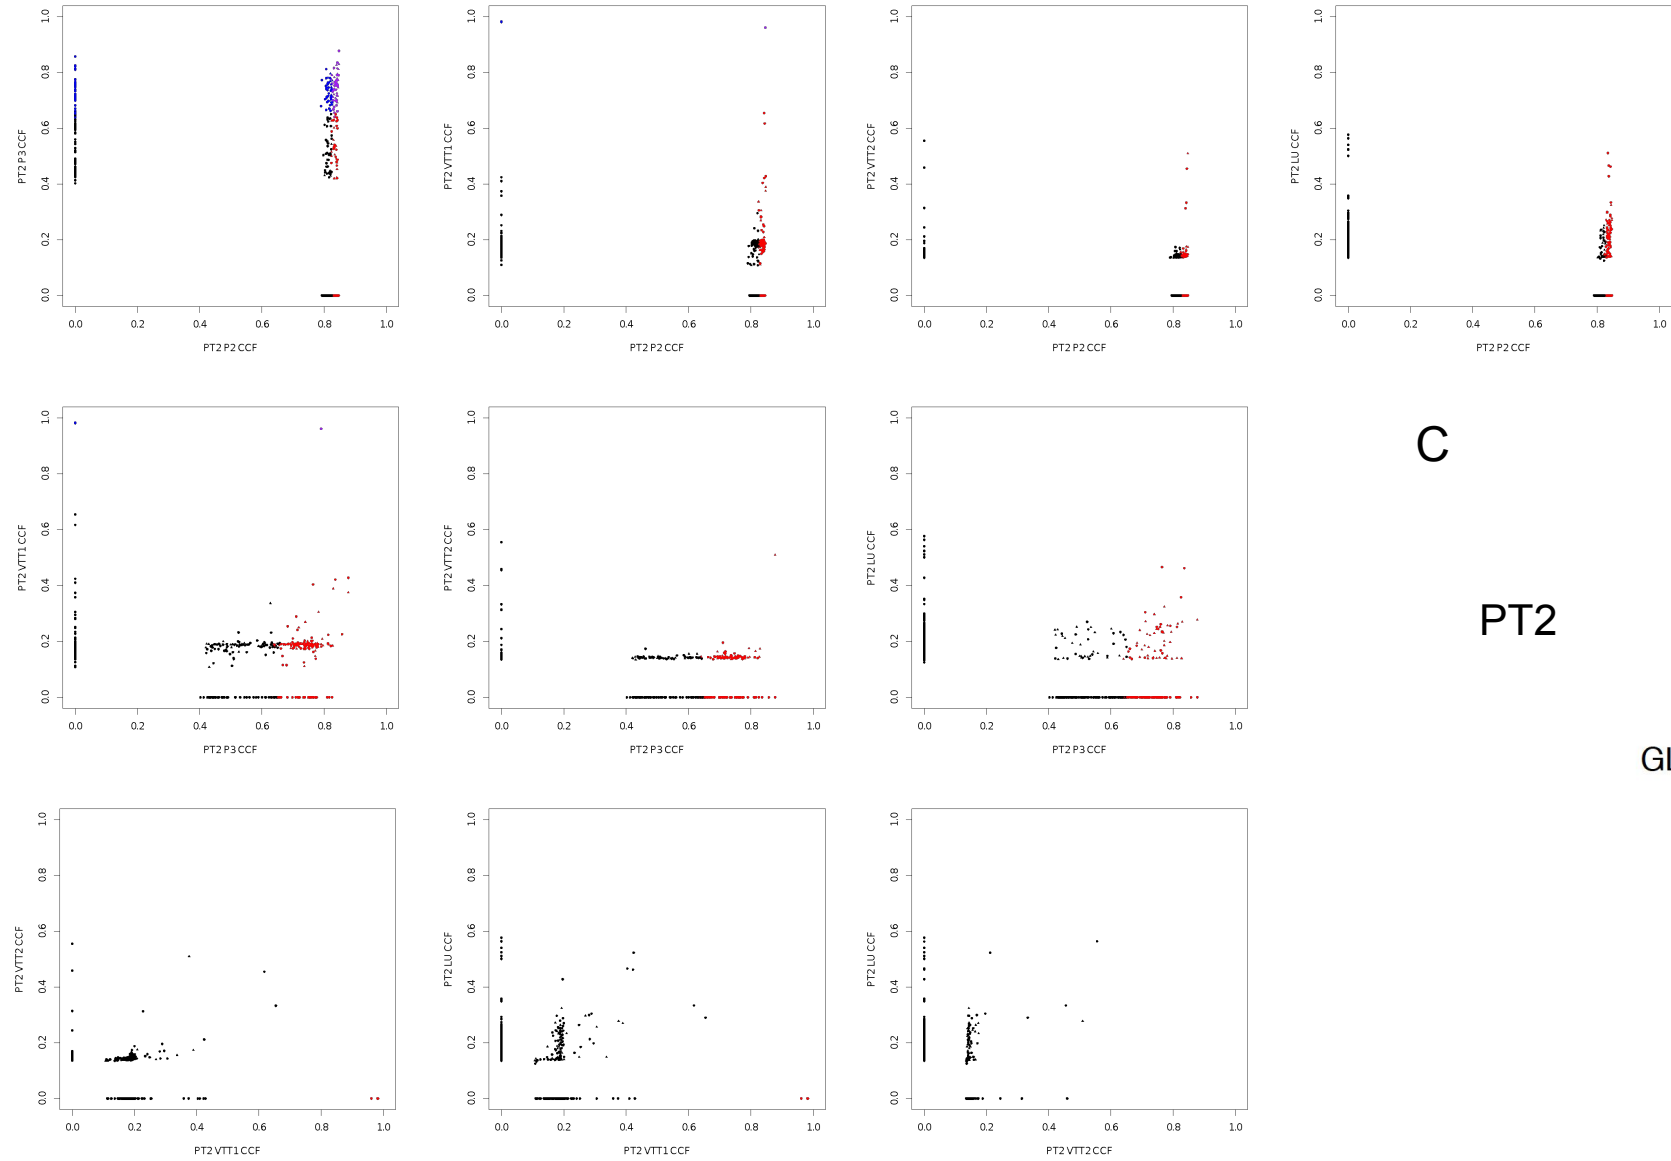

C

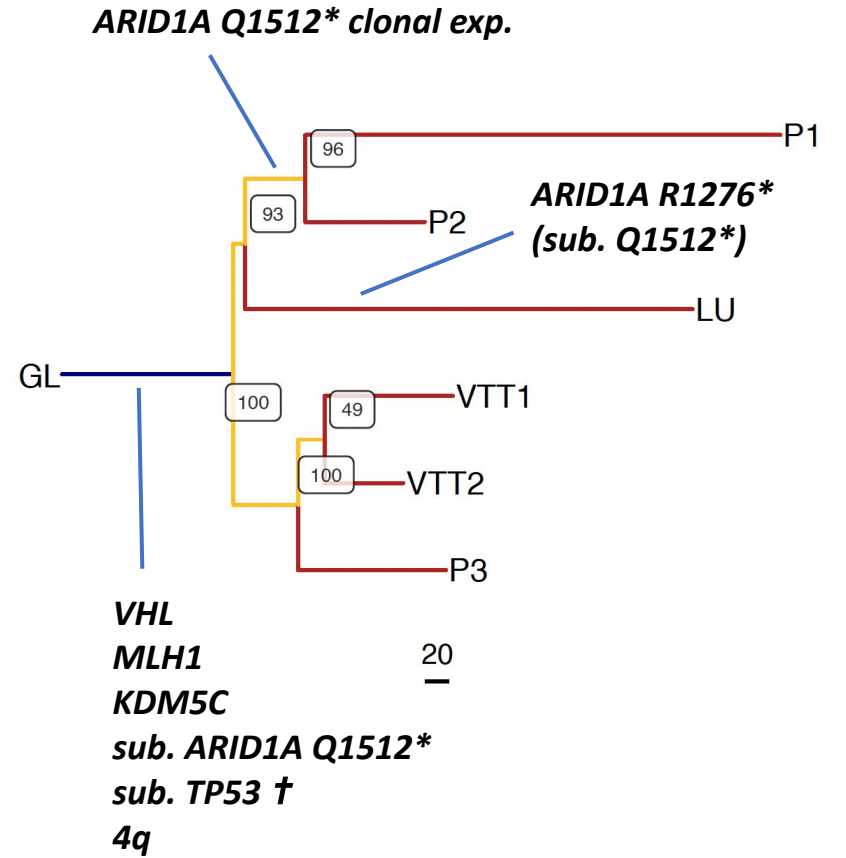

**Figure S4.**

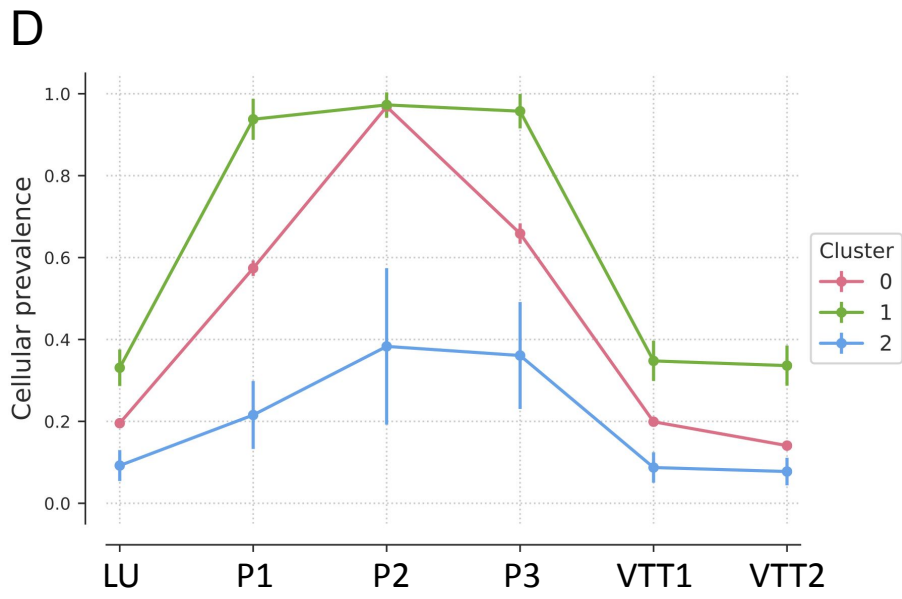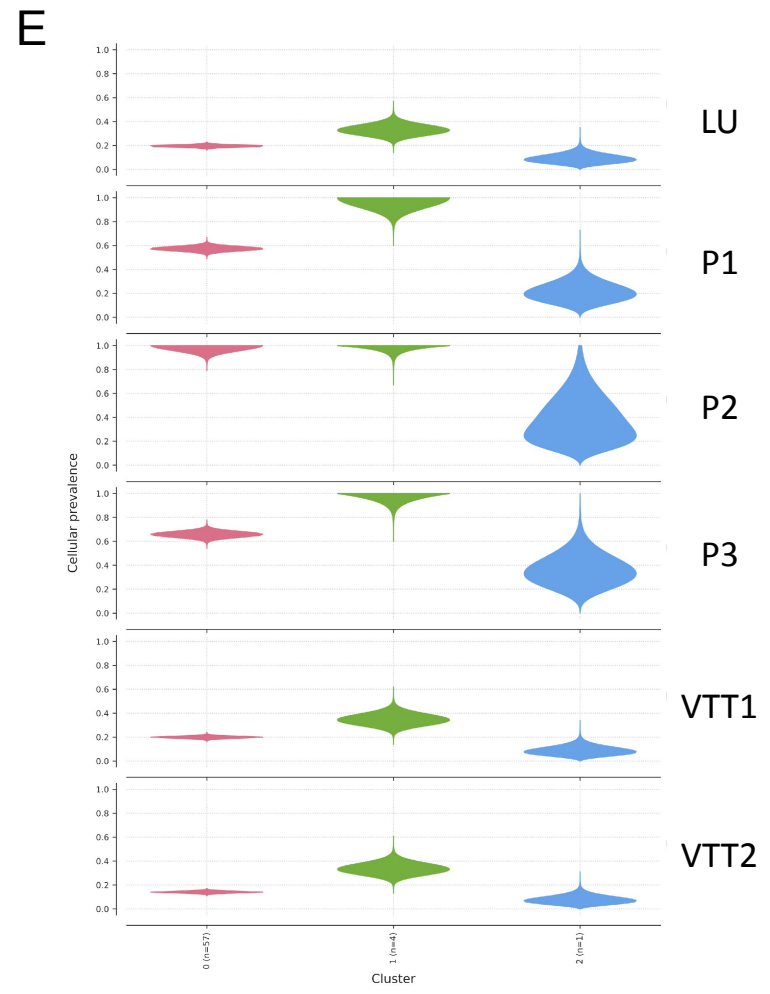

# Figure S5.

A

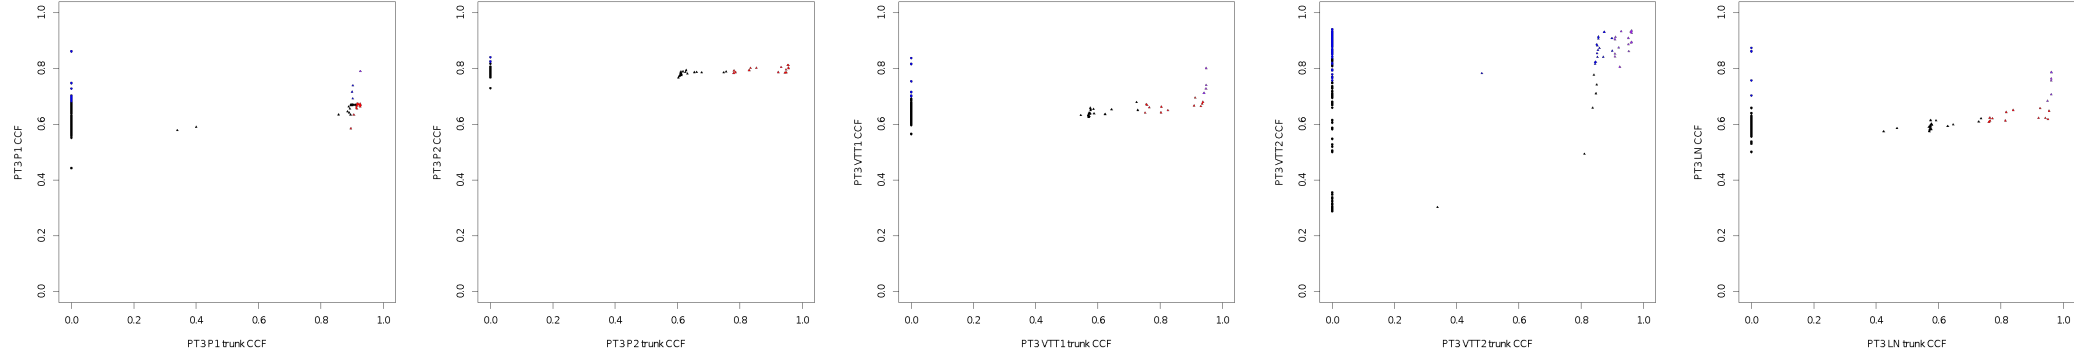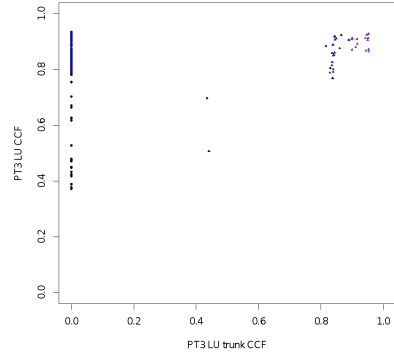

B

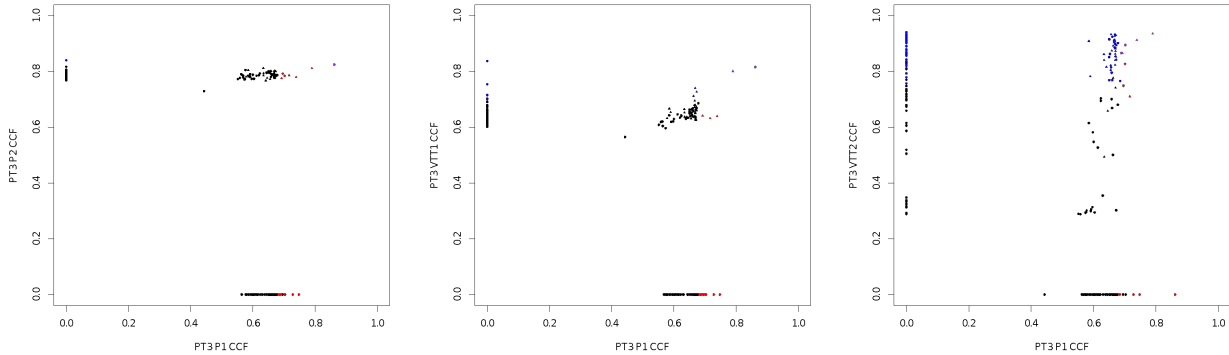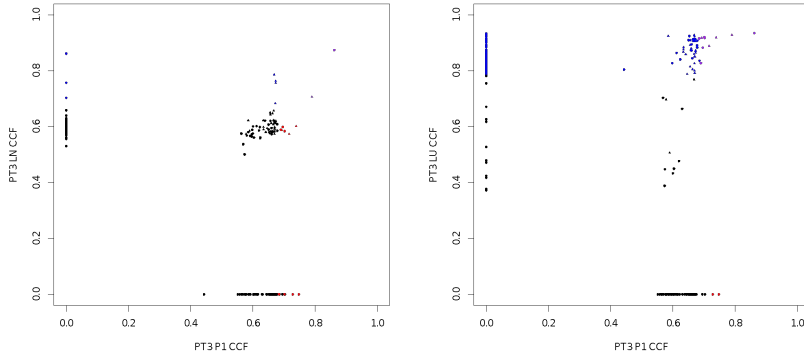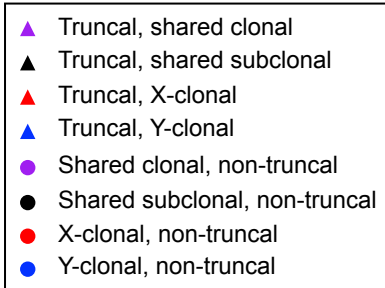

**Figure S5.**

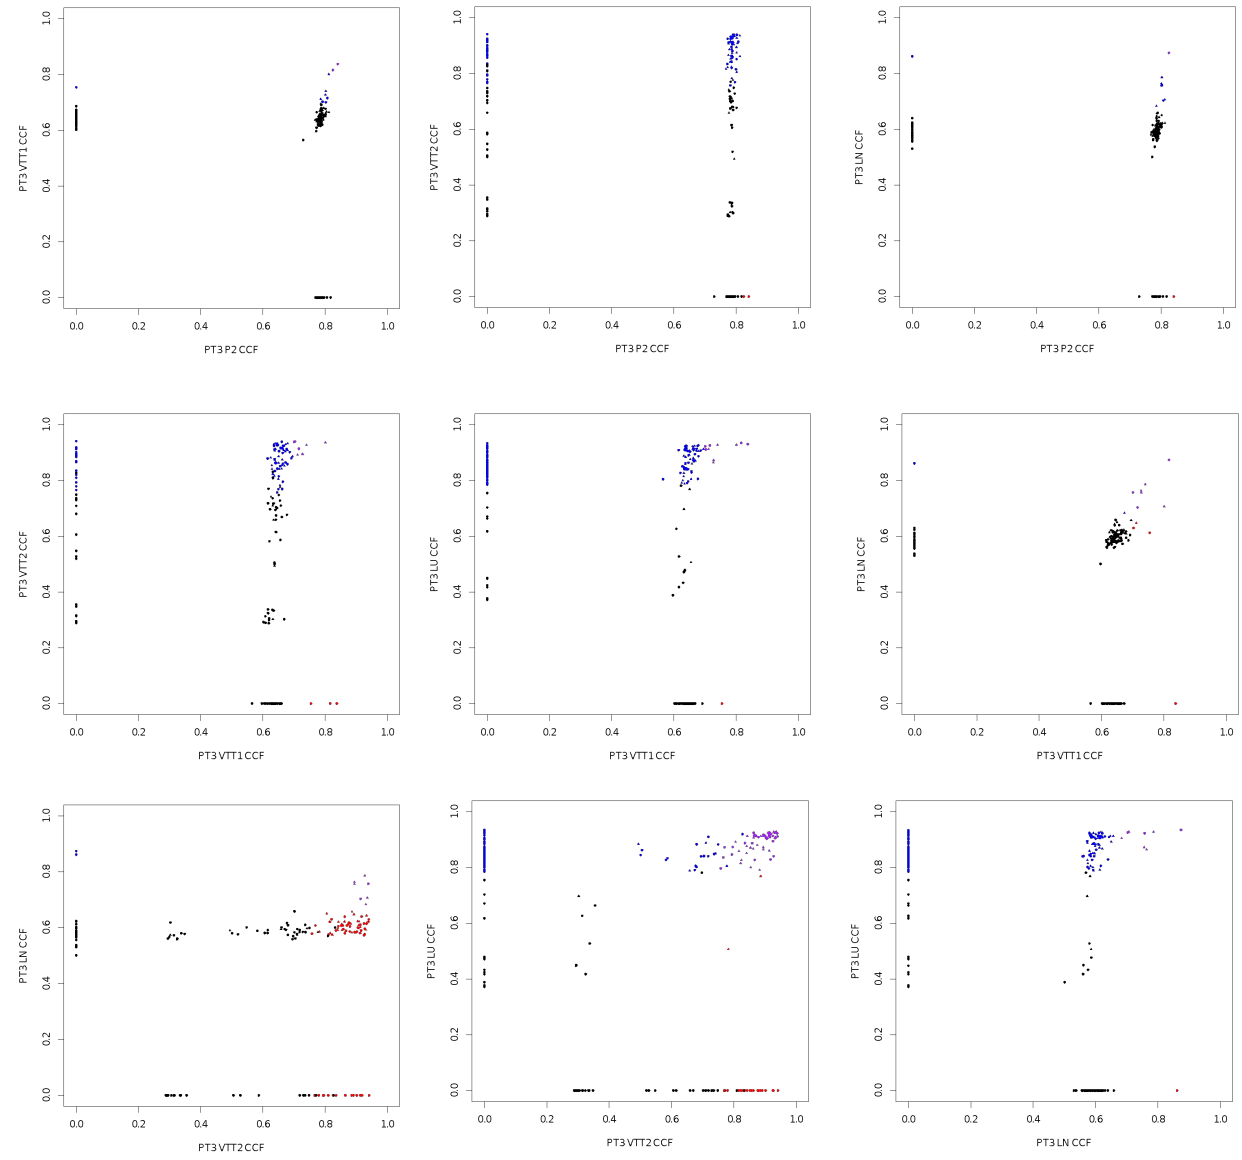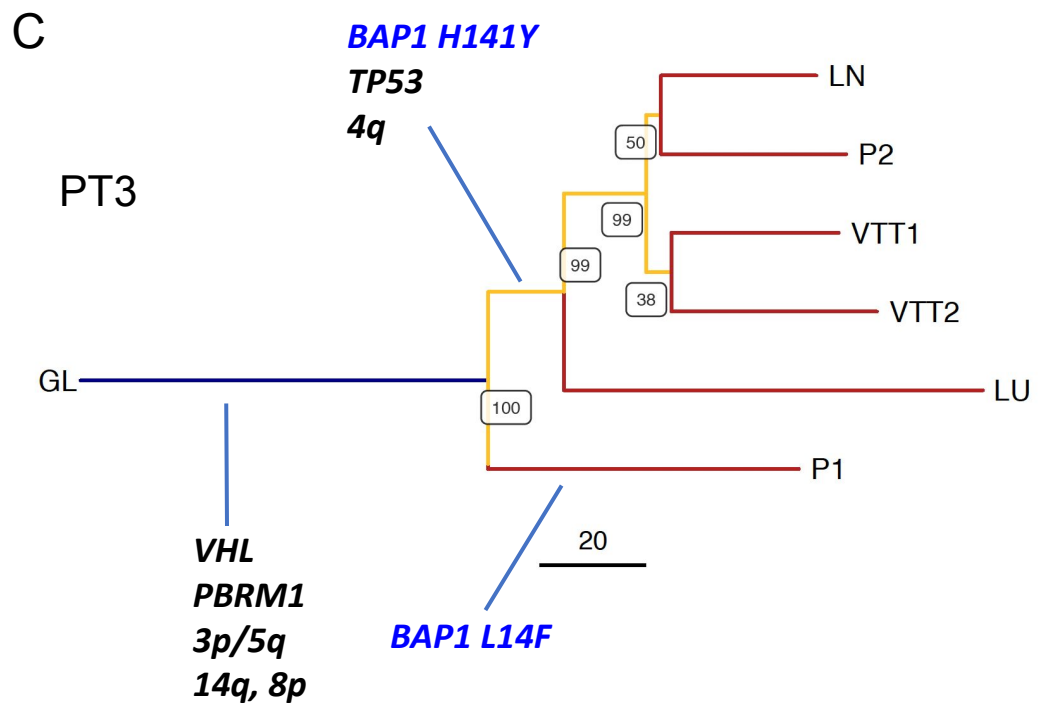



Figure S5.

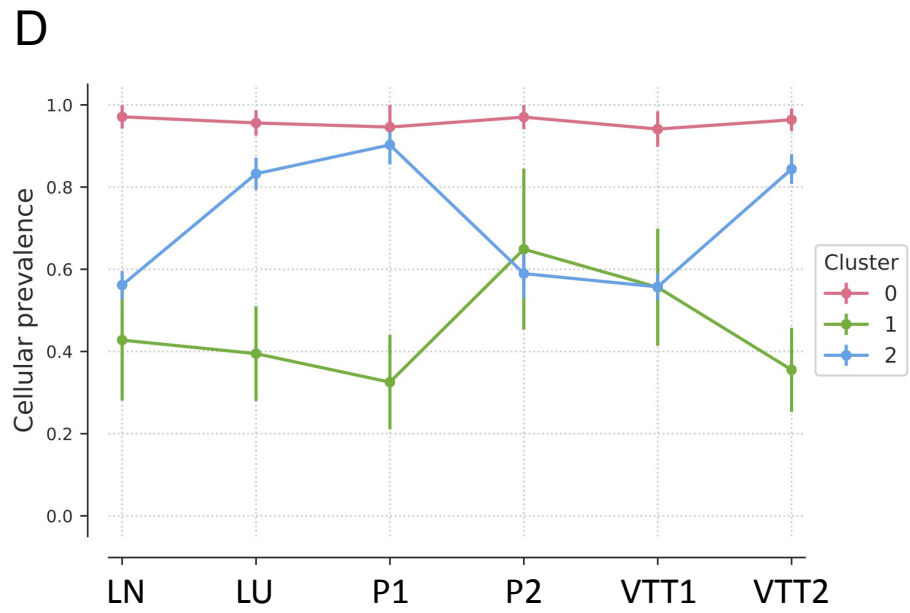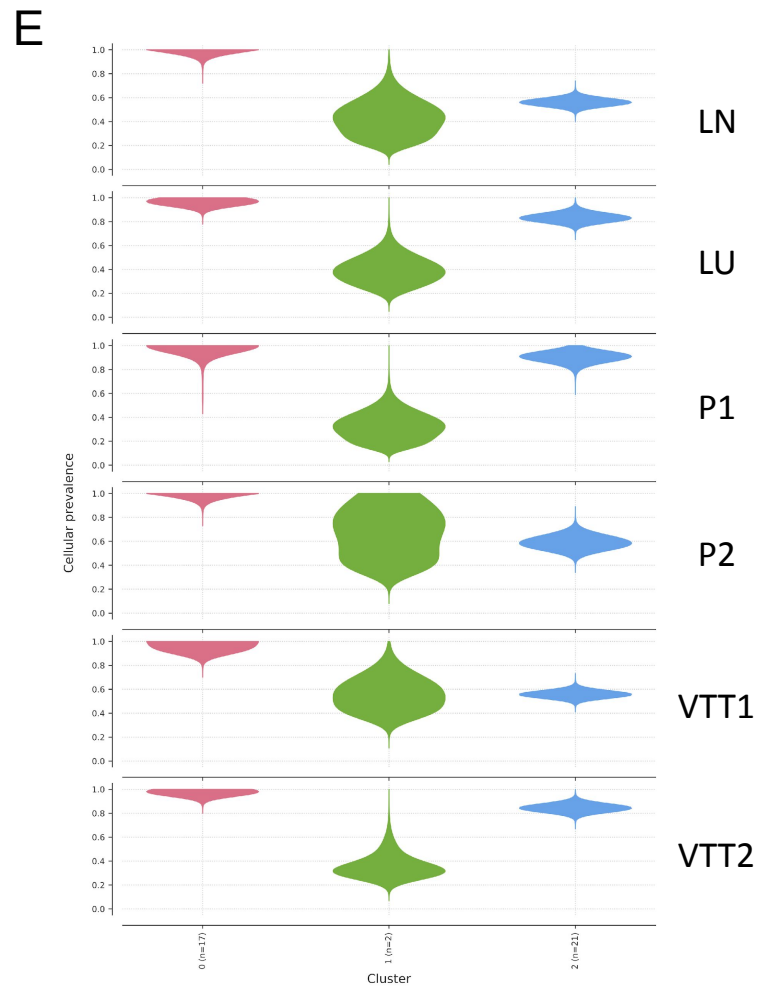

# Figure S6.

## A

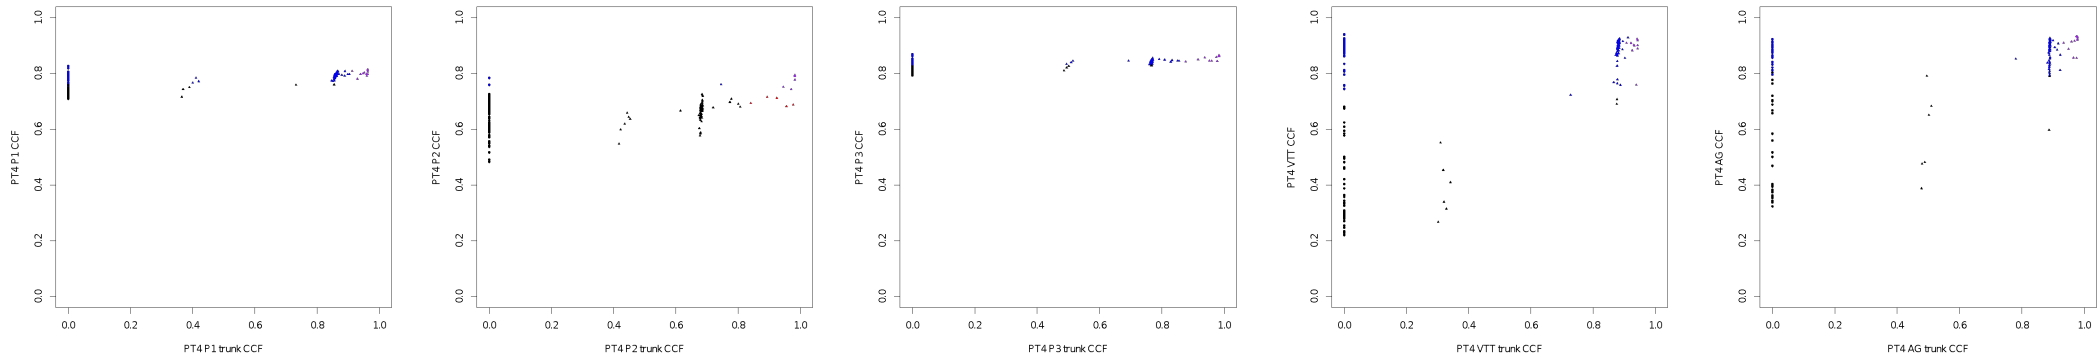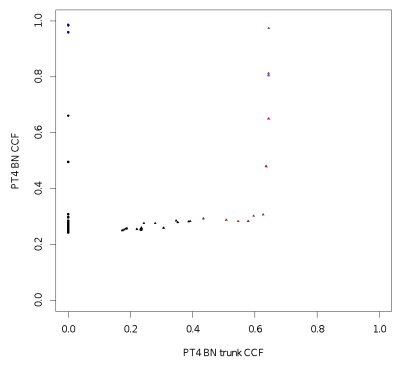

## B

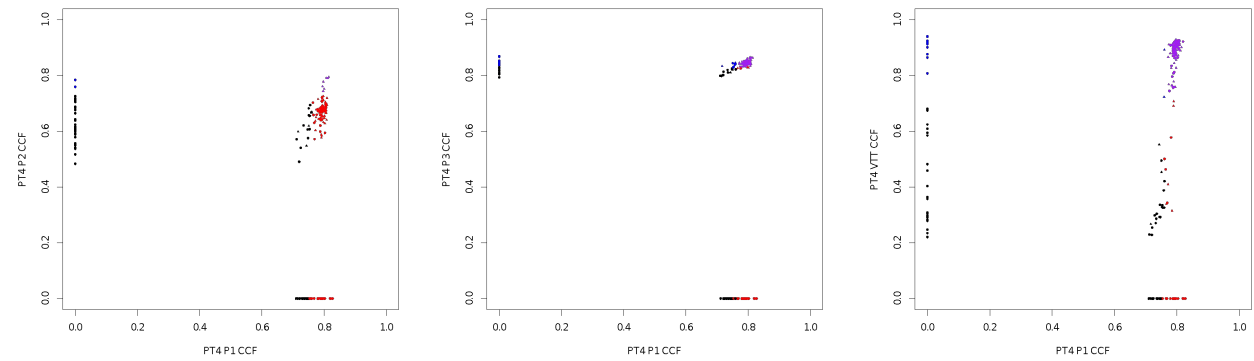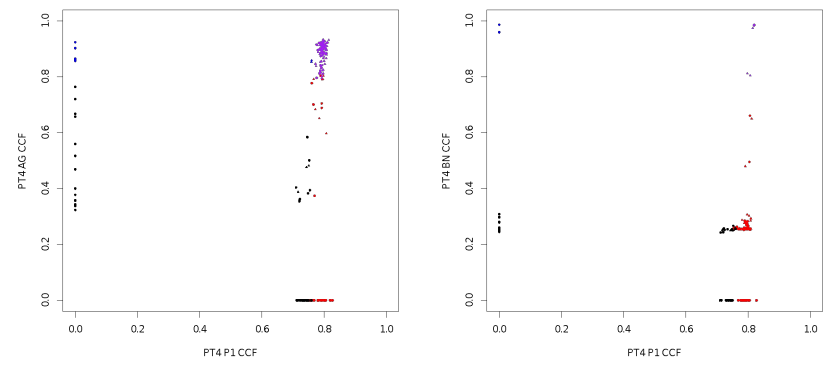

- ▲ Truncal, shared clonal
- ▲ Truncal, shared subclonal
- ▲ Truncal, X-clonal
- ▲ Truncal, Y-clonal
- Shared clonal, non-truncal
- Shared subclonal, non-truncal
- X-clonal, non-truncal
- Y-clonal, non-truncal

**Figure S6.**

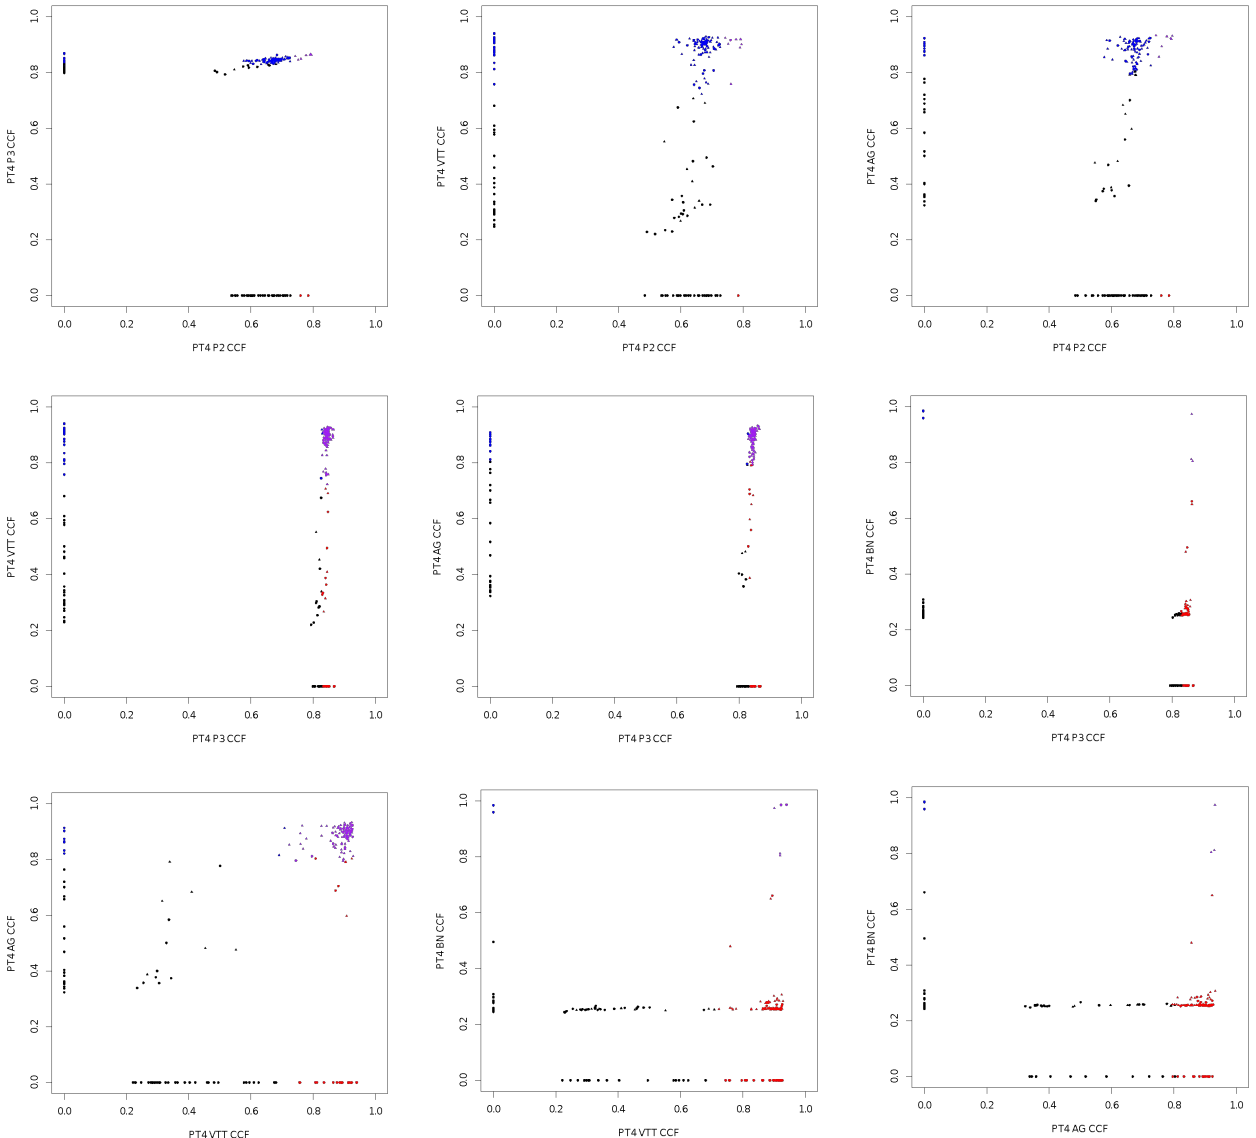

**C**

**PT4**

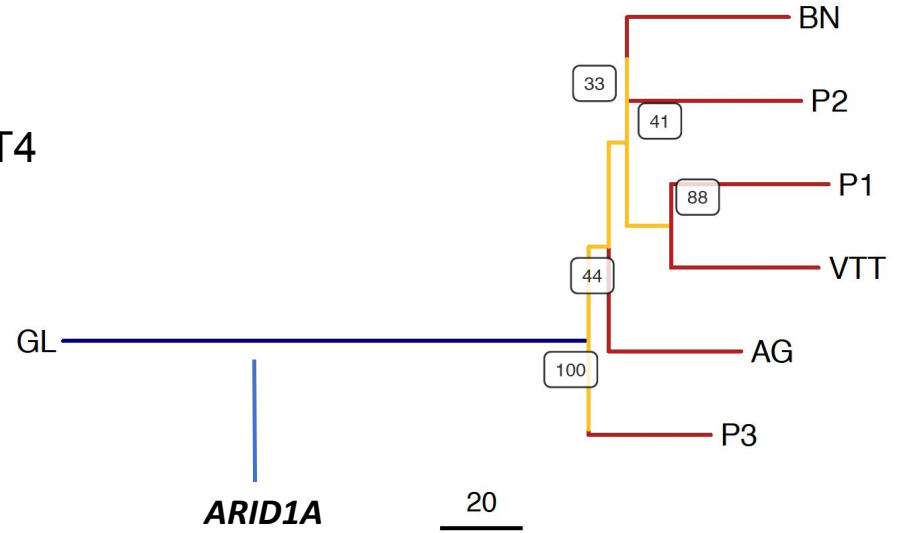

Figure S6.

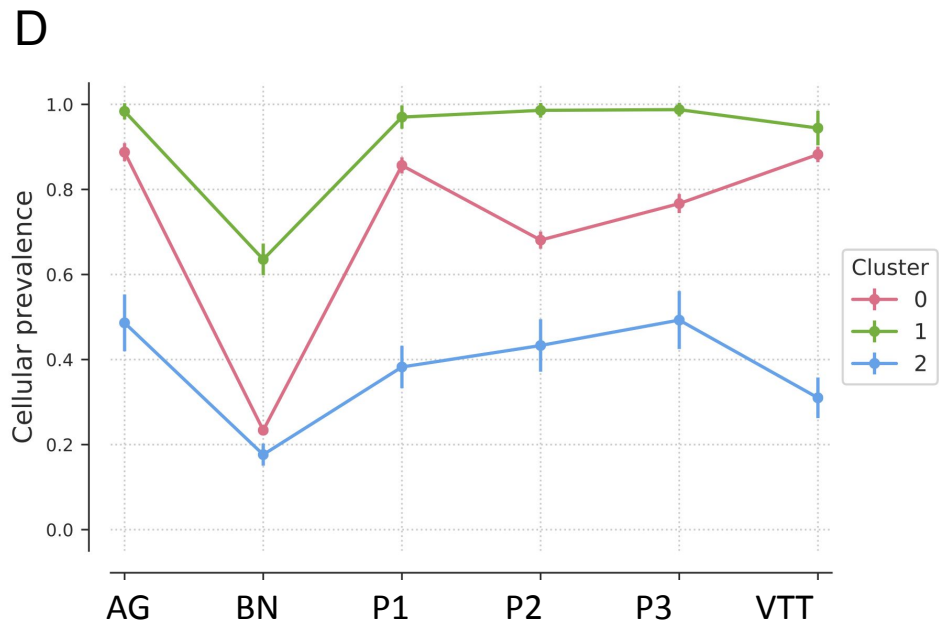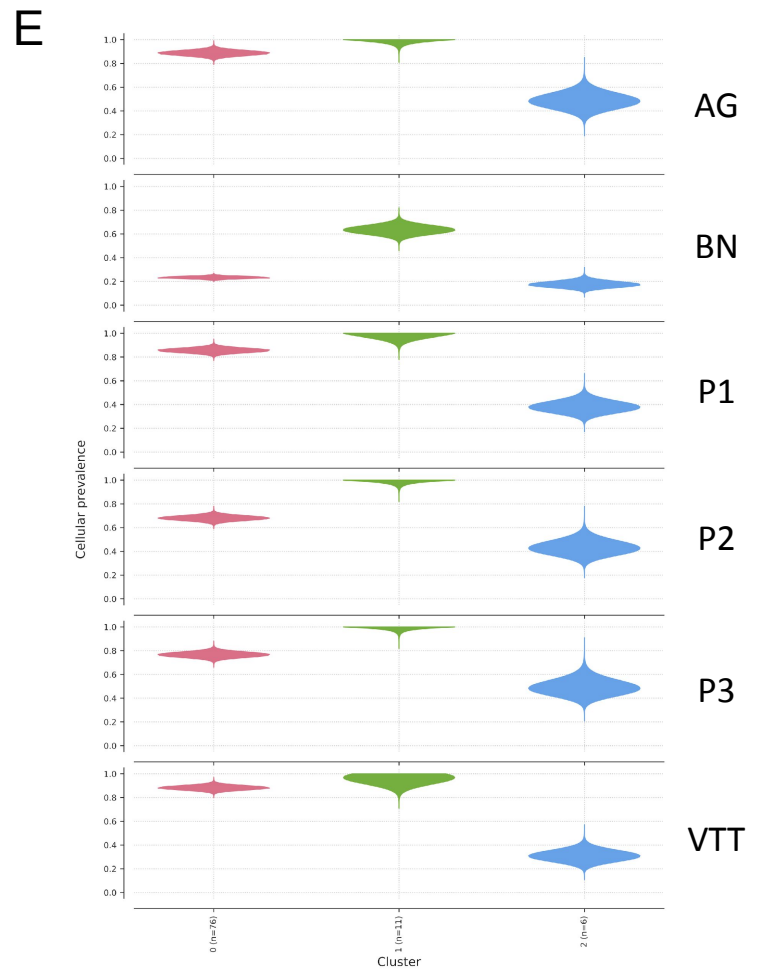



# Figure S7.

**A**

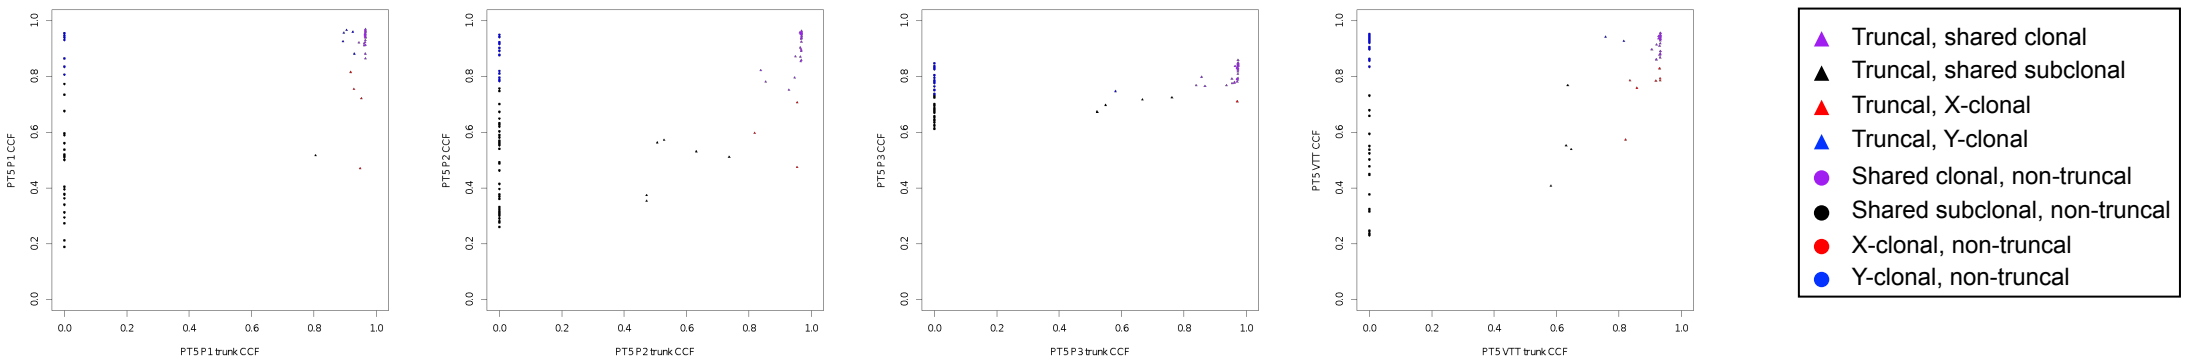

**B**

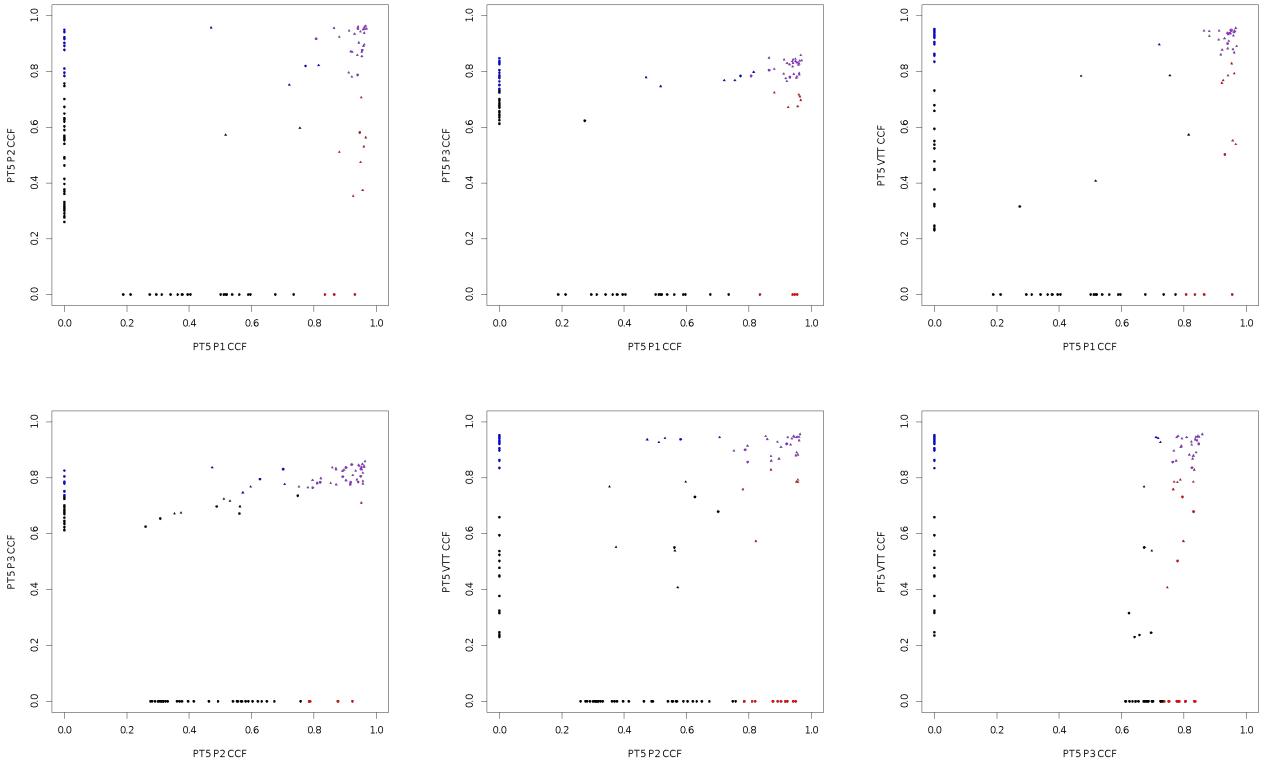

**C**

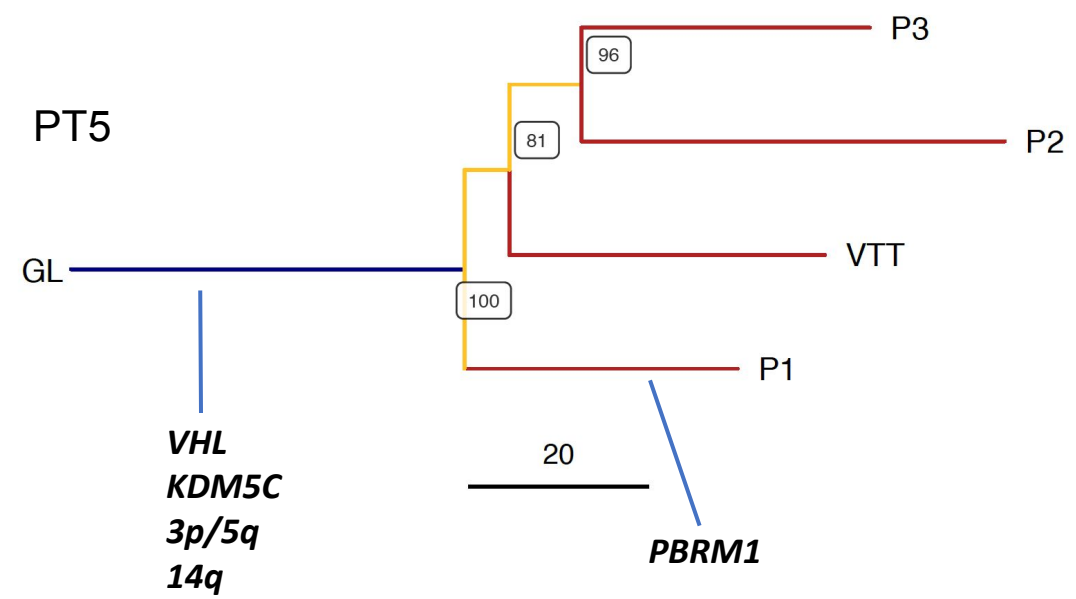

**Figure S7.**

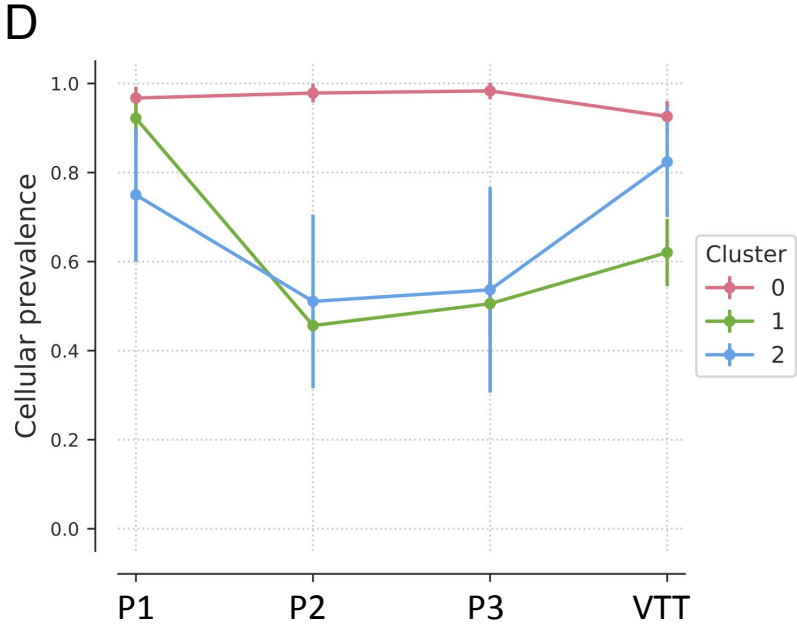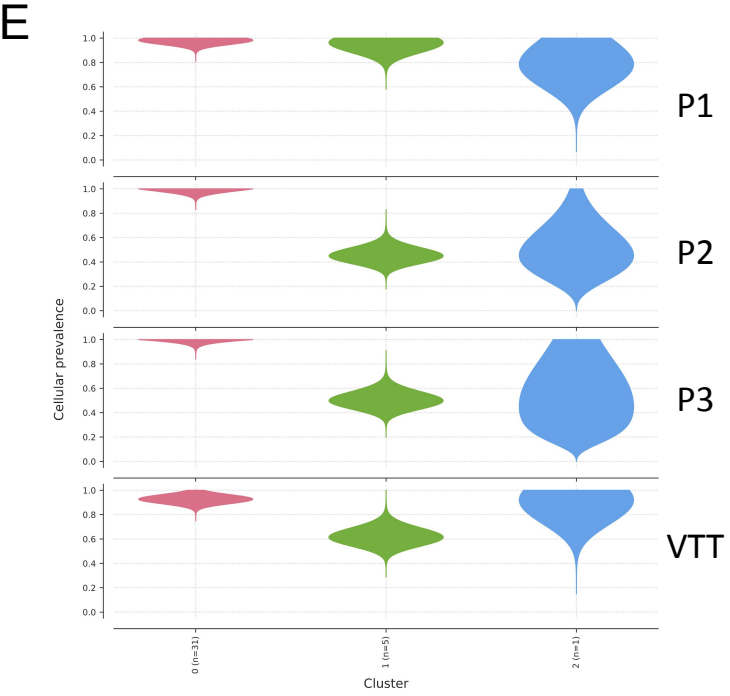

# Figure S8.

**A**

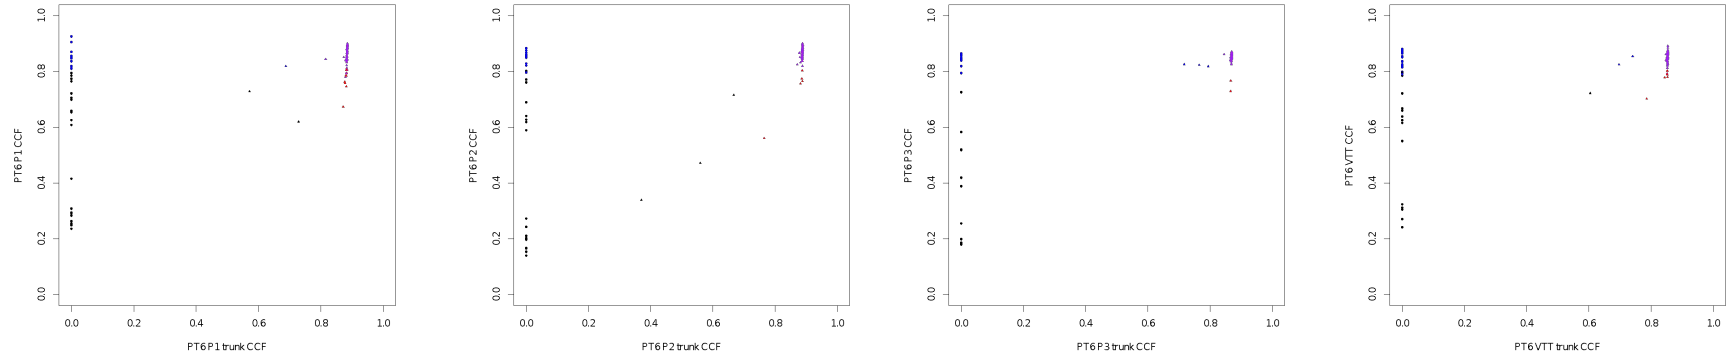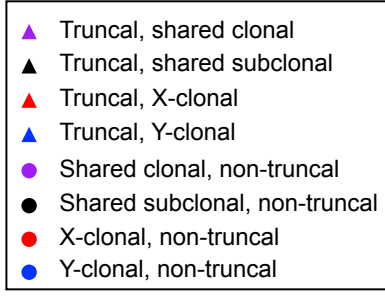

**B**

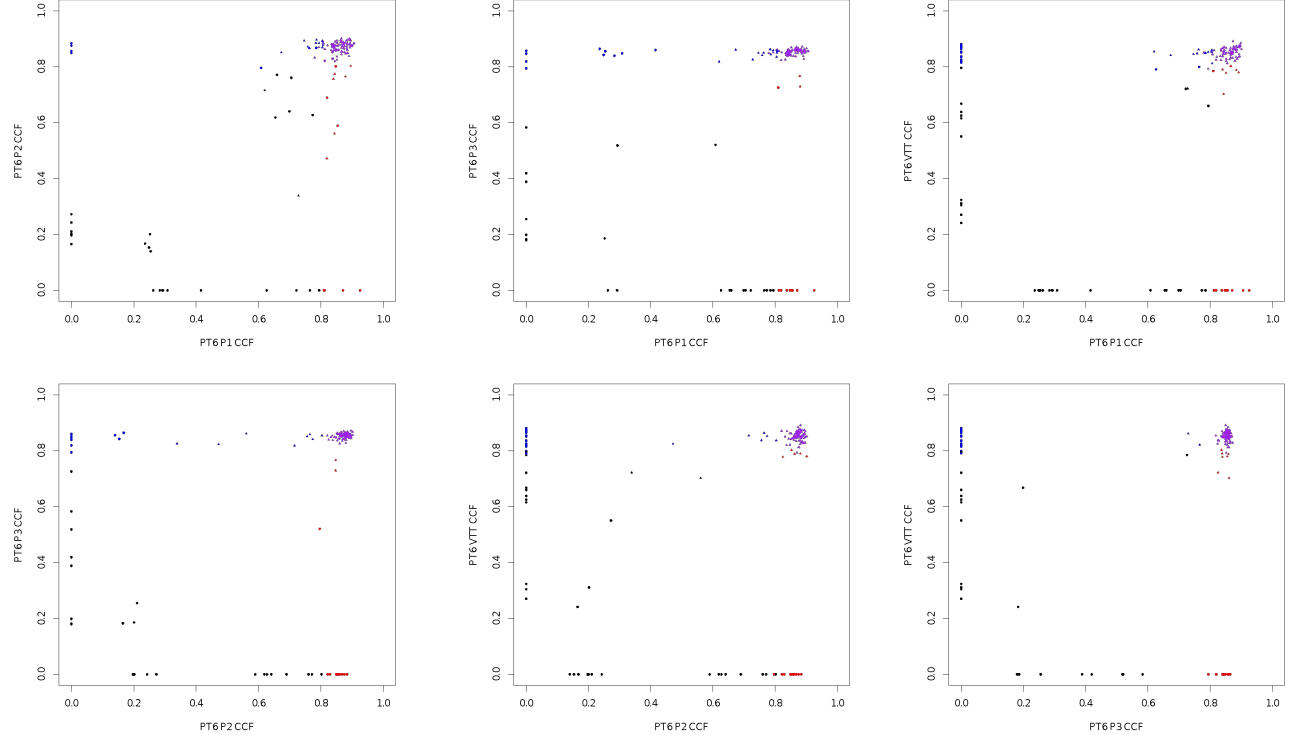

**C**

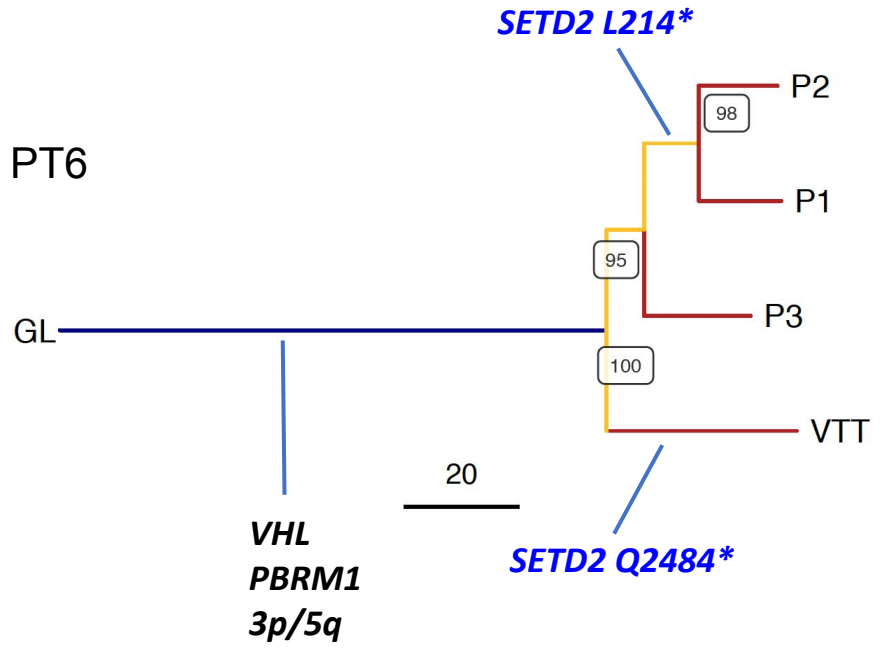

**Figure S8.**

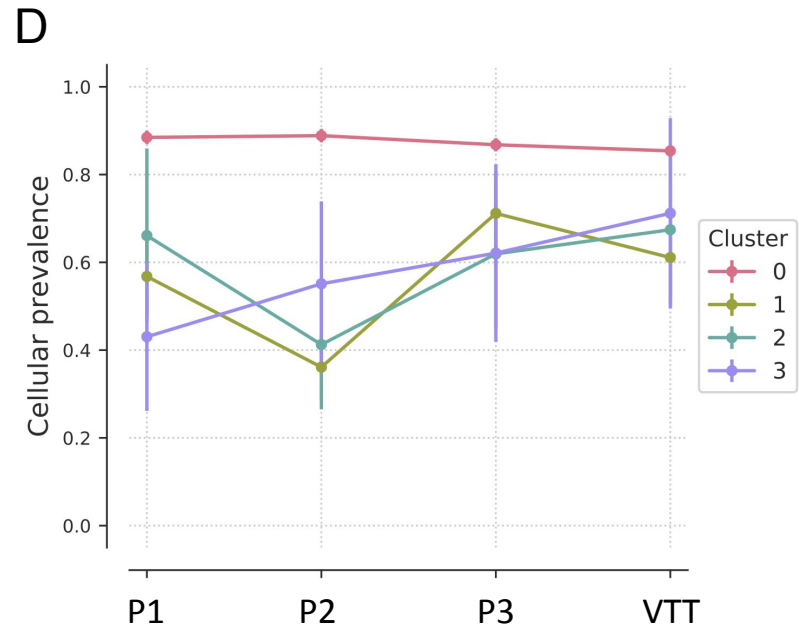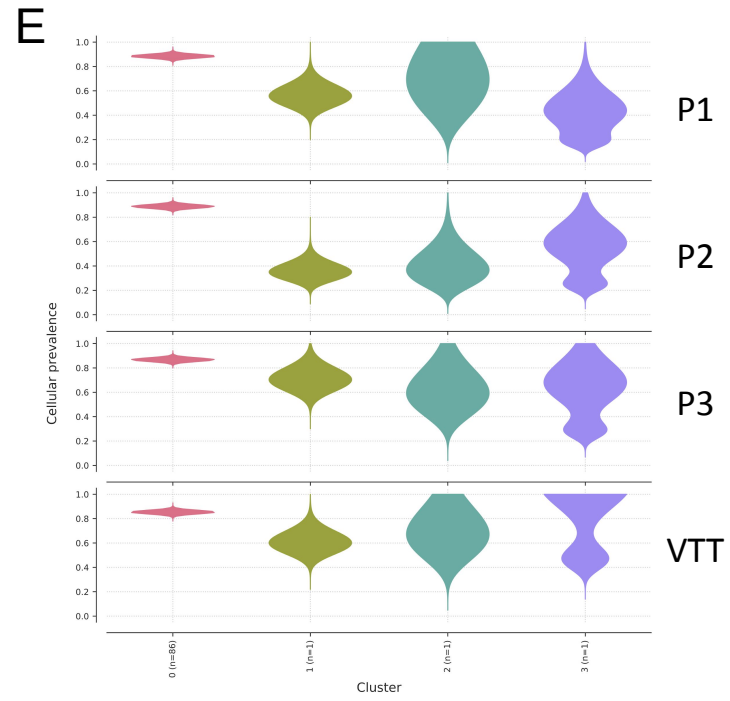



# Figure S9.

**A**

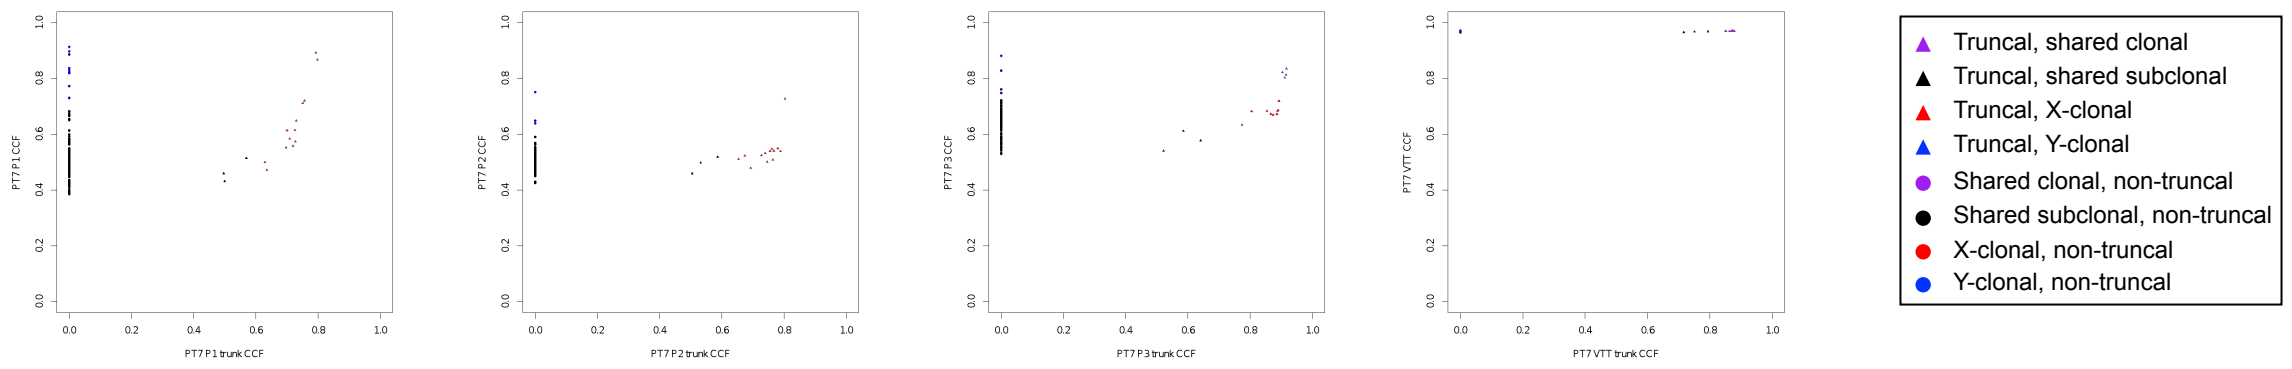

**B**

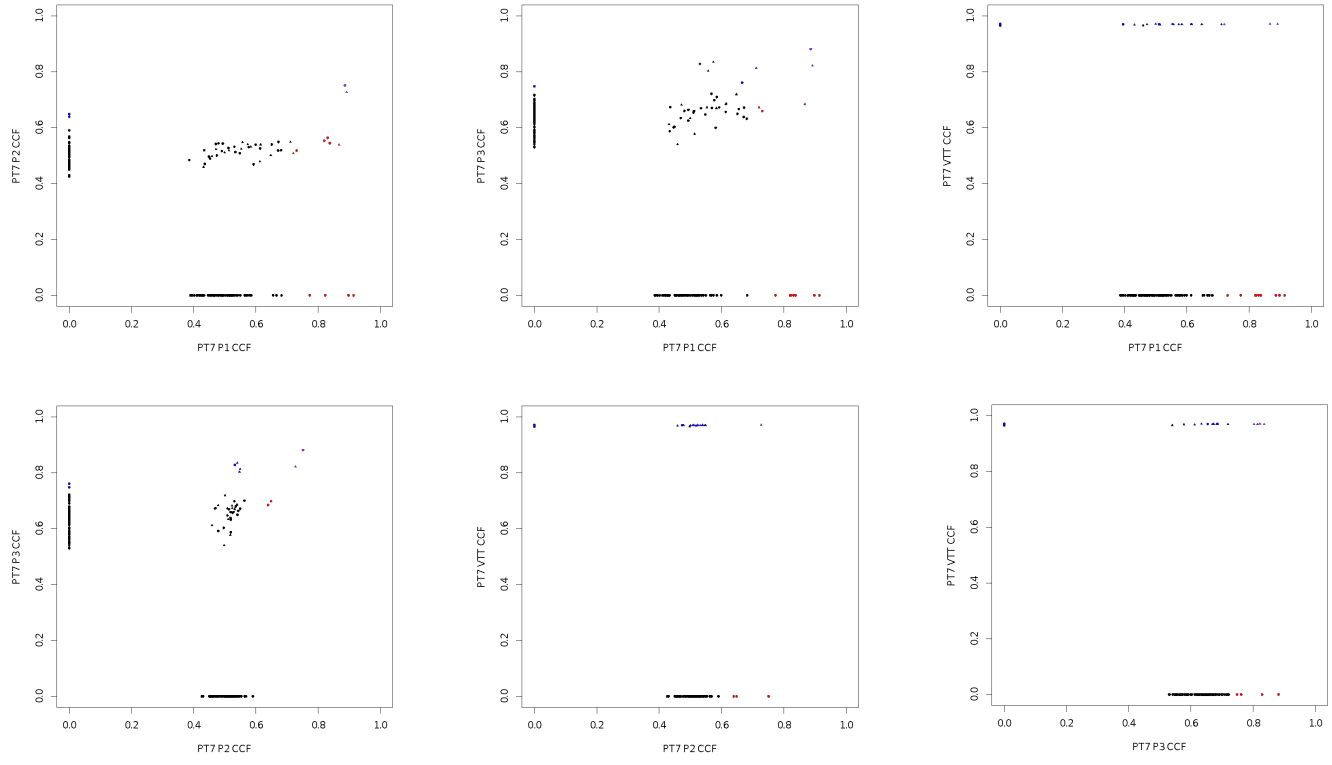

**C**

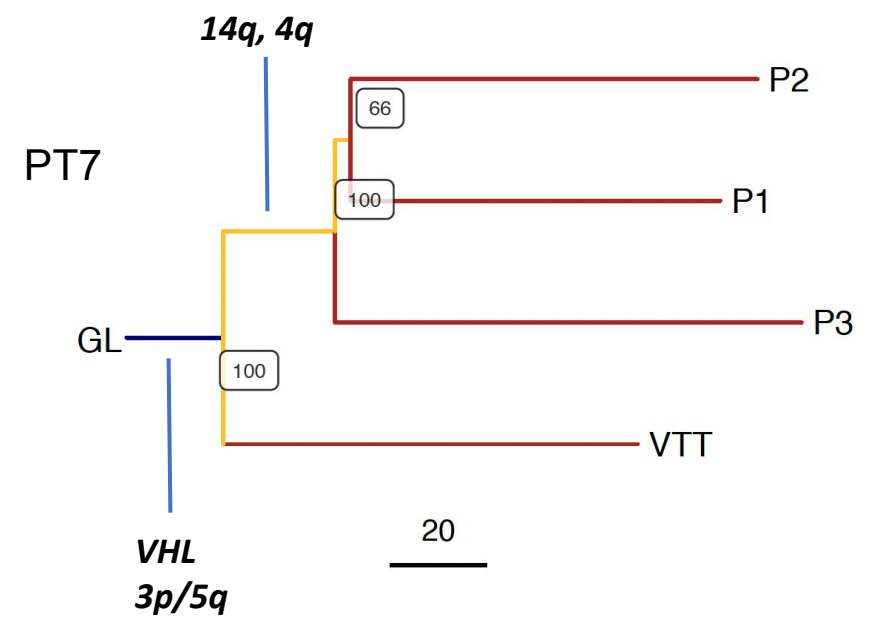

**Figure S9.**

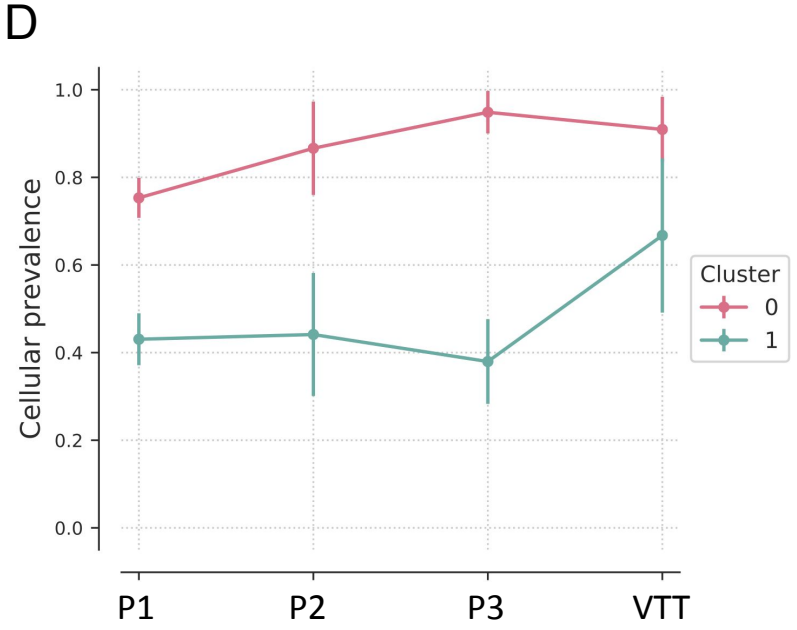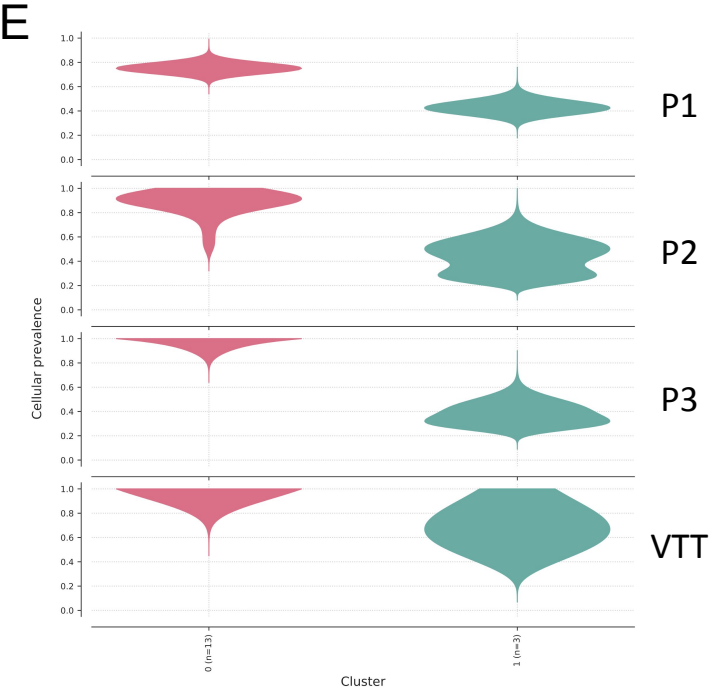

# Figure S10.

**A**

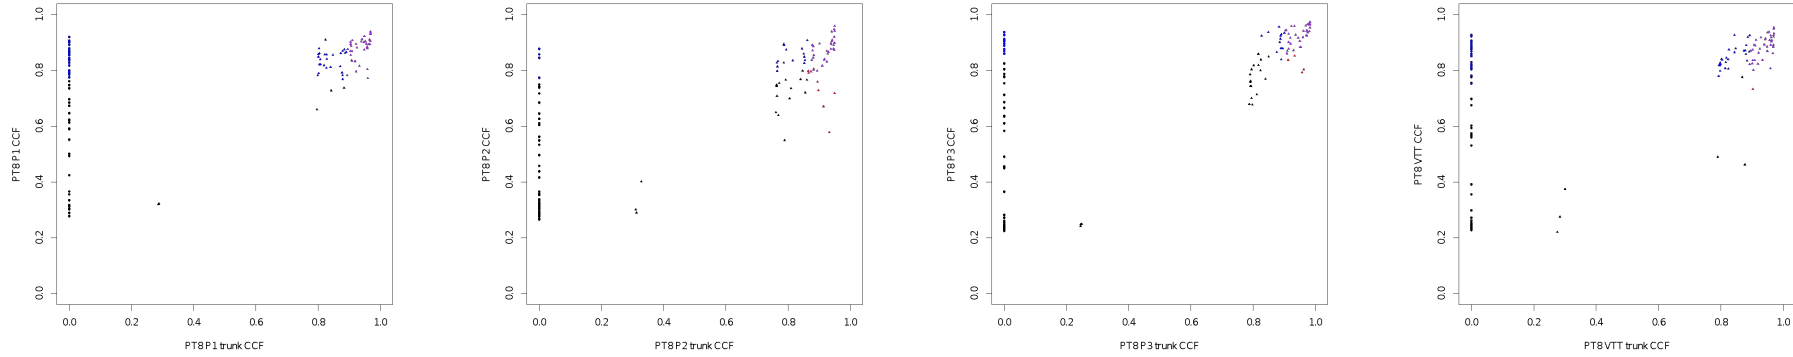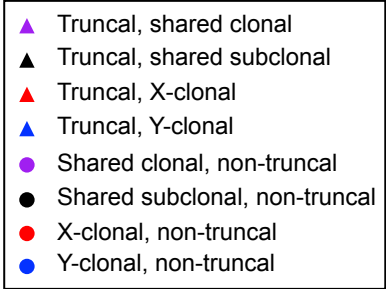

**B**

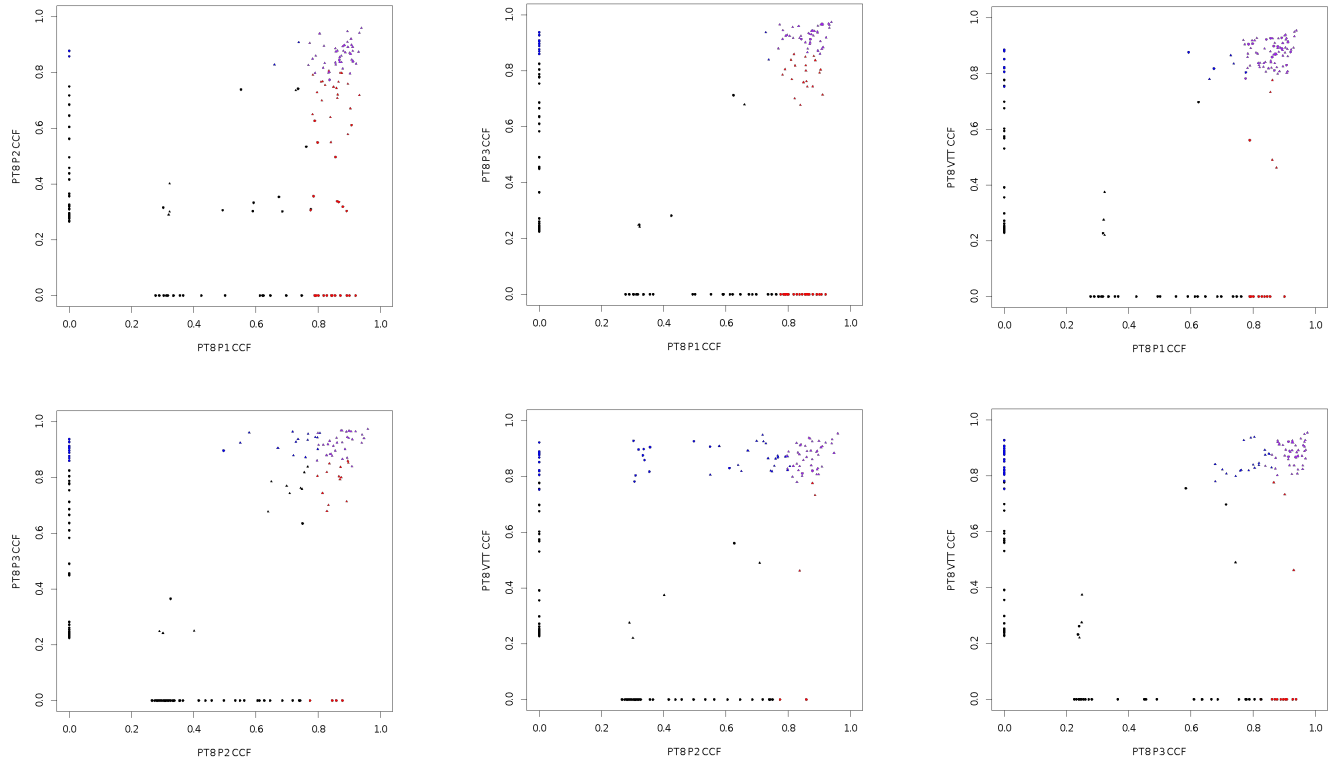

**C**

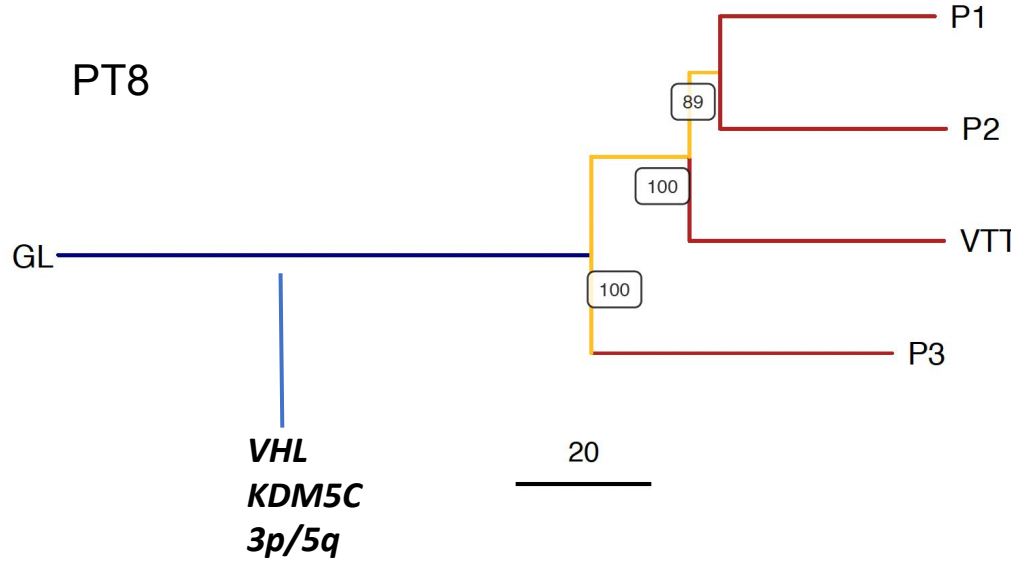

Figure S10.

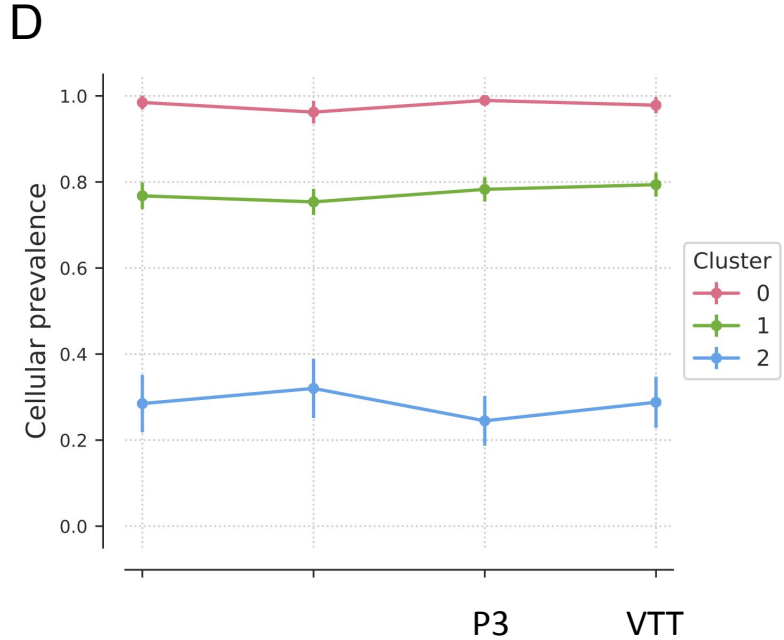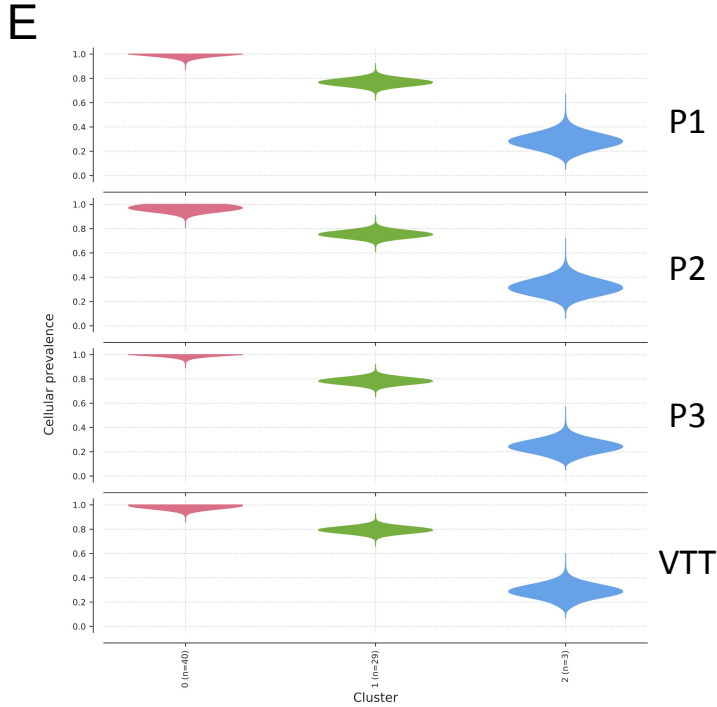

# Figure S11.

**A**

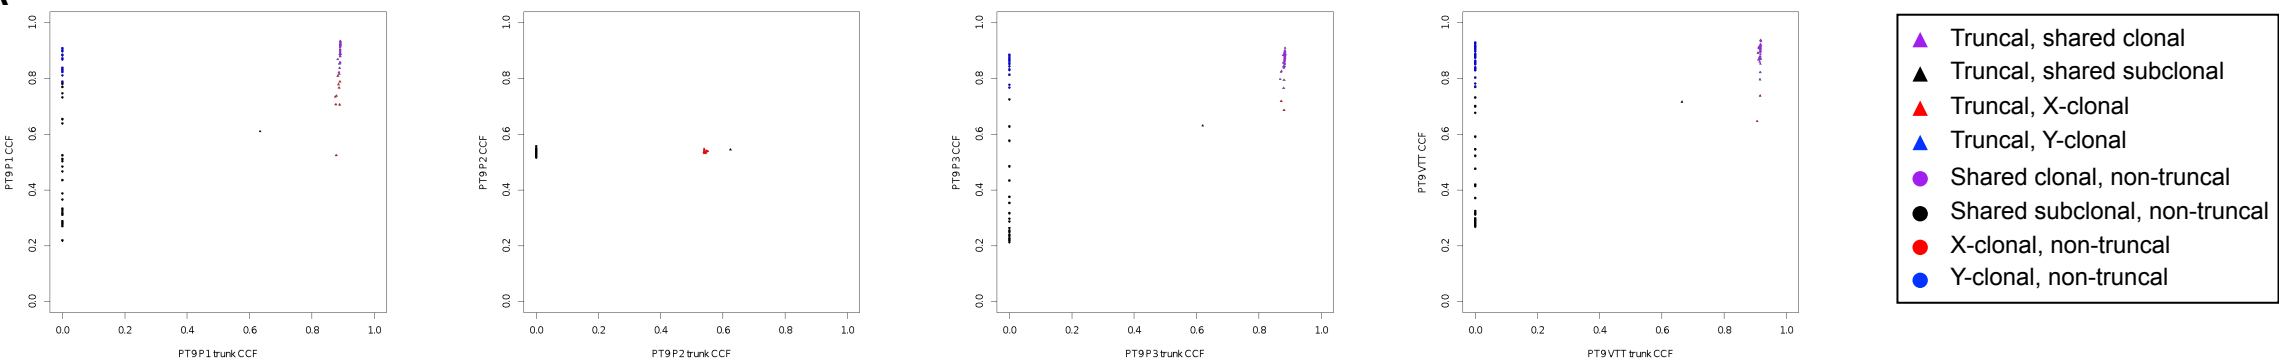

**B**

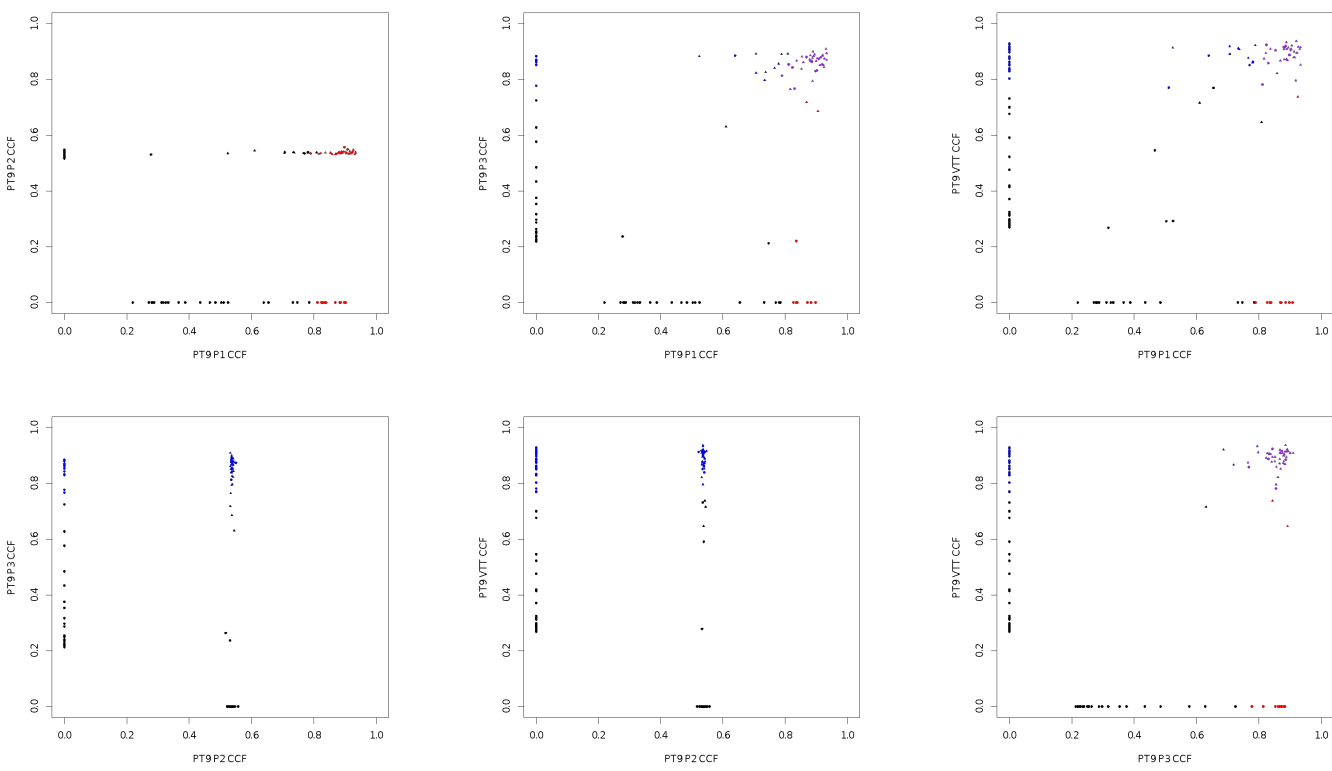

**C**

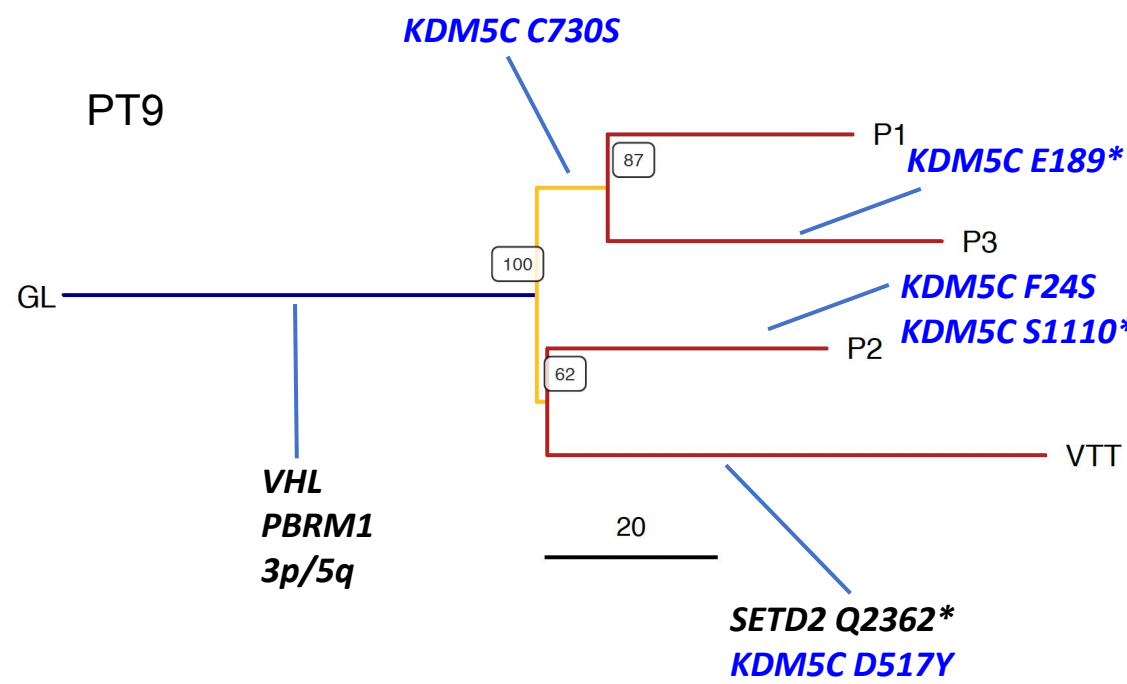

Figure S11.

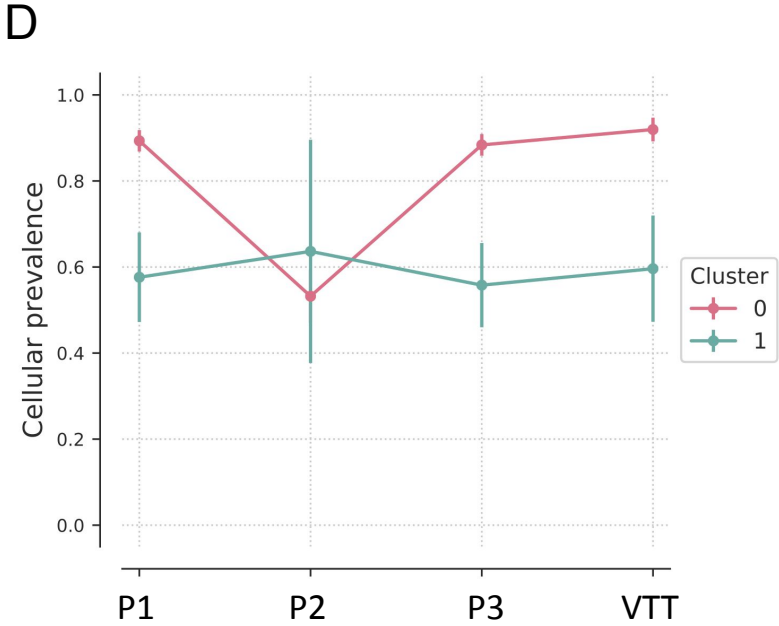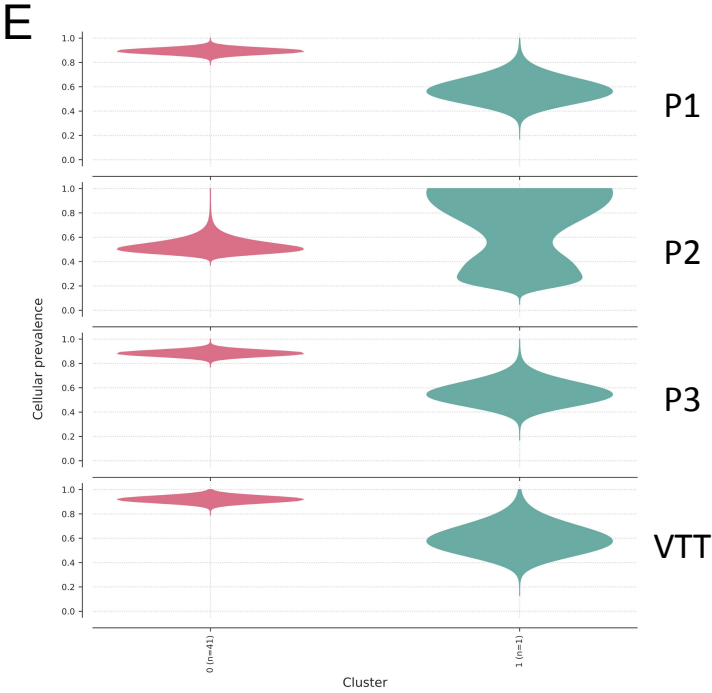

# Figure S12.

A

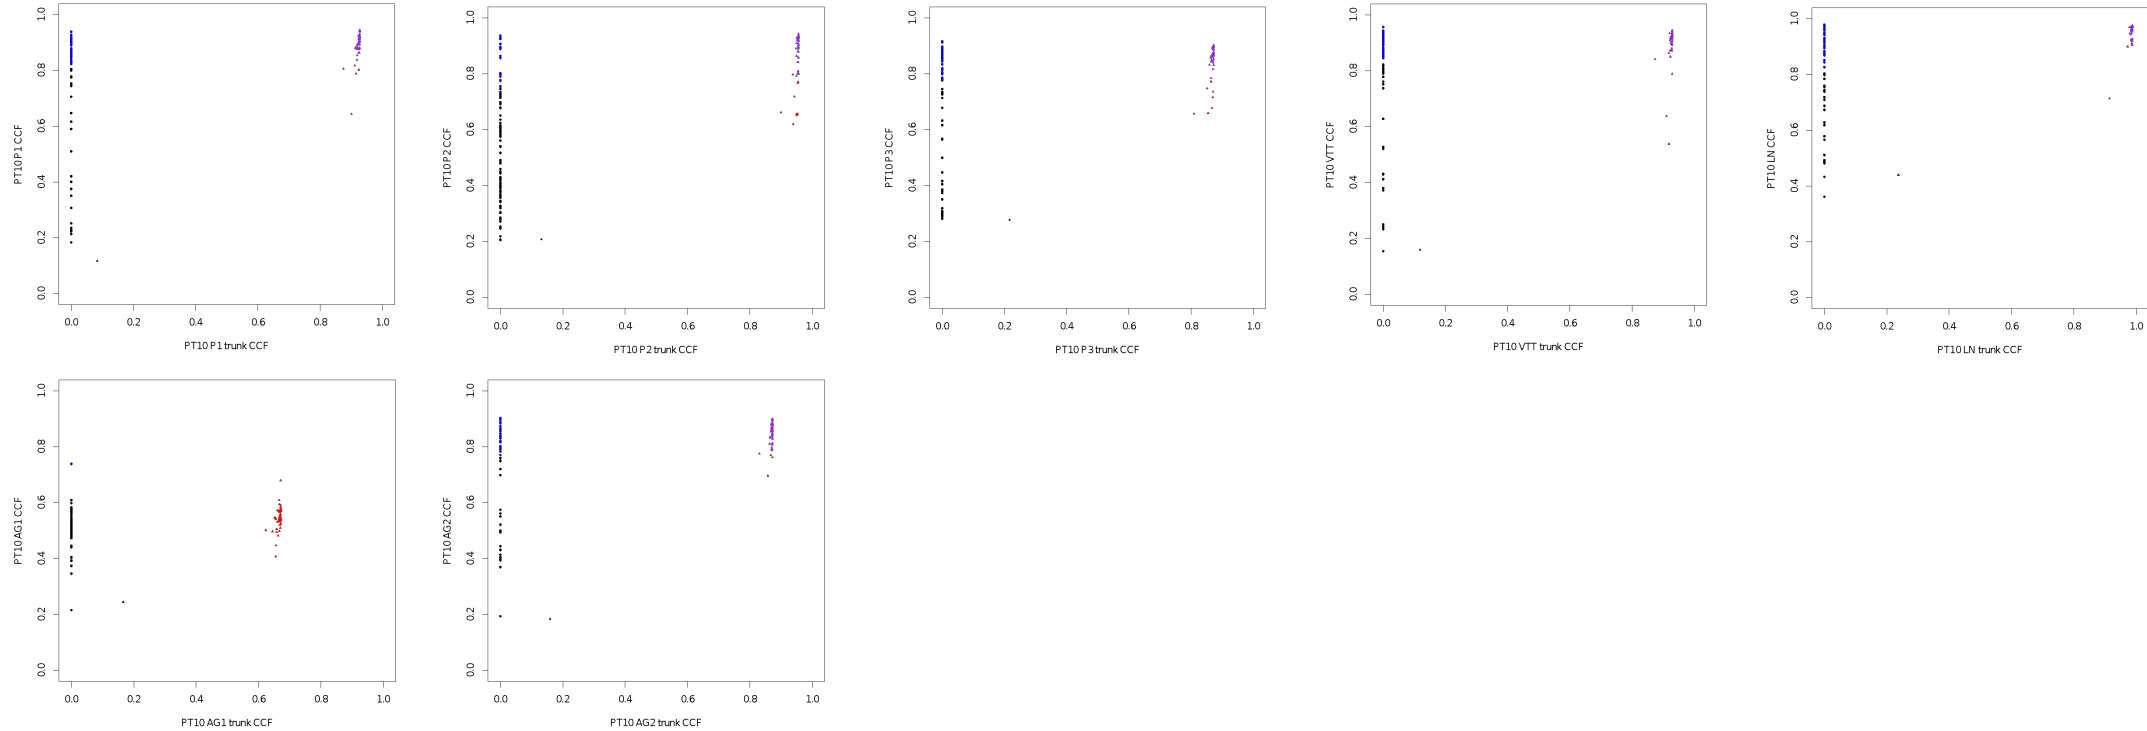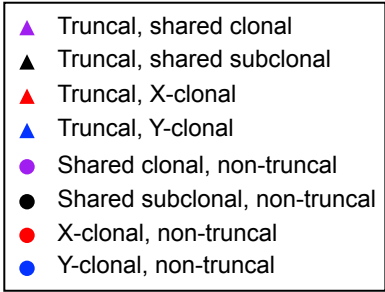



# Figure S12.

B

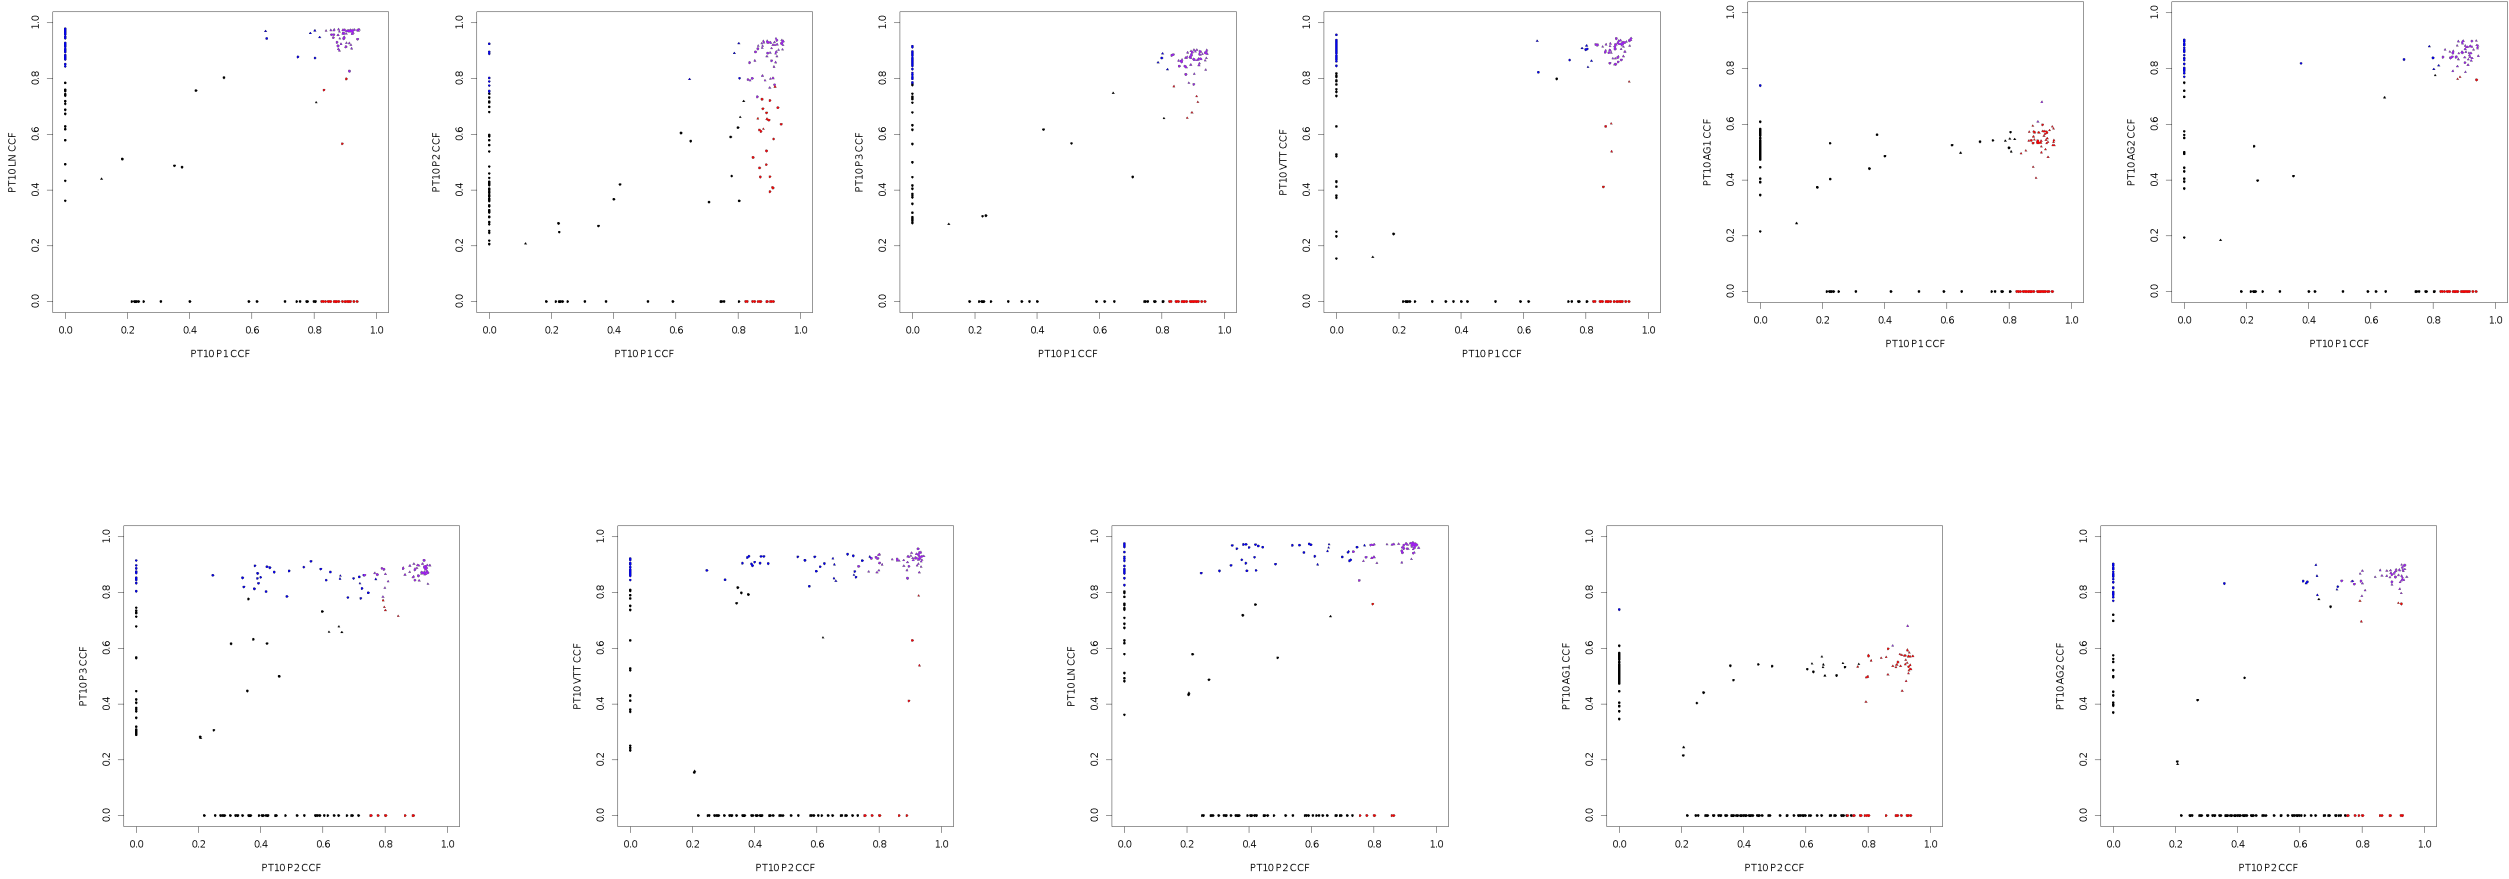

# Figure S12.

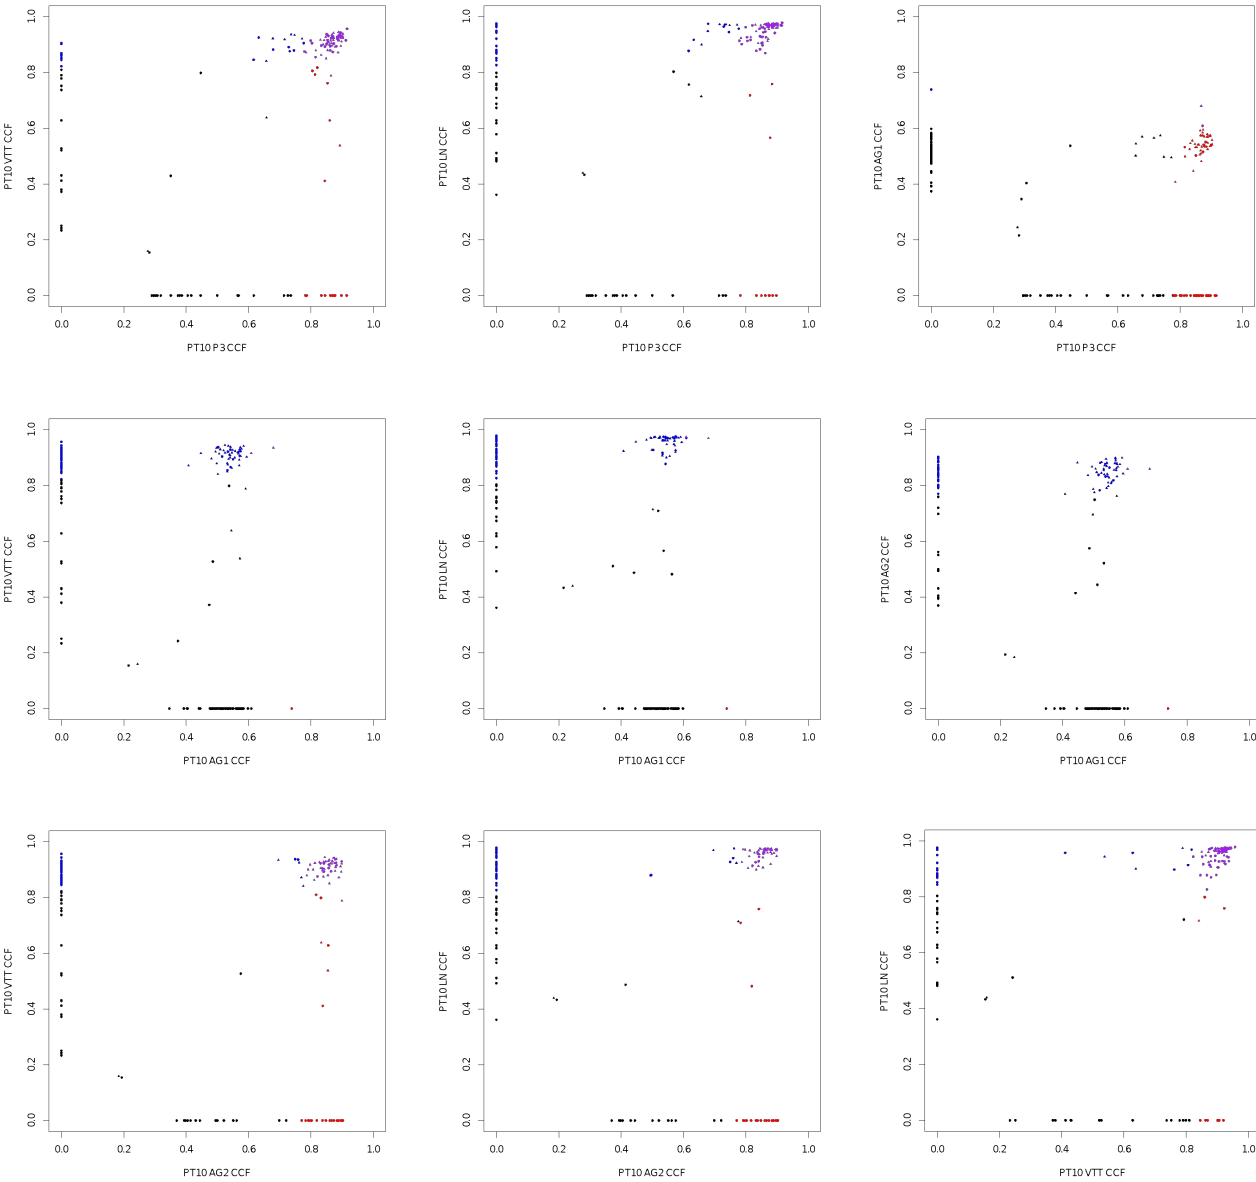

C

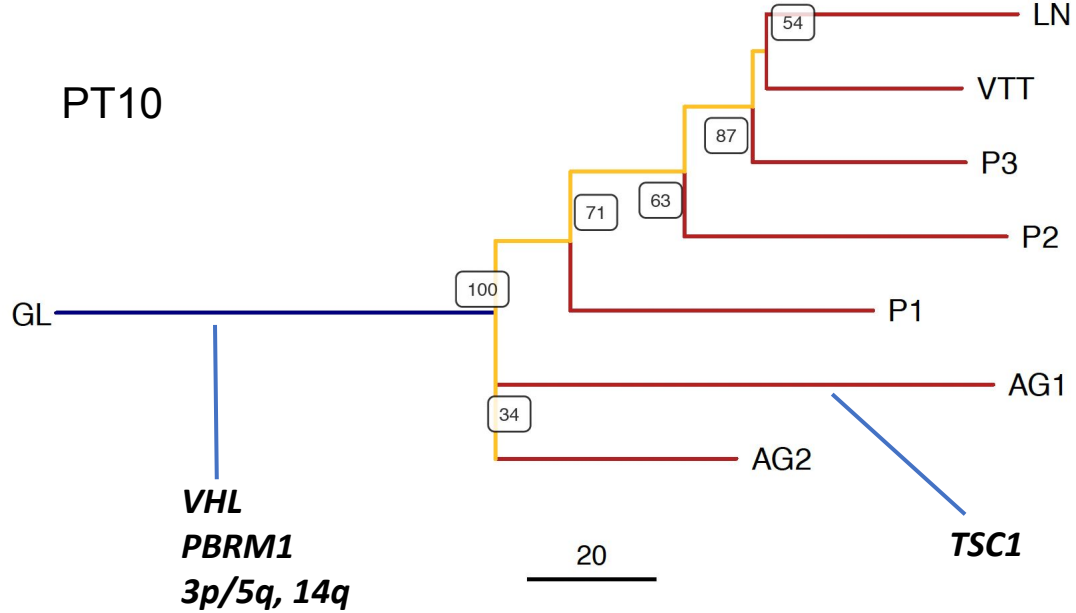

Figure S12.

D

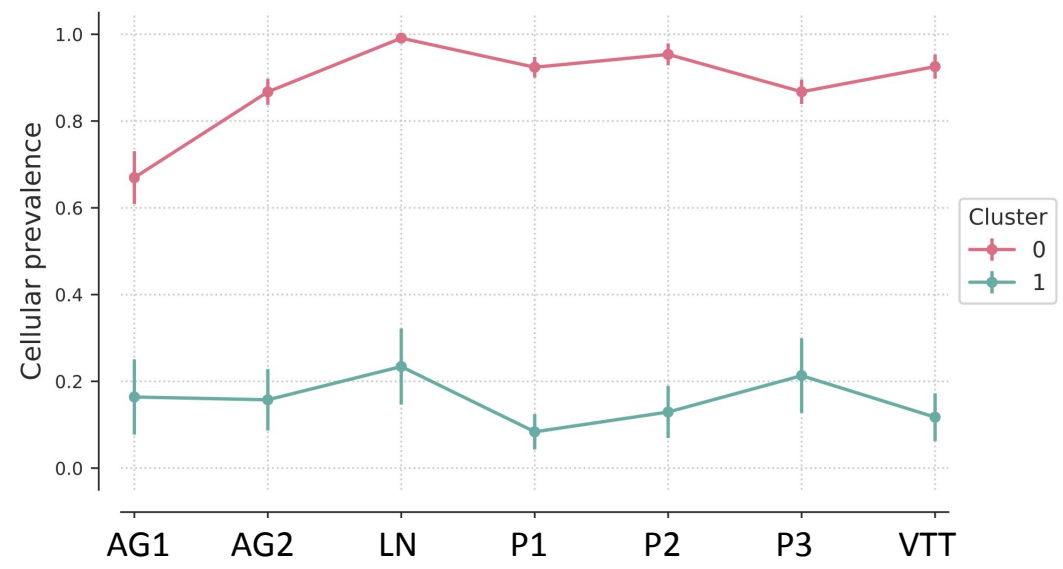

E

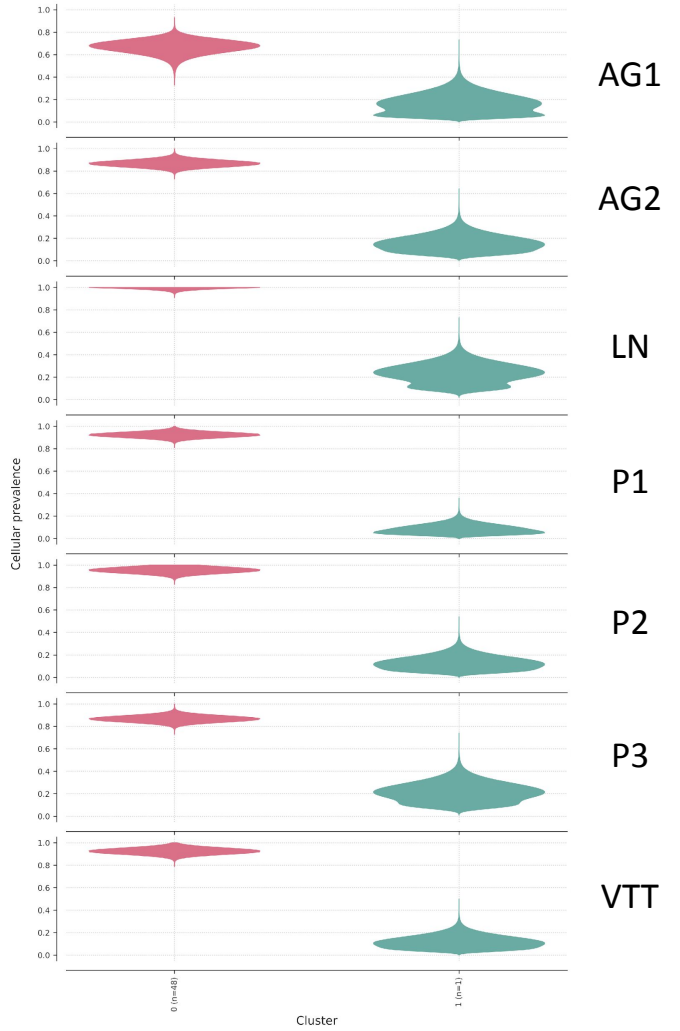

# Figure S13.

## A

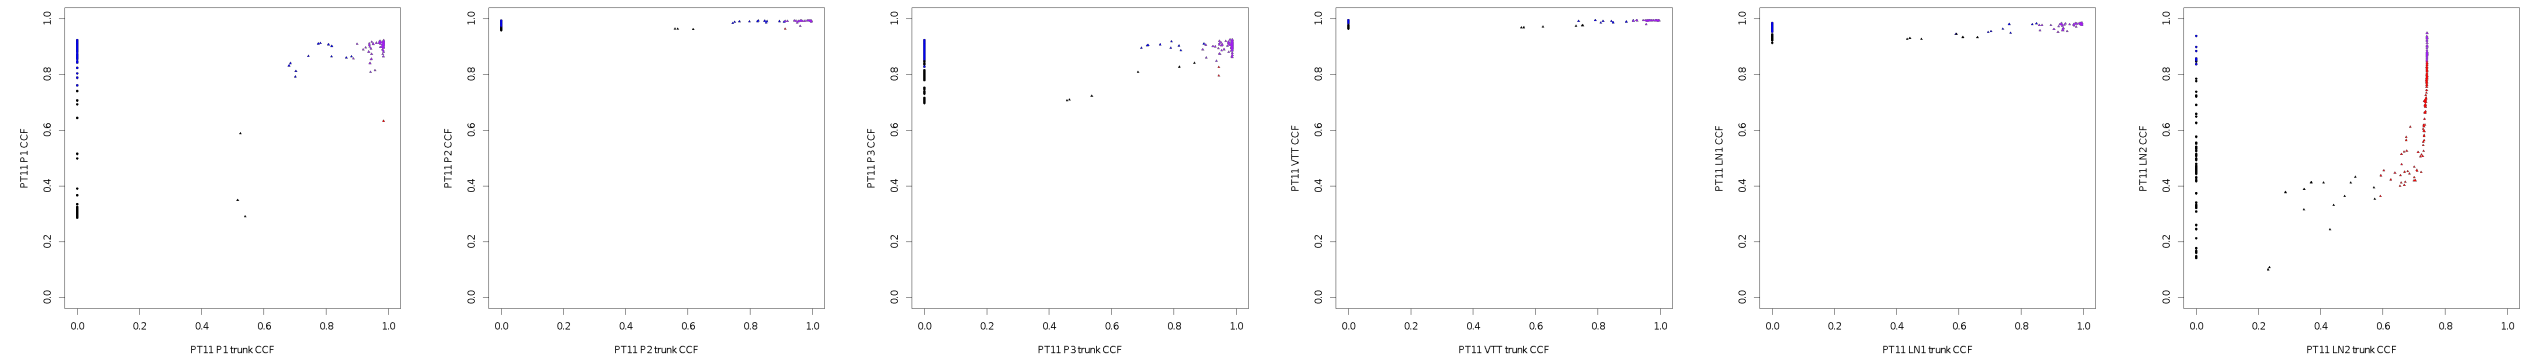

## B

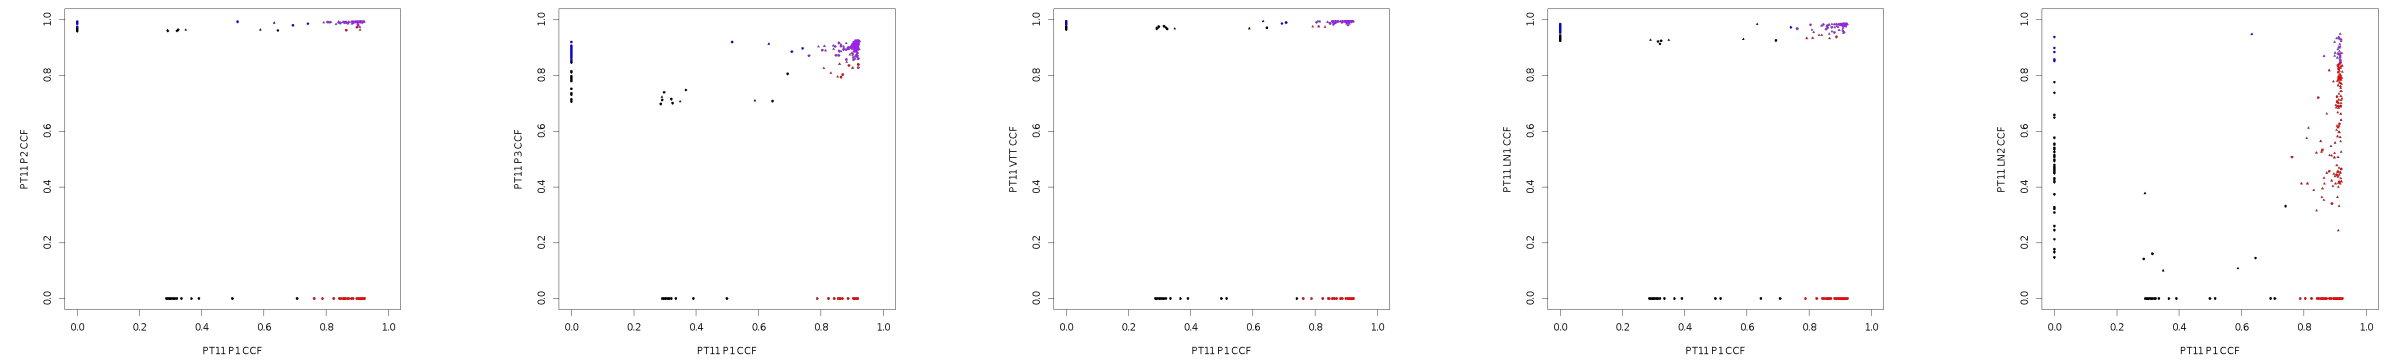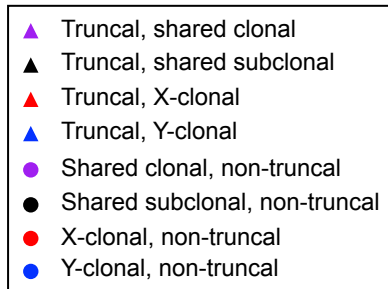

# Figure S13.

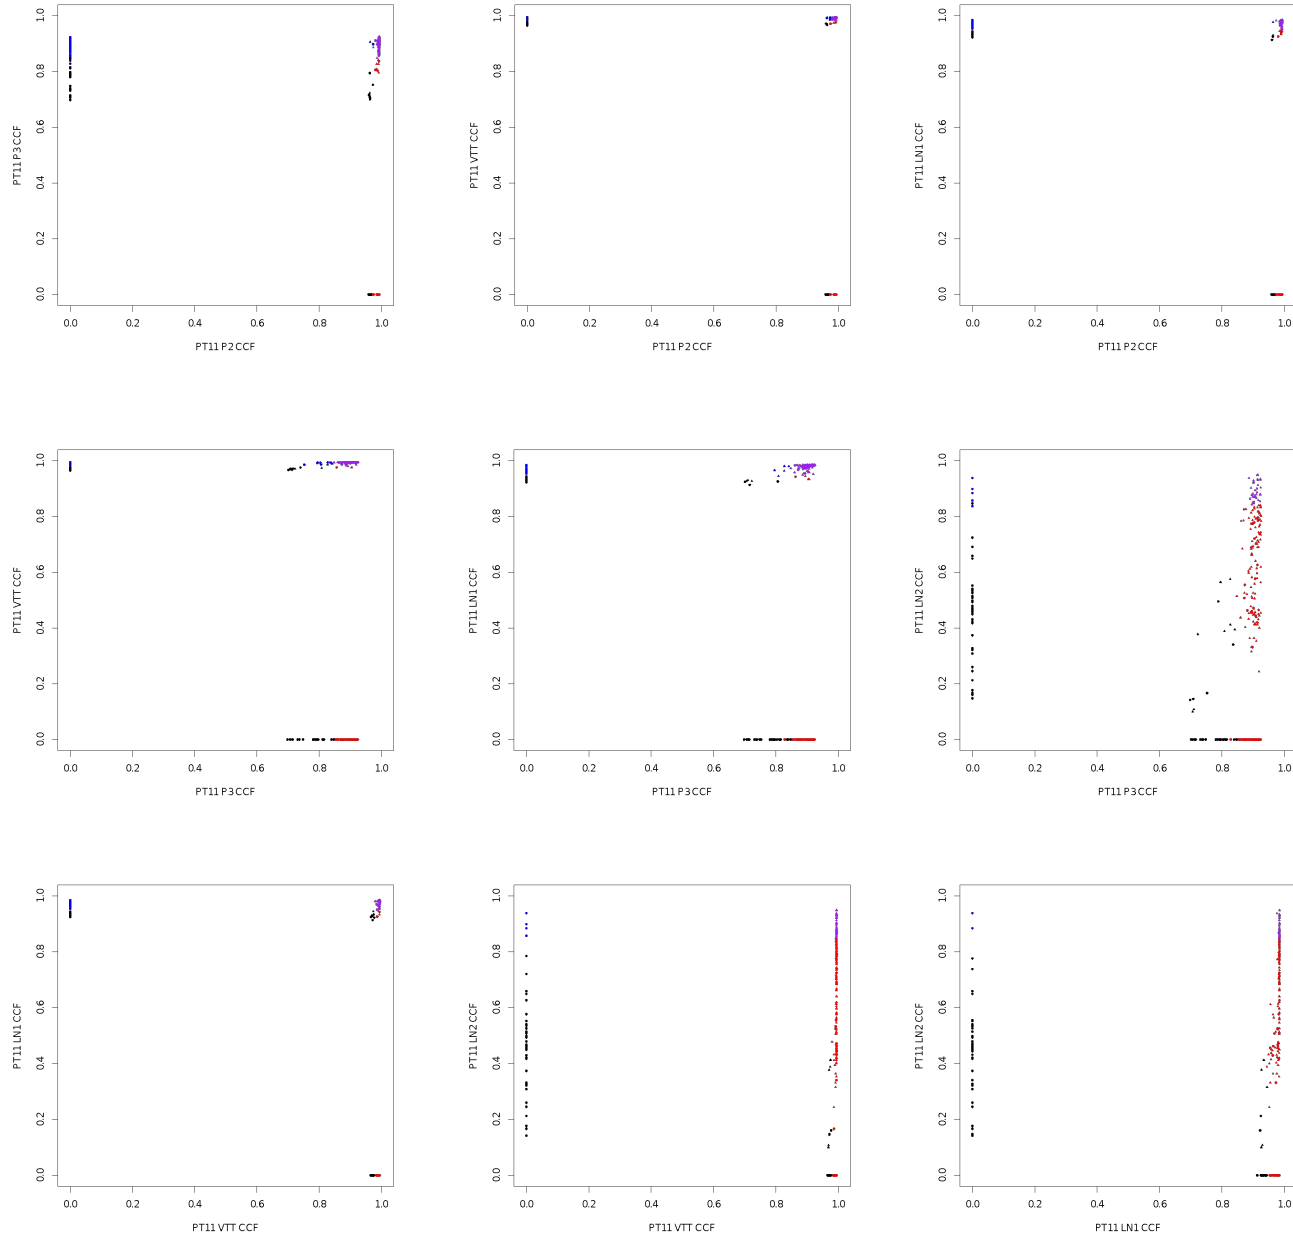

C

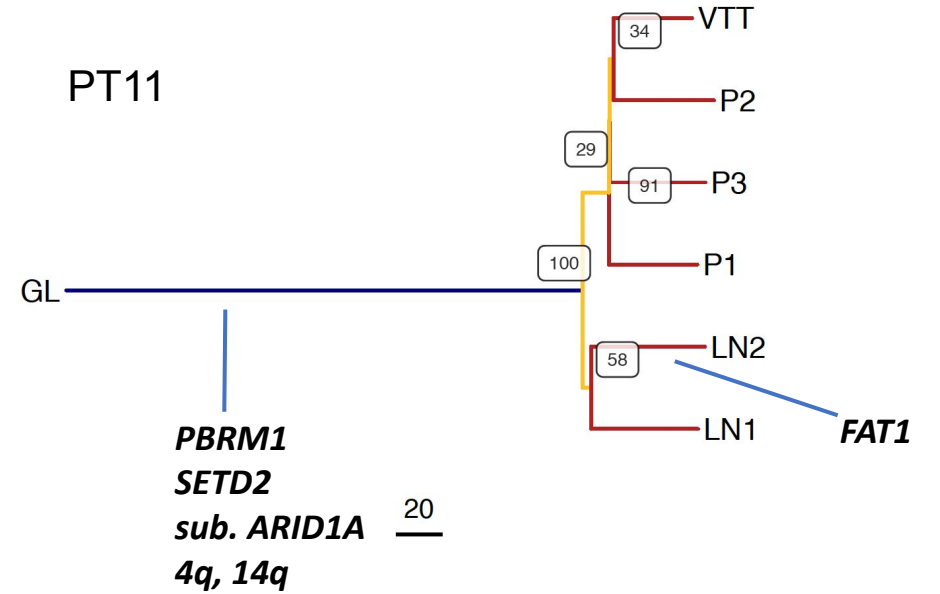

# Figure S13.

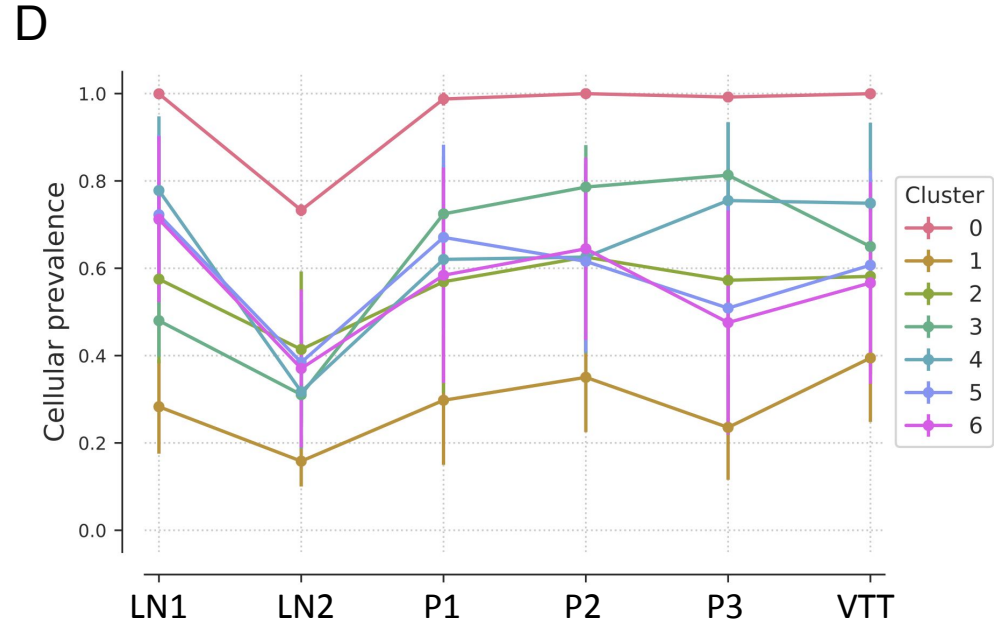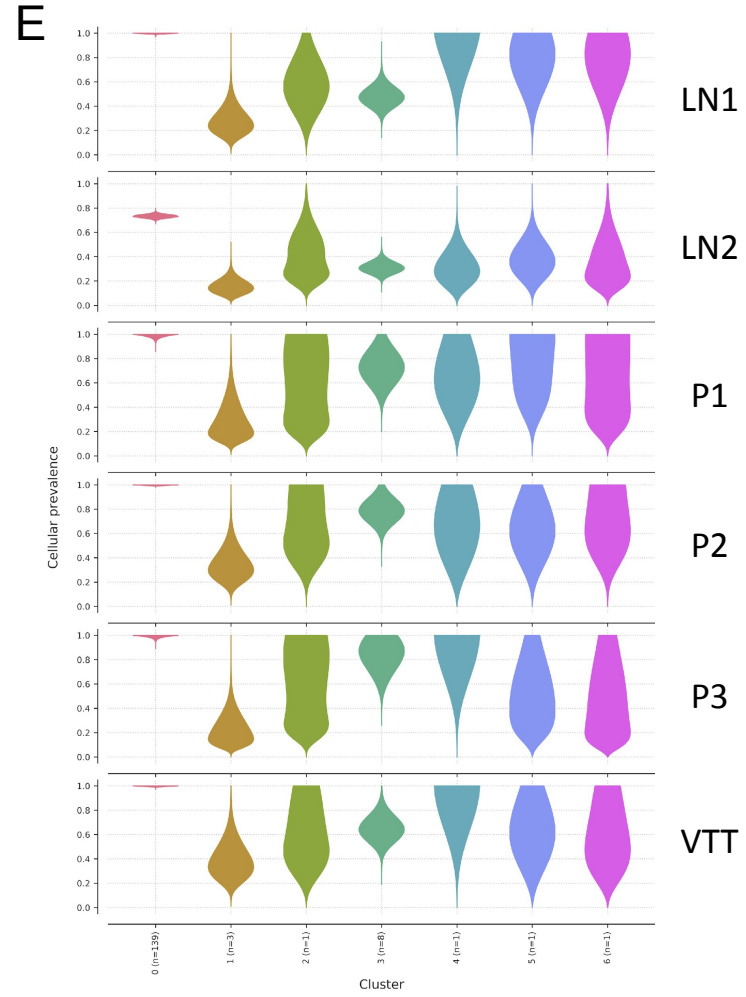

# Figure S14.

**A**

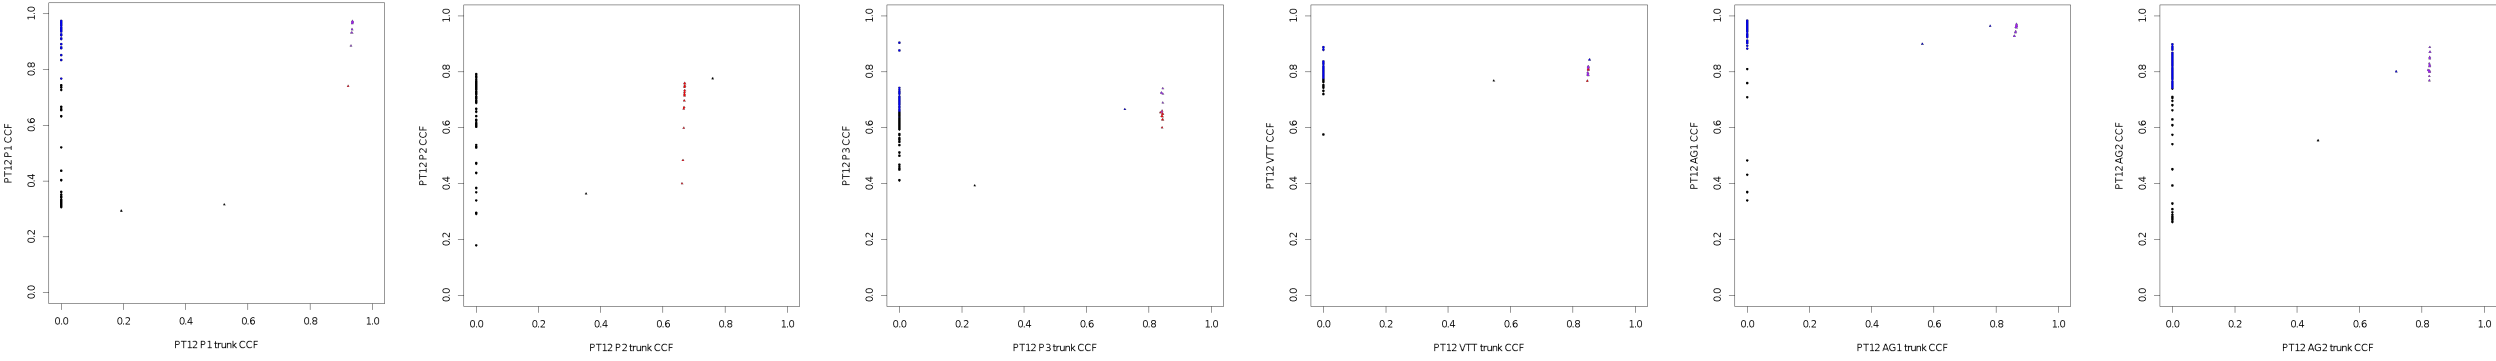

**B**

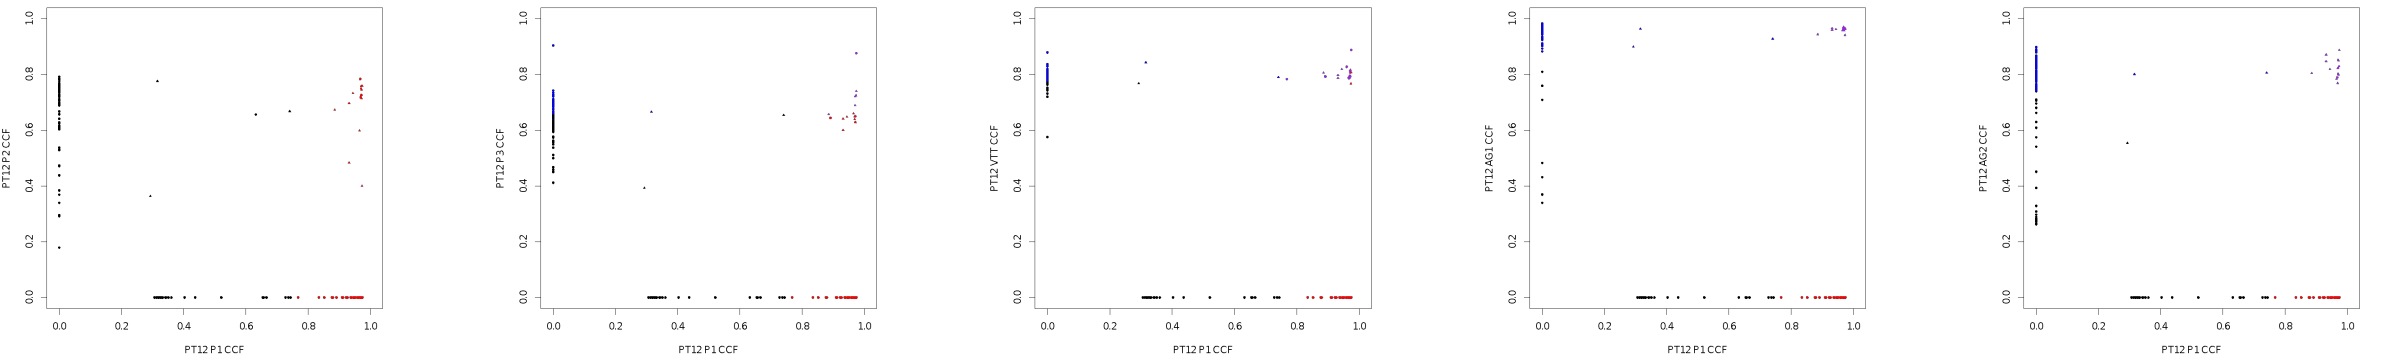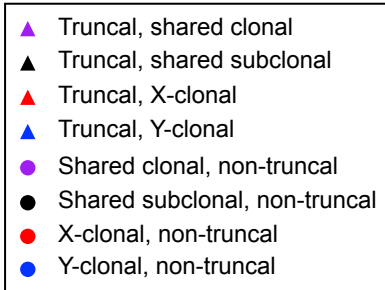

**Figure S14.**

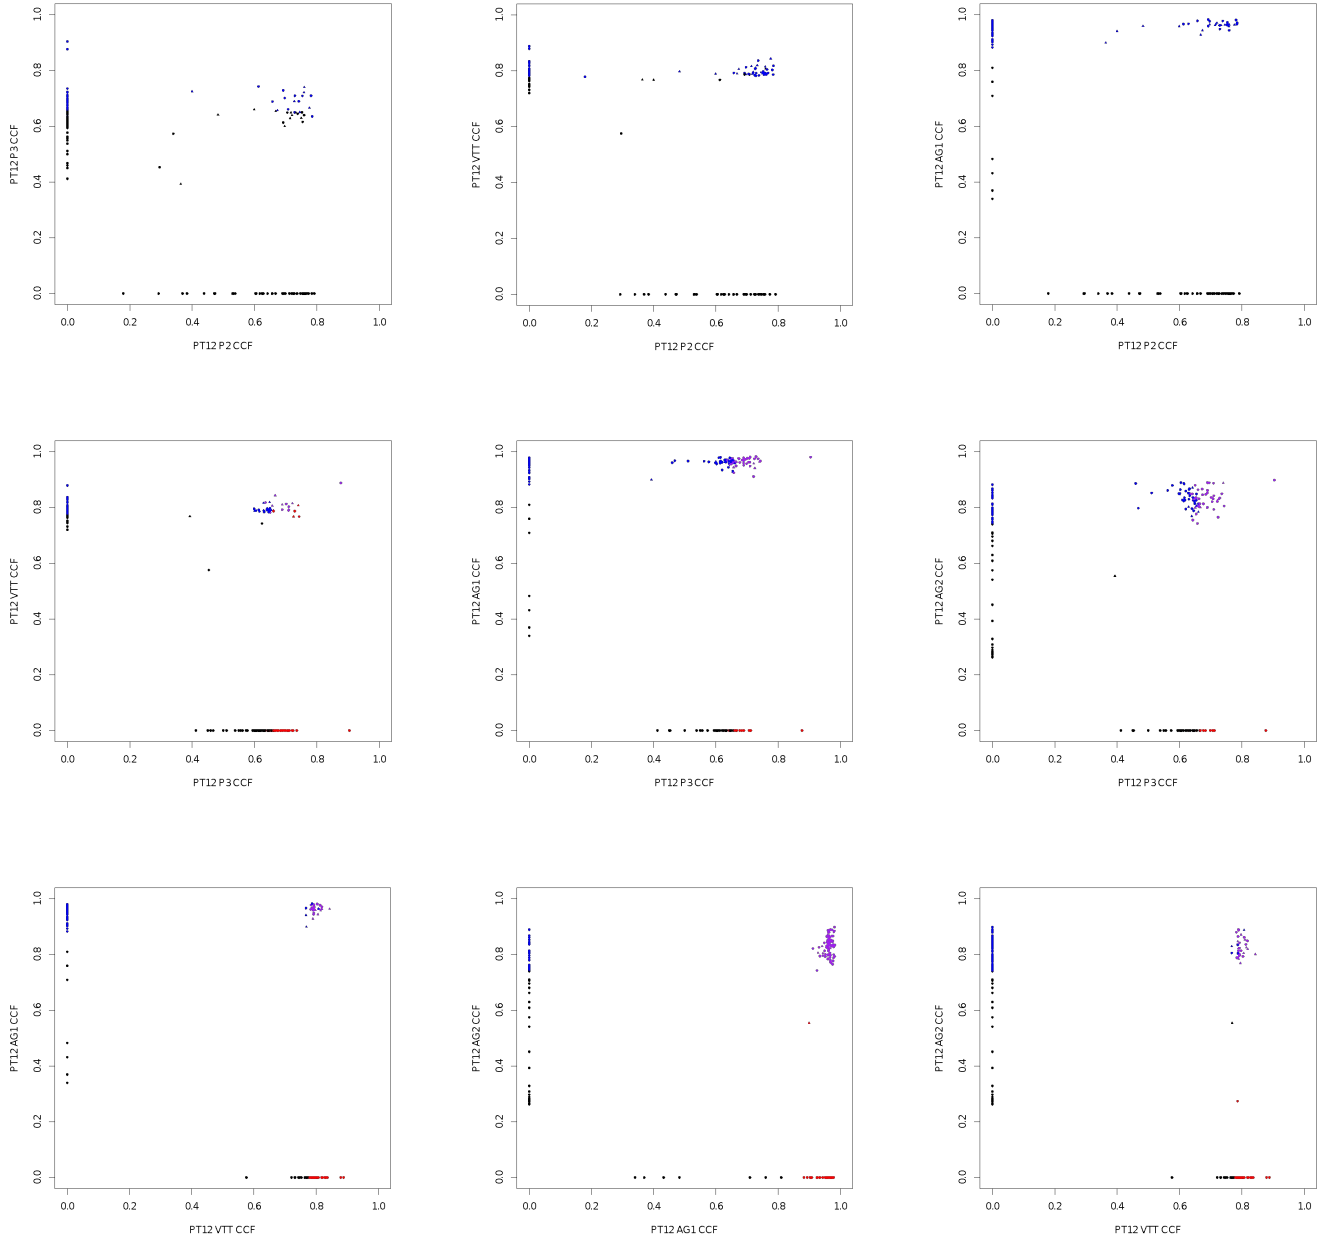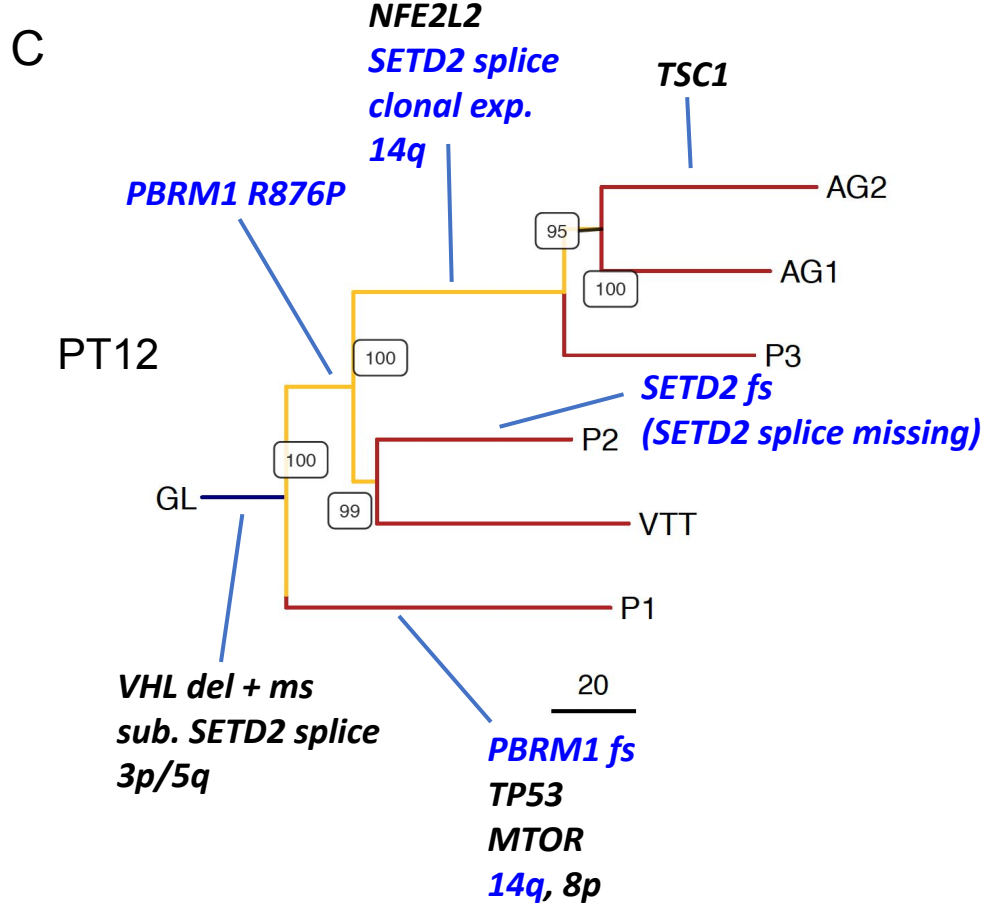



Figure S14.

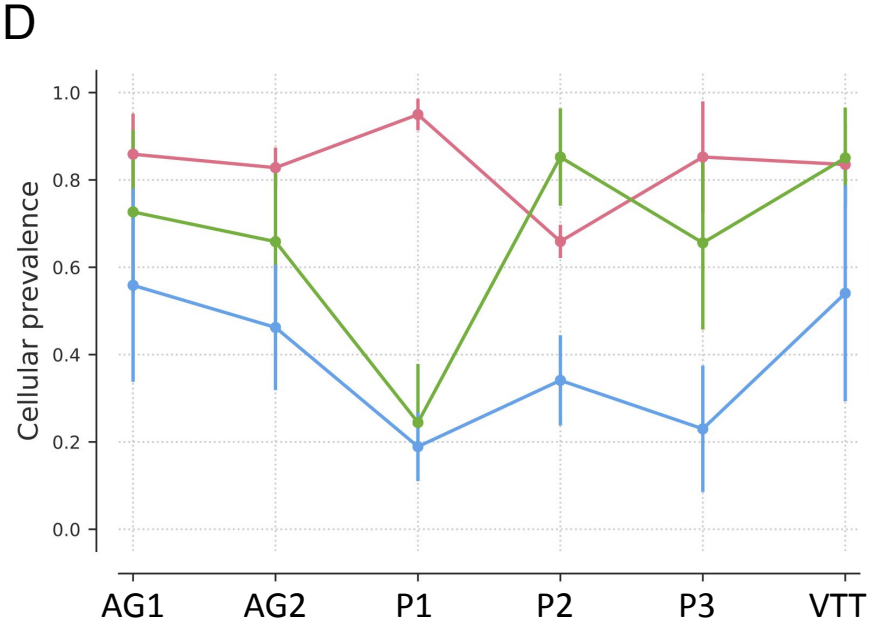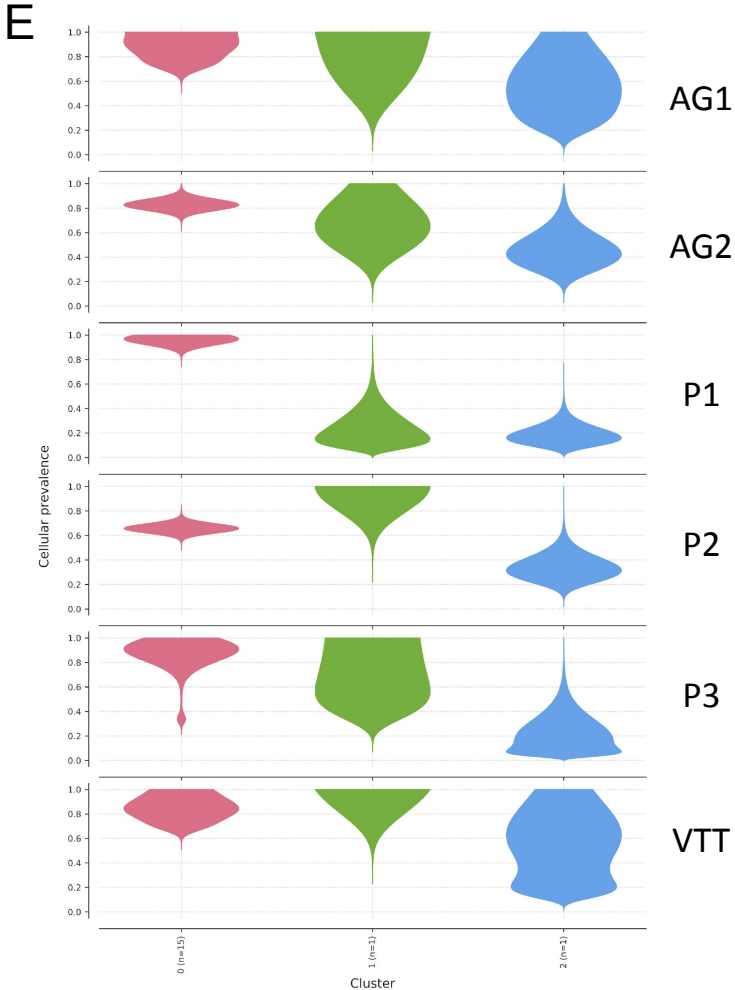

# Figure S15.

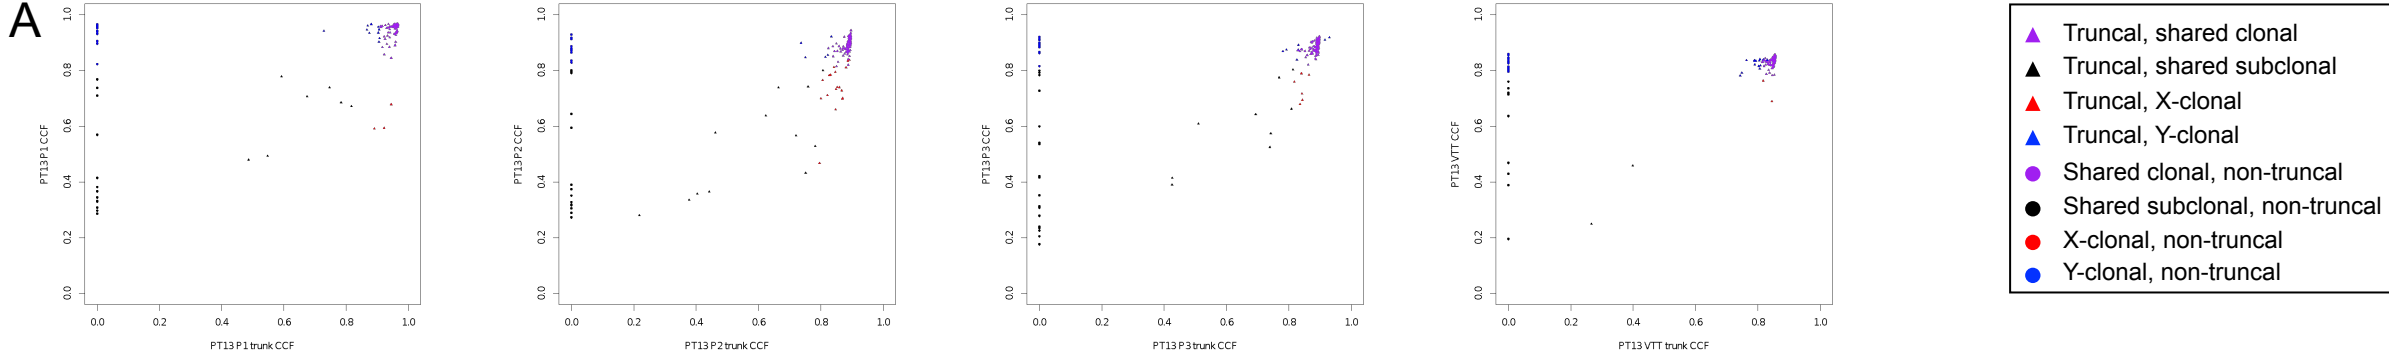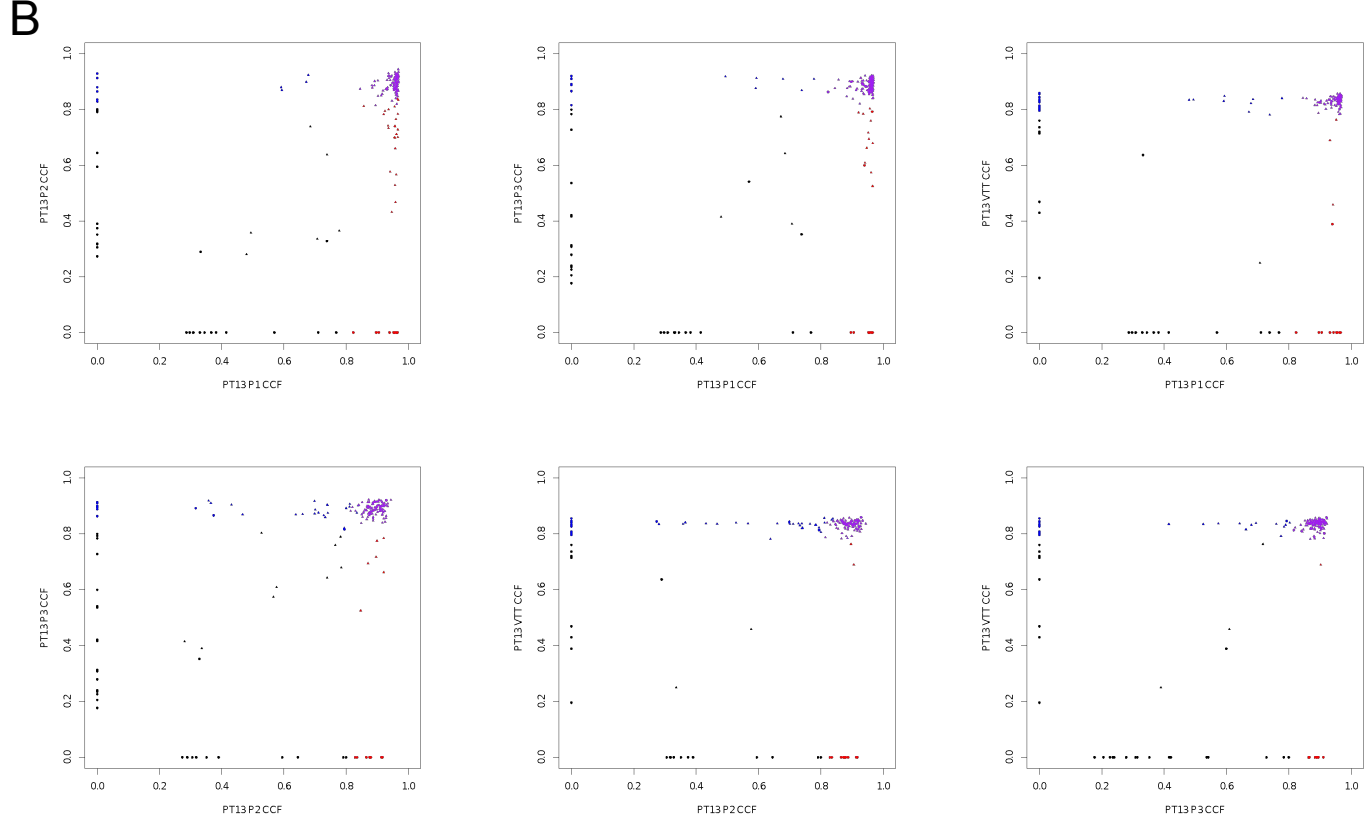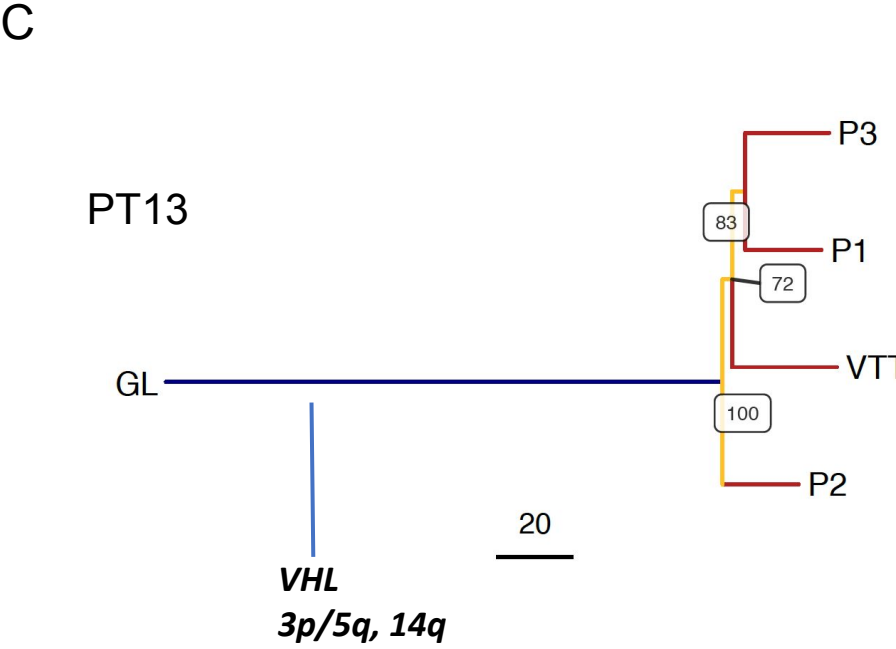

Figure S15.

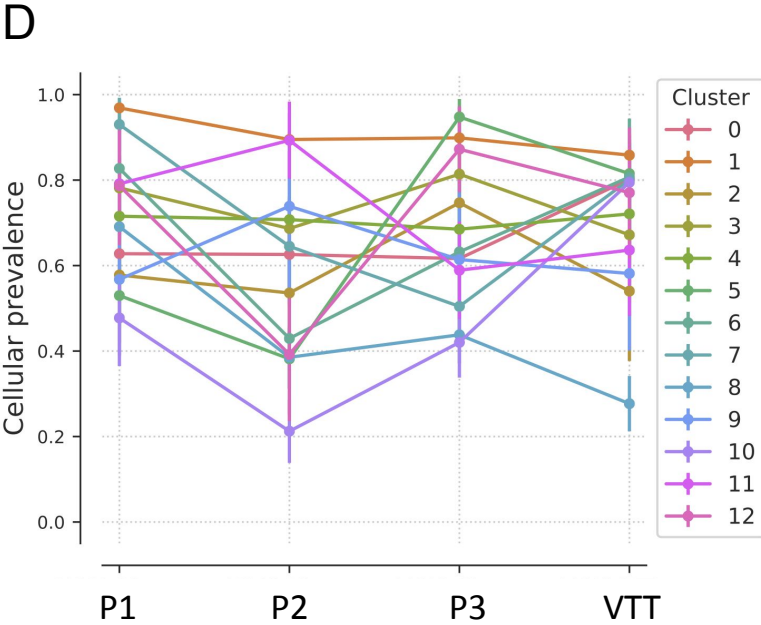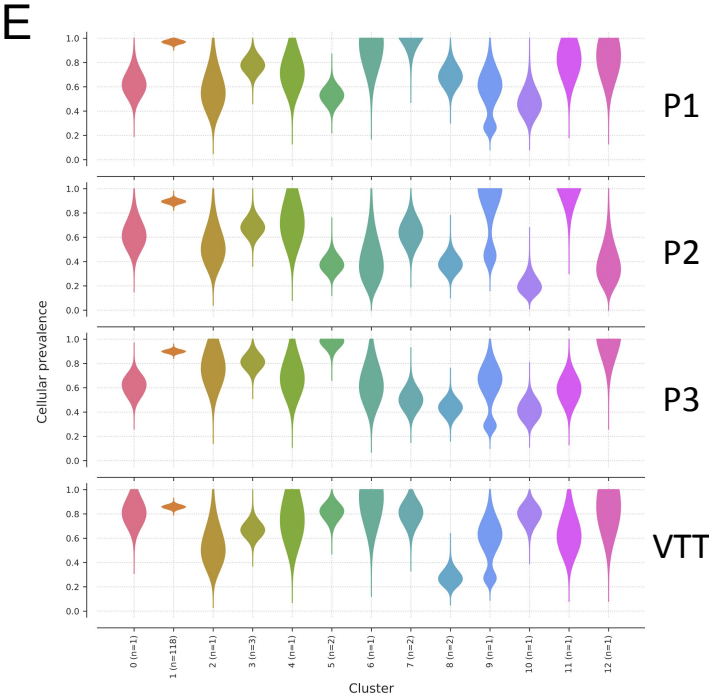

# Figure S16.

A

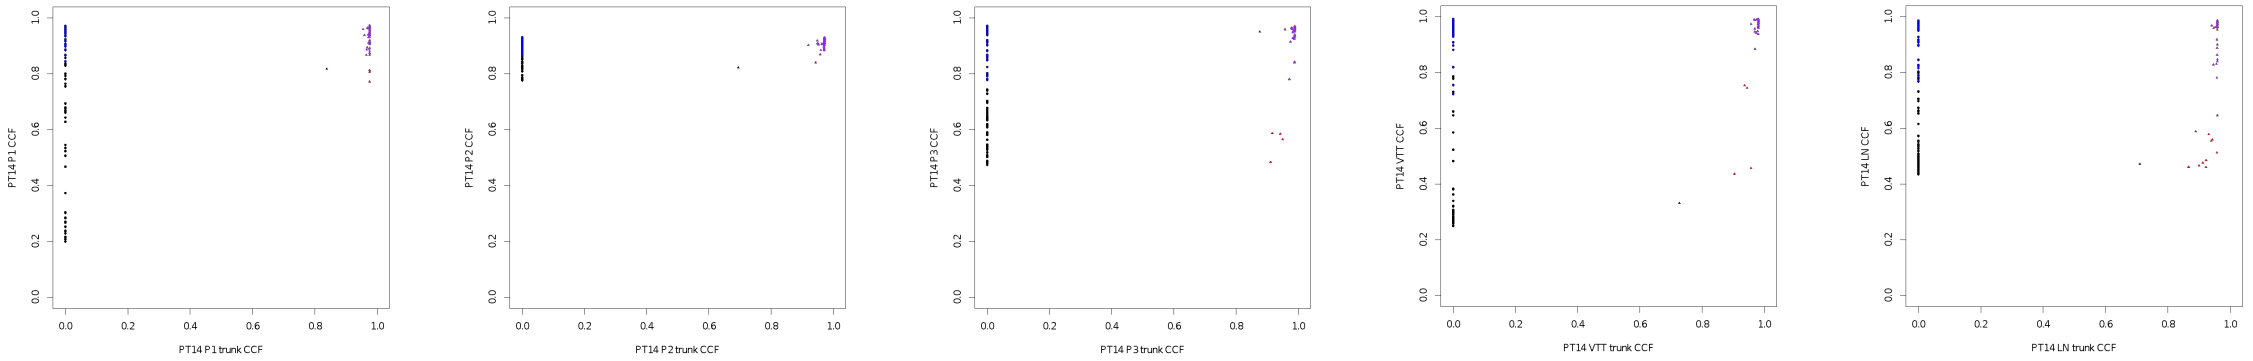

B

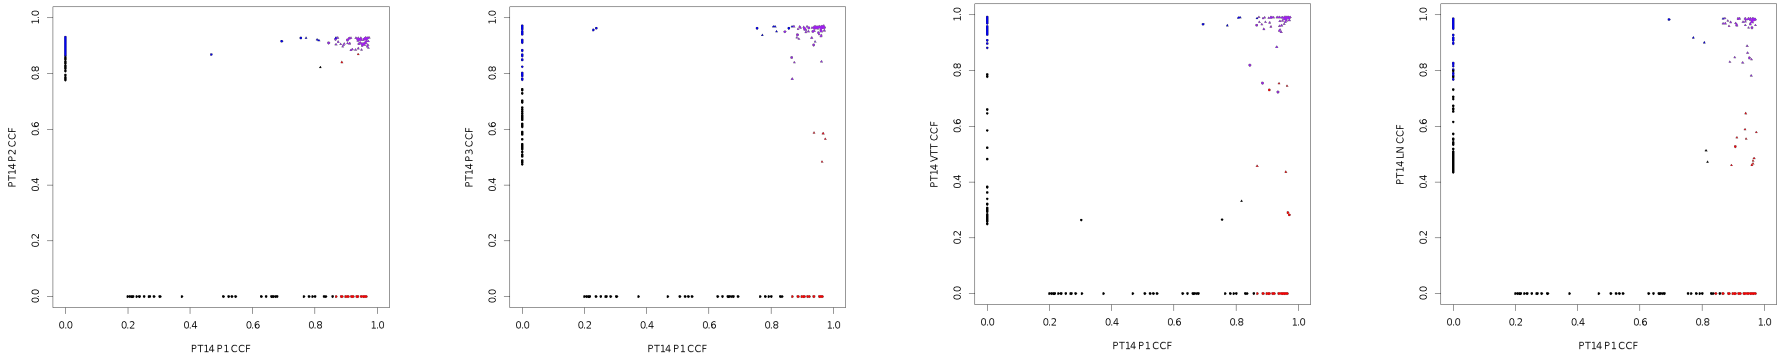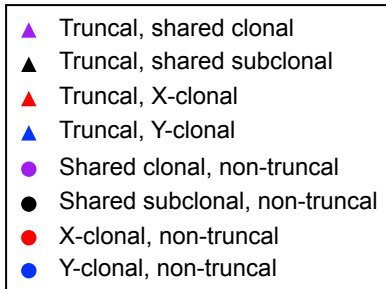

**Figure S16.**

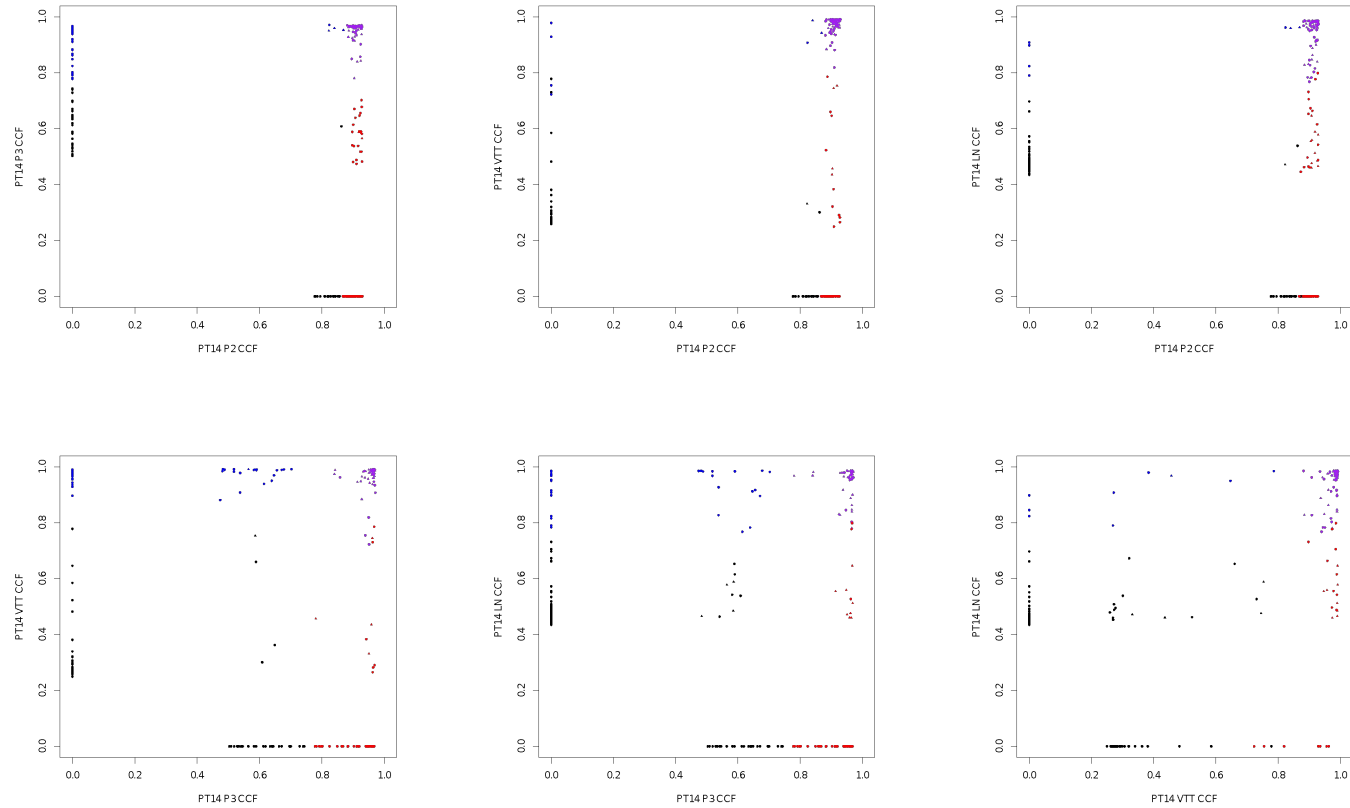

**C**

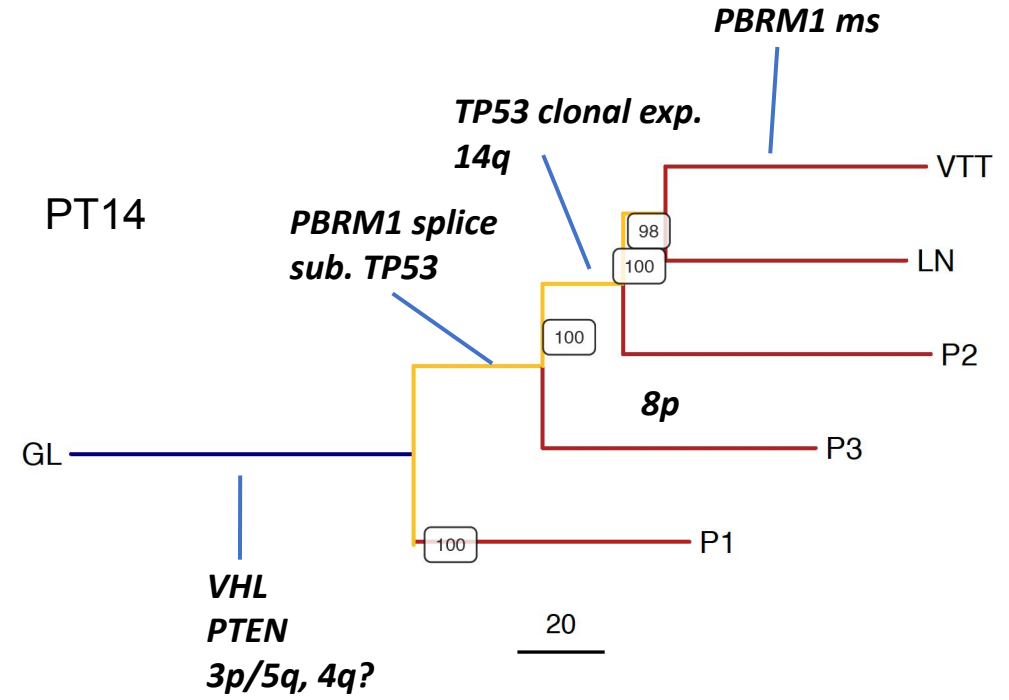

**Figure S16.**

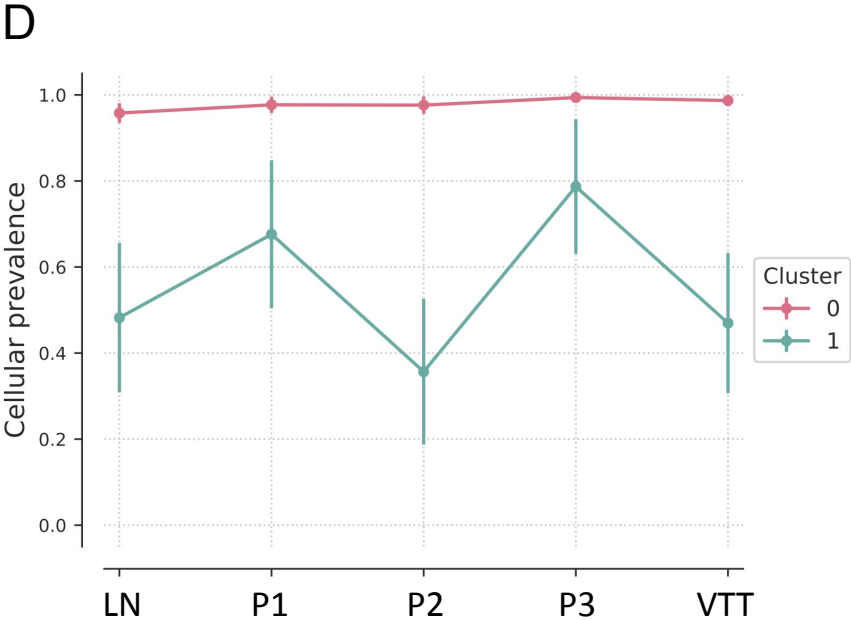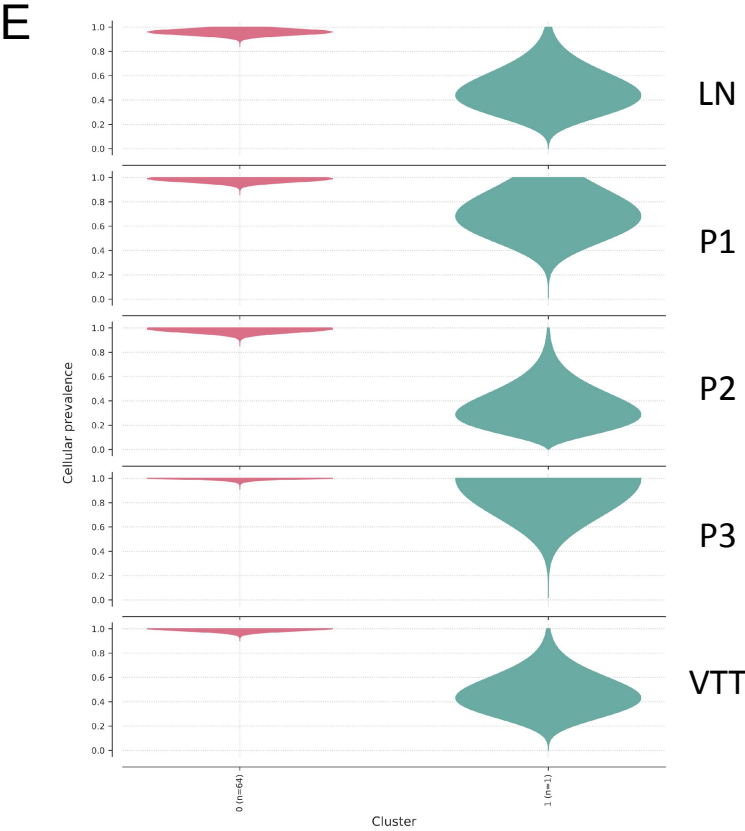

# Figure S17.

A

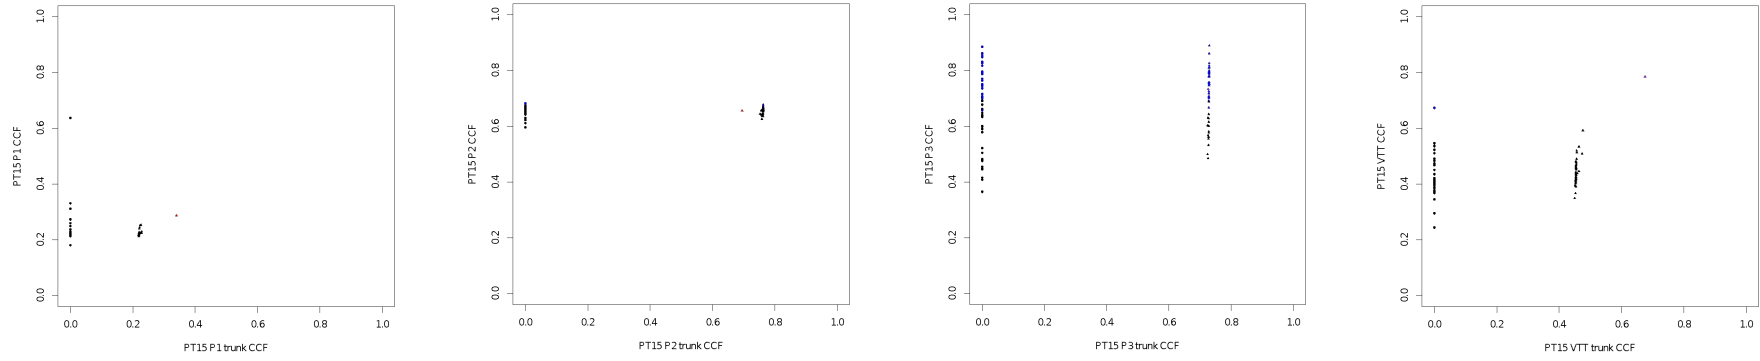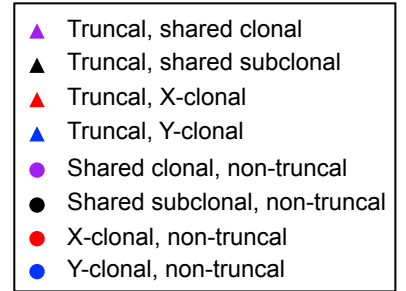

B

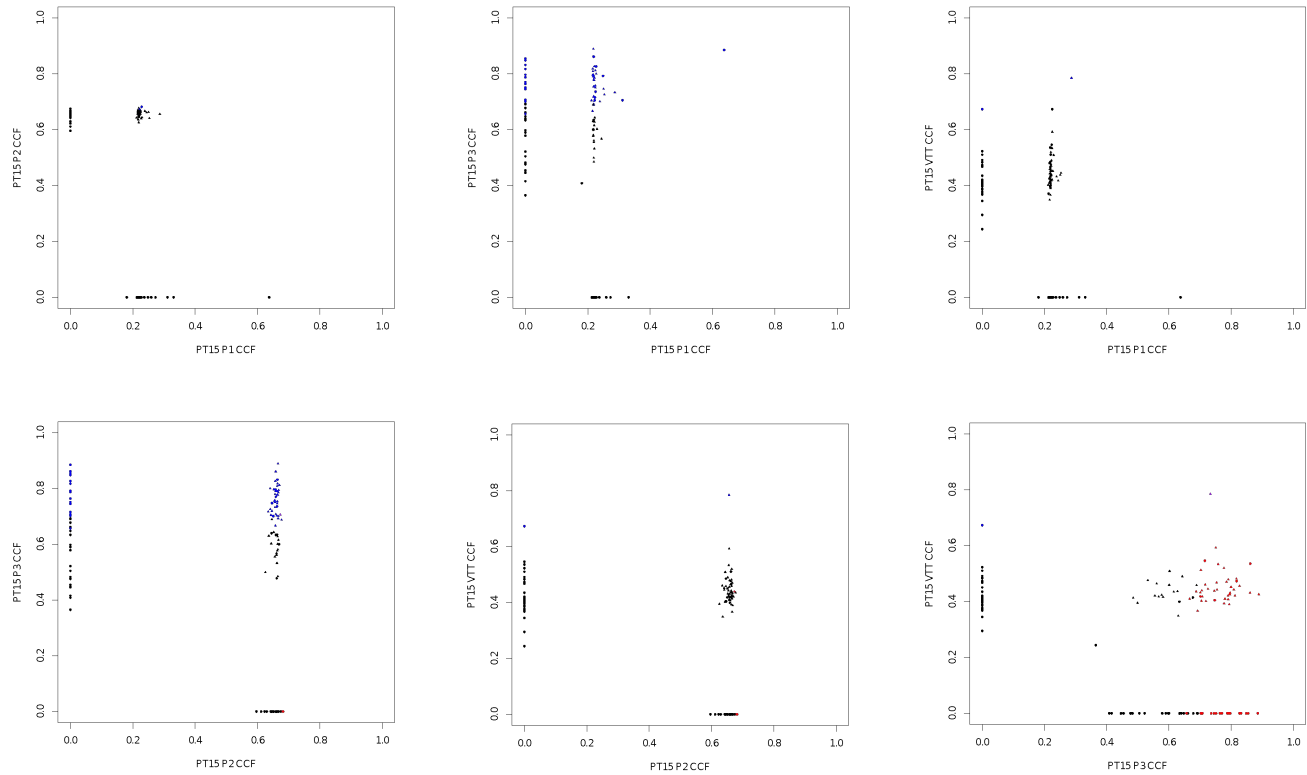

C

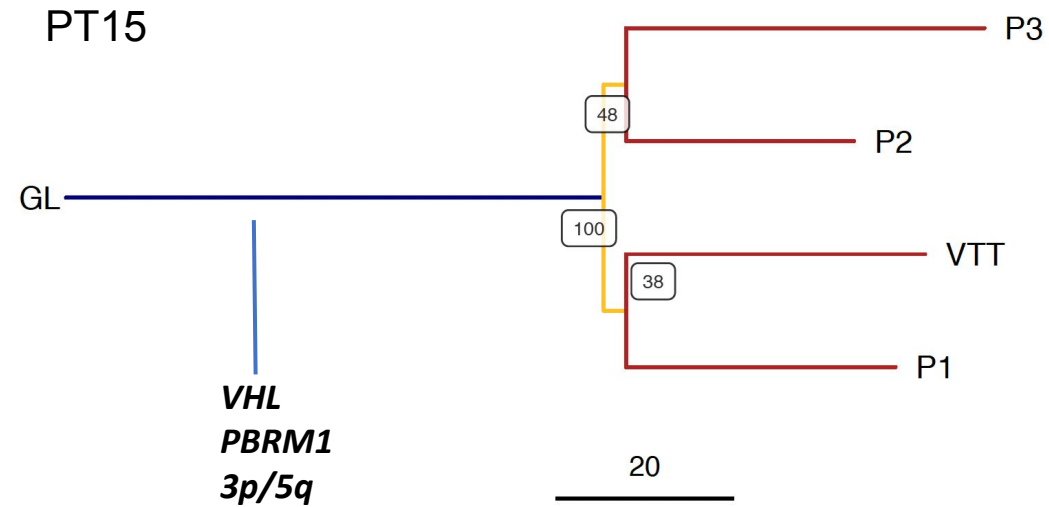

**Figure S17.**

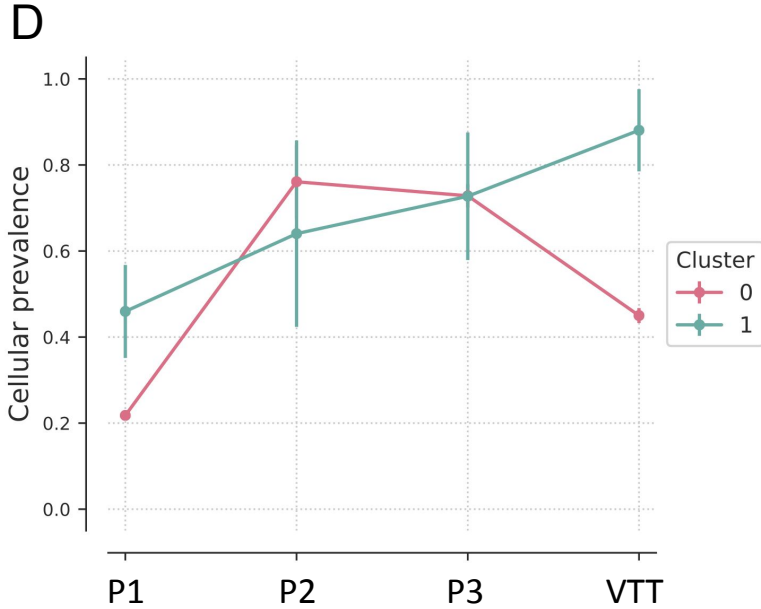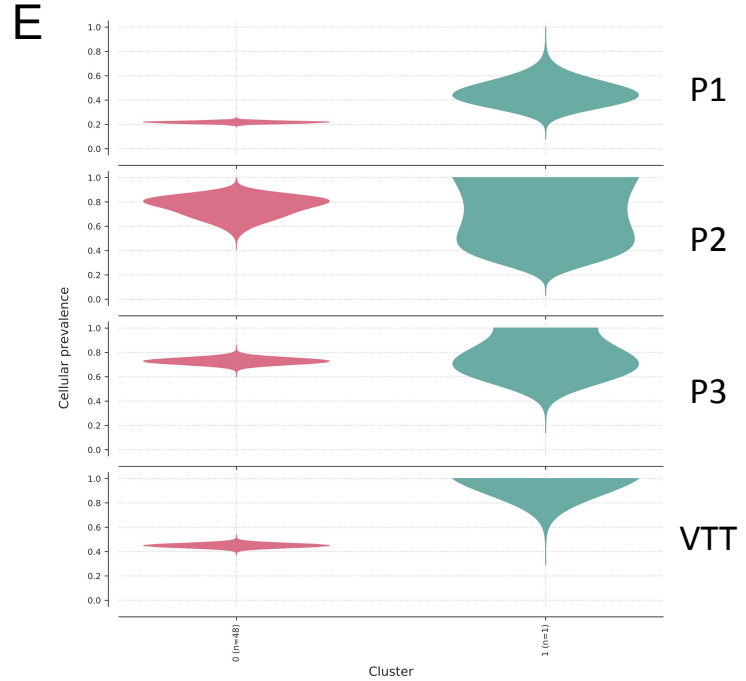



# Figure S18.

## A

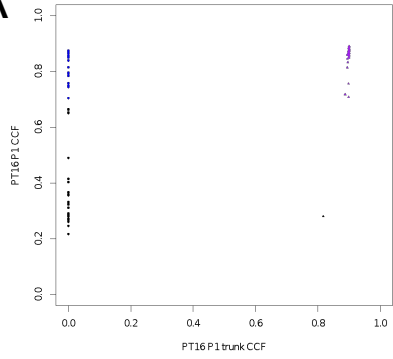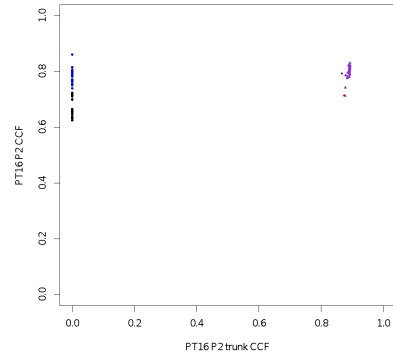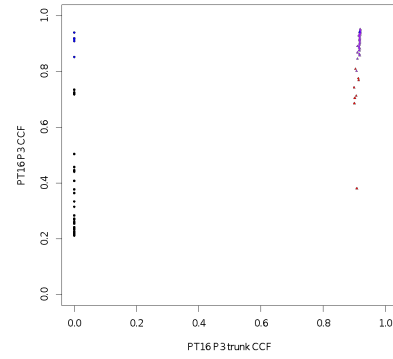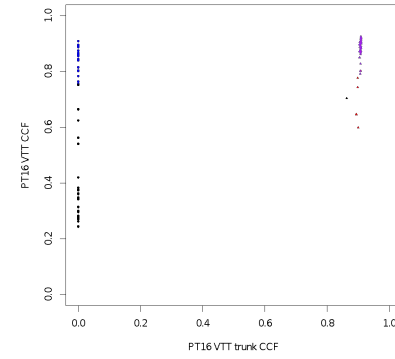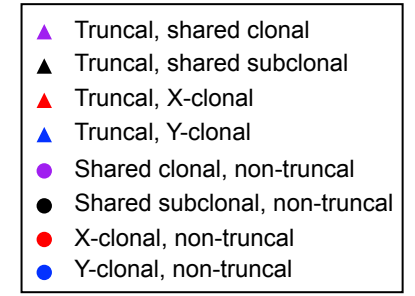

## B

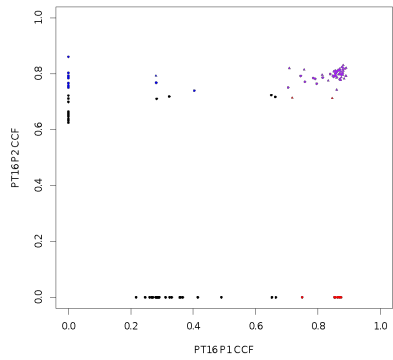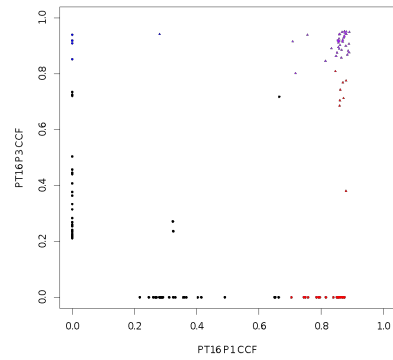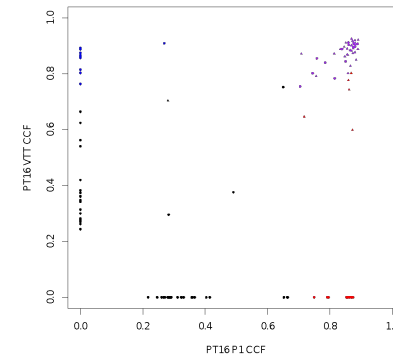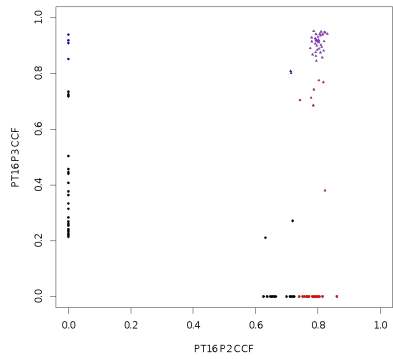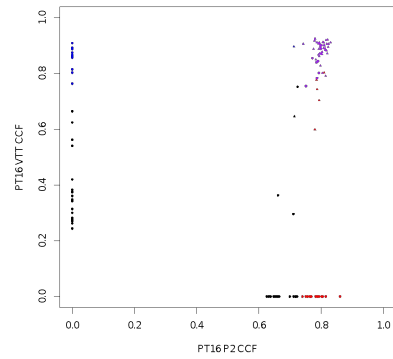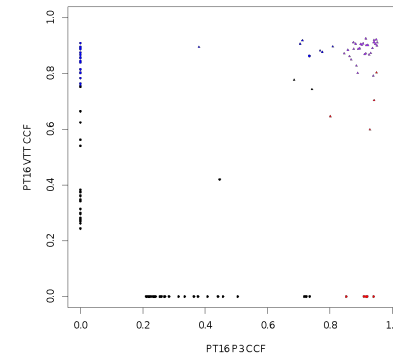

## C

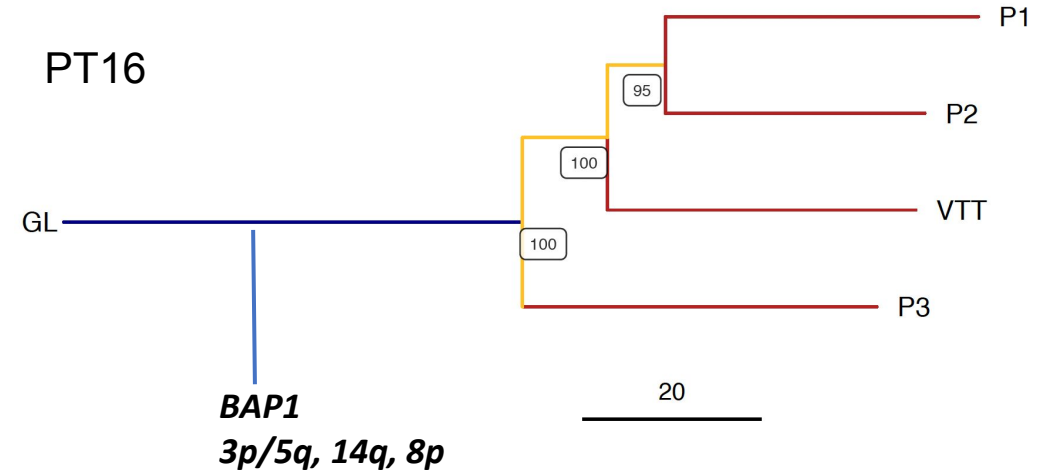

**Figure S18.**

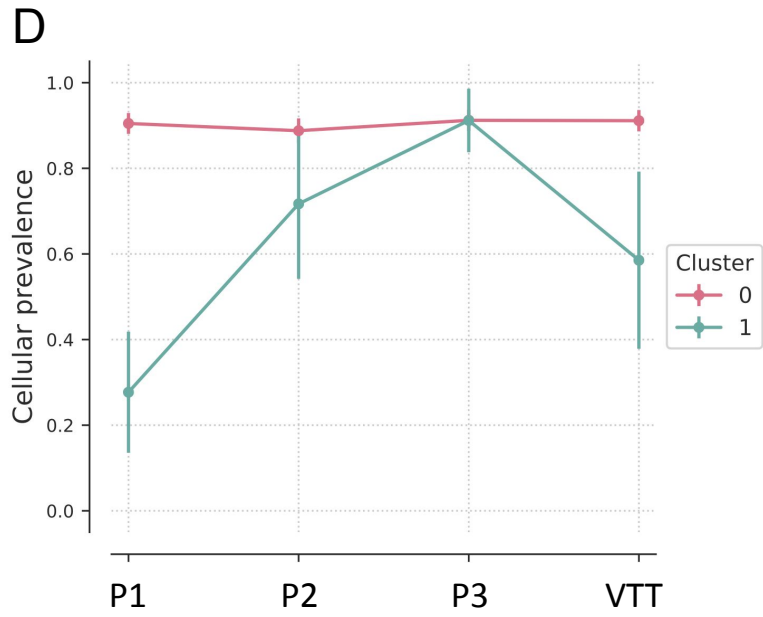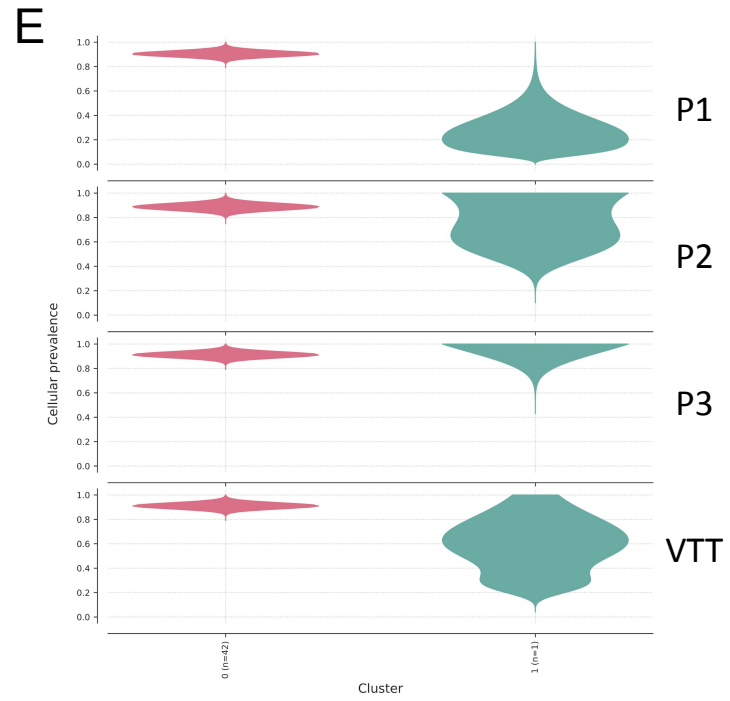

**Figures S3-S18.** Integrative evolutionary analysis of each tumor, overlaying mutation clonality, phylogenies, and driver alterations. Two-way cancer cell fraction (CCF) plots show (A) all mutations from each tumor region versus truncal mutations, and (B) all possible pairs of tumor regions. (C) Tumor phylogenies annotated with driver alterations. Alterations in blue indicate parallel mutations. “Sub.”, subclonal; “clonal exp.”, clonal expansion; †, TP53 clone in PT2 persists only in P3, VTT1, VTT2, P2 (minor subclone in P2). (D) Average CCF value with standard error for each mutation cluster (clone) across tumor regions, as determined by PyClone. Only mutations present in all regions are included. (E) CCF density distributions for each mutation cluster (clone) across tumor regions, as determined by PyClone. Numbers of mutations per cluster are indicated in parentheses at bottom.

**Figure S19.**

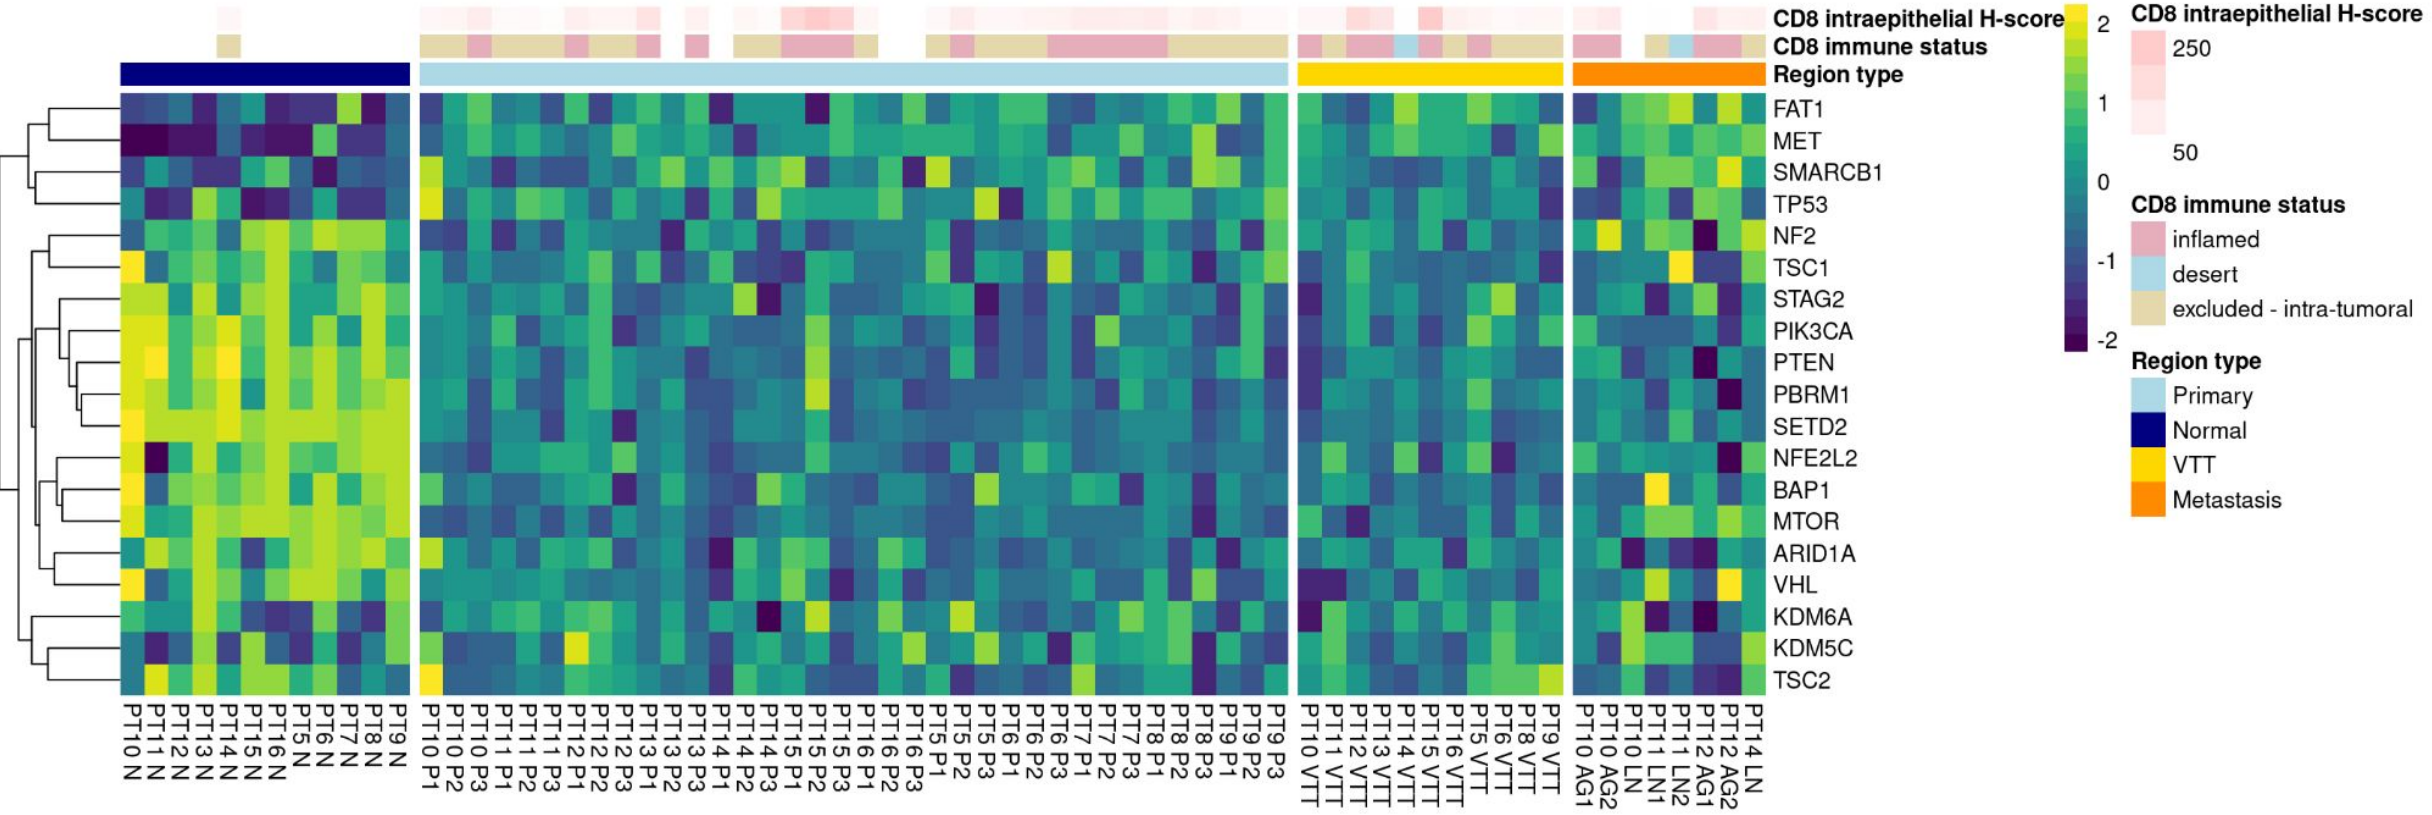

**Figure S19.** Expression status of putative driver genes across all regions of all patients, excepting CSMD3, which had no uniquely mapped counts in any region. Expression values were normalized by variance-stabilizing transformation, then turned into z-scores normalized within each gene and patient prior to visualization.

# Figure S20.

**A**

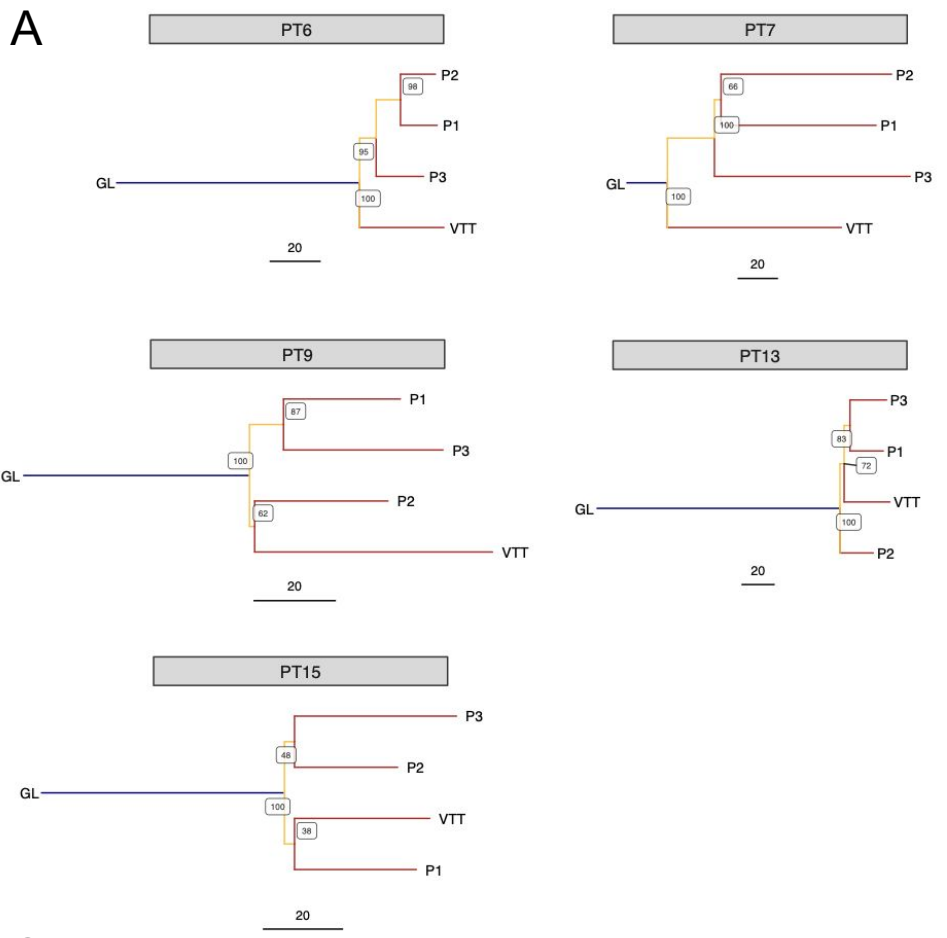

**B**

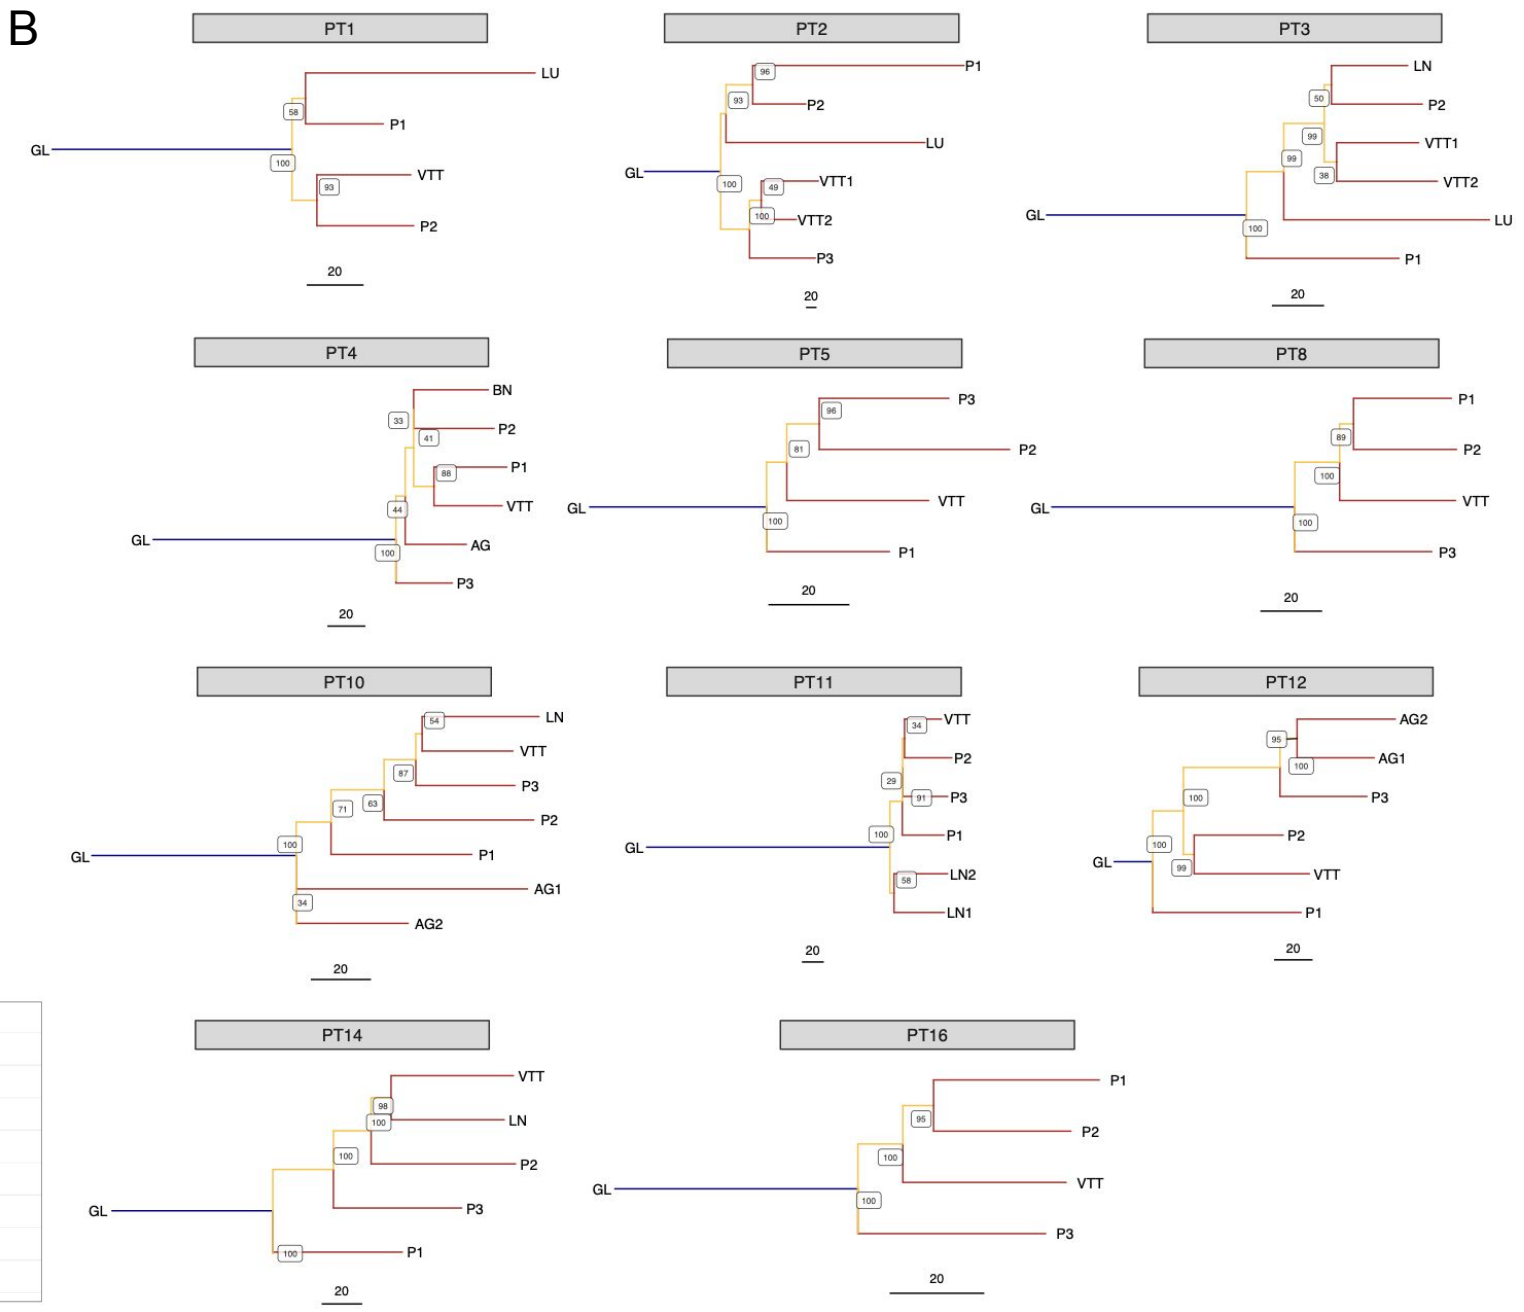

**C**

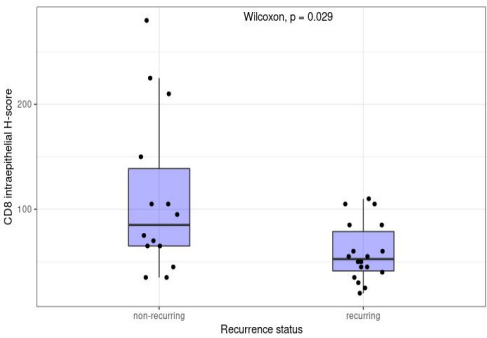

**D**

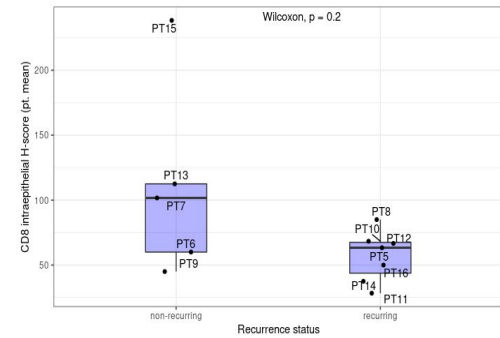

**Figure S20.** Comparison of phylogenetic trees and CD8 IHC for non-recurring versus recurring tumors. (A) Phylogenetic trees of non-recurring tumors. (B) Phylogenetic trees of non-recurring tumors. (C) CD8 intraepithelial H-scores for recurring versus non-recurring tumors for all primary tumor regions included in panel A. (D) Patient averages (mean) of the CD8 intraepithelial H-scores for recurring versus non-recurring tumors.



Figure S21.

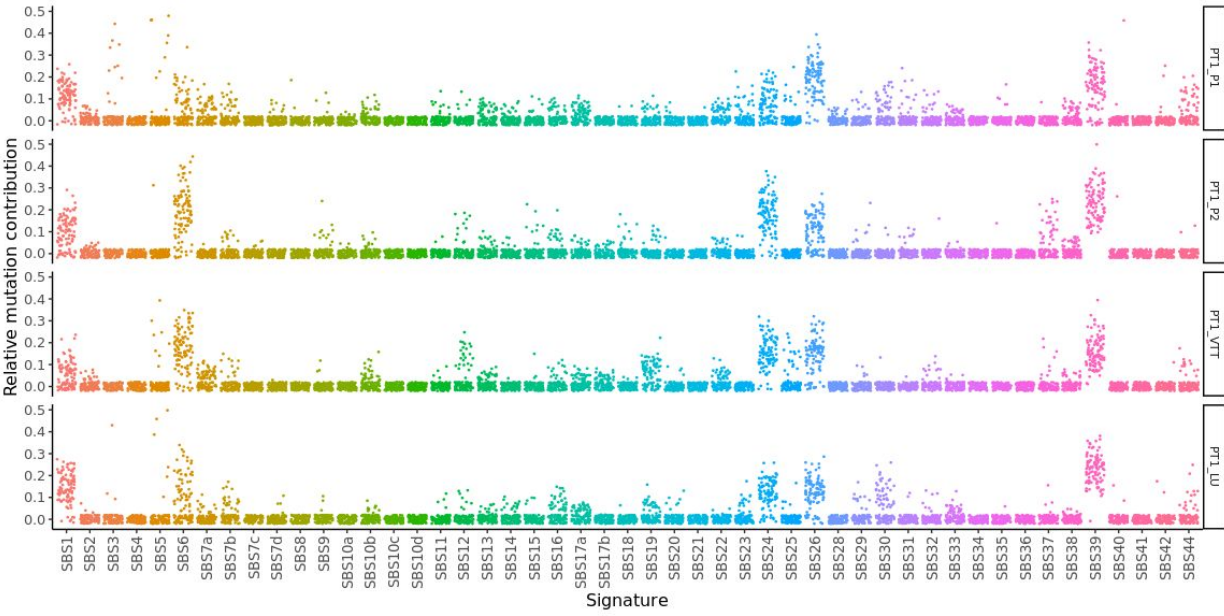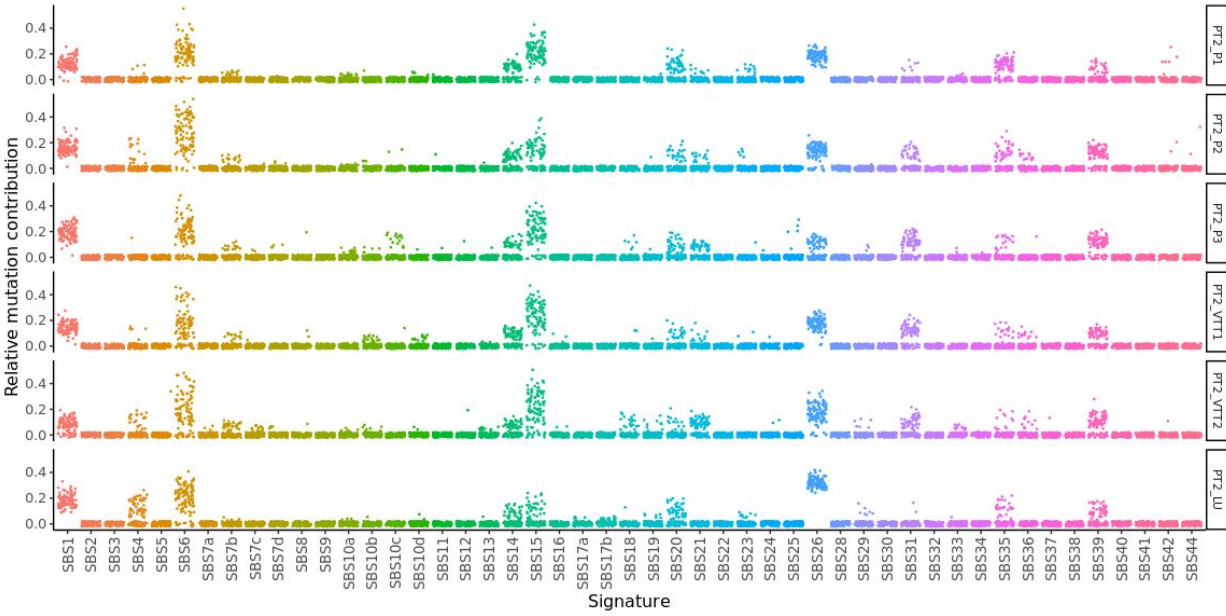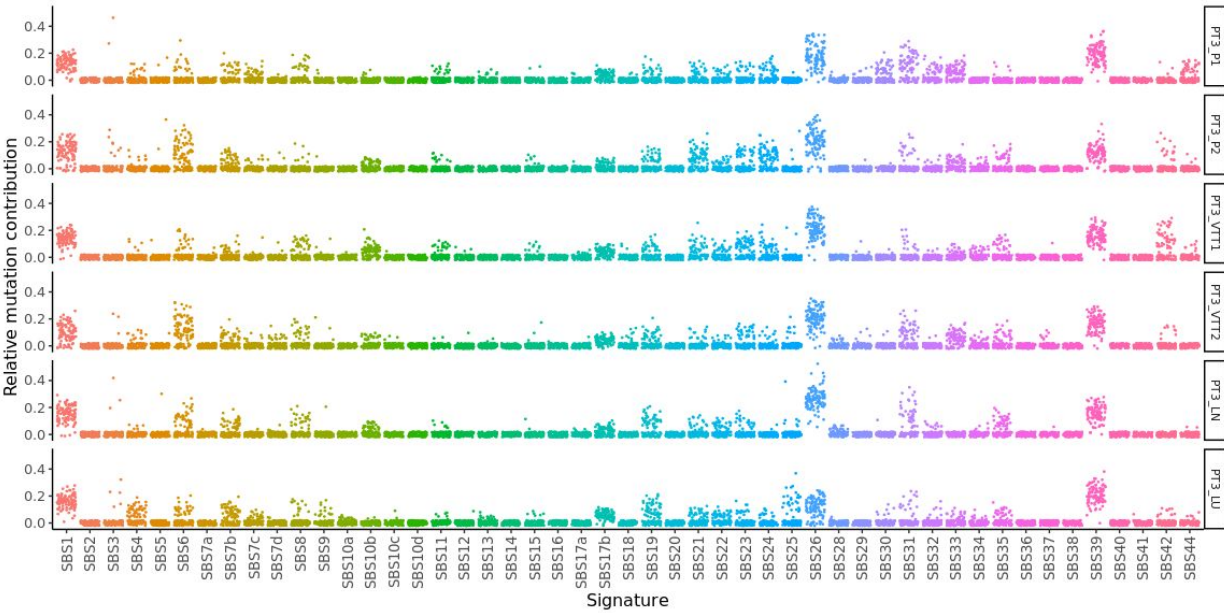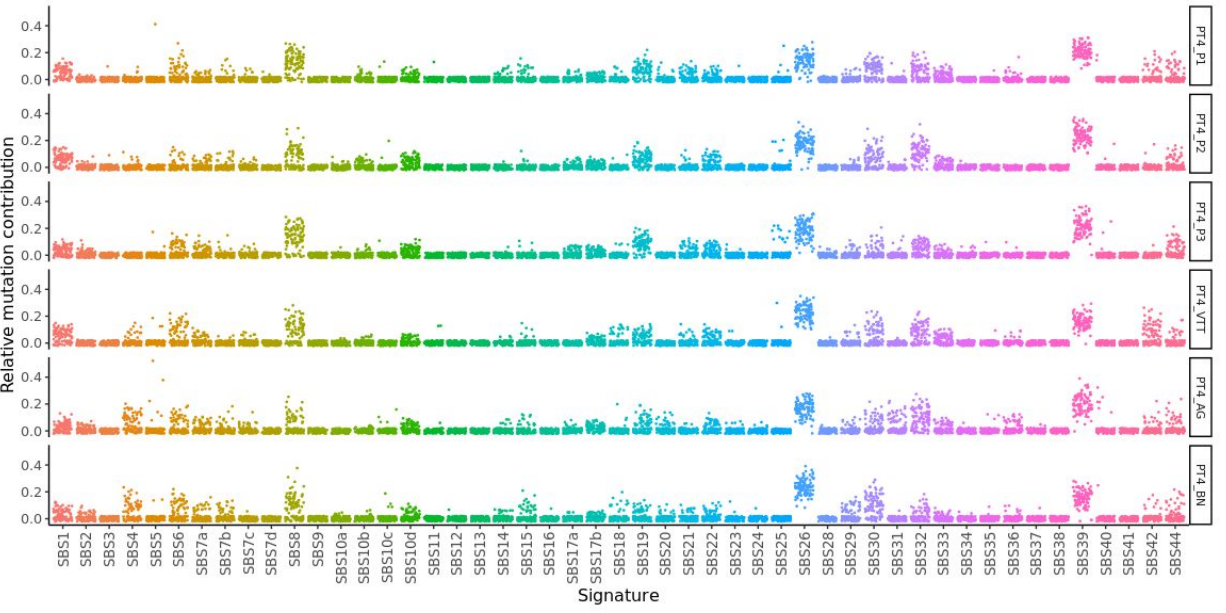



# Figure S21.

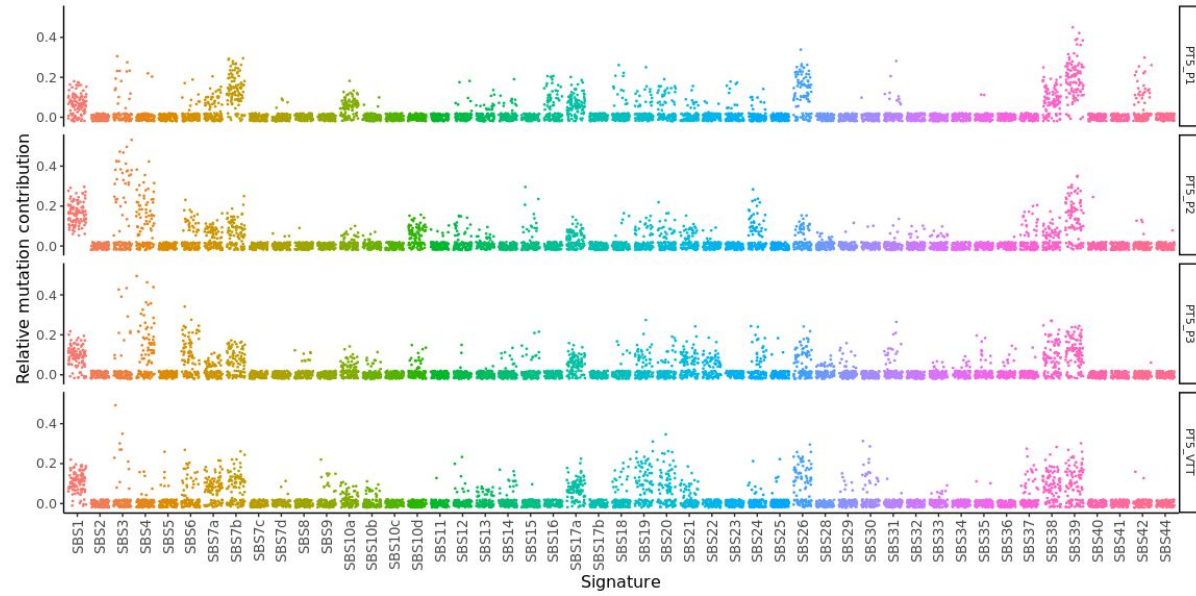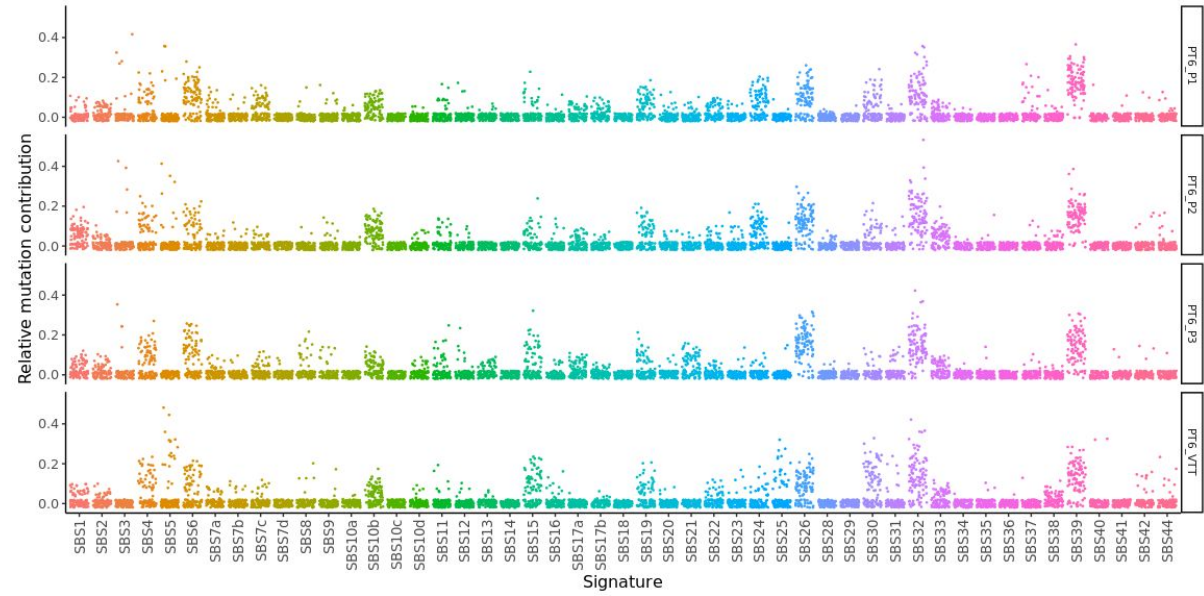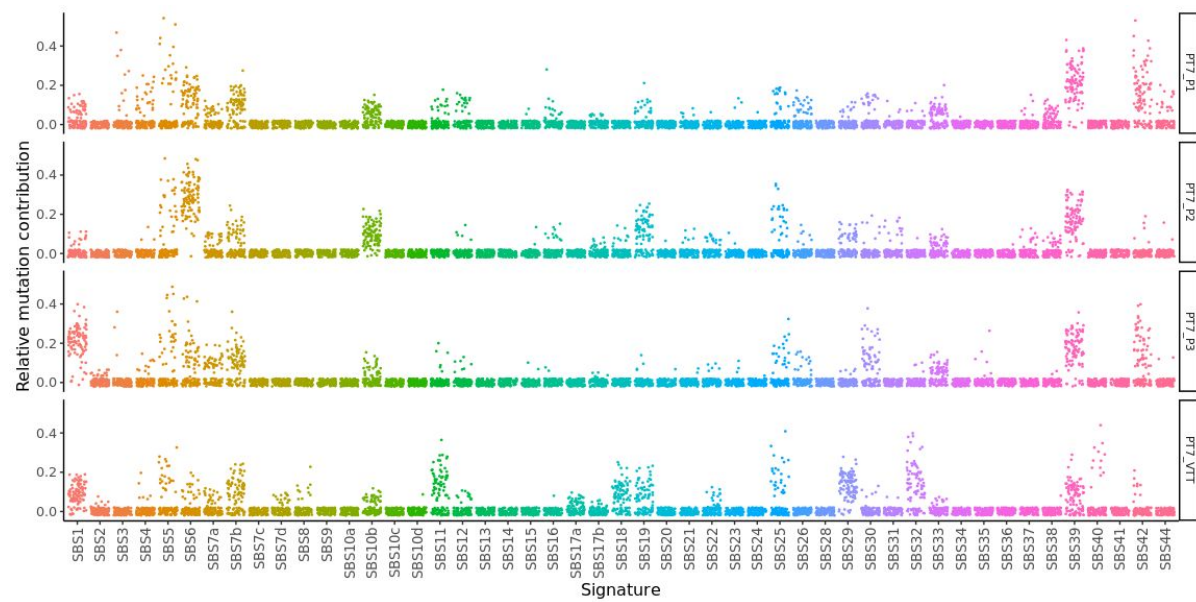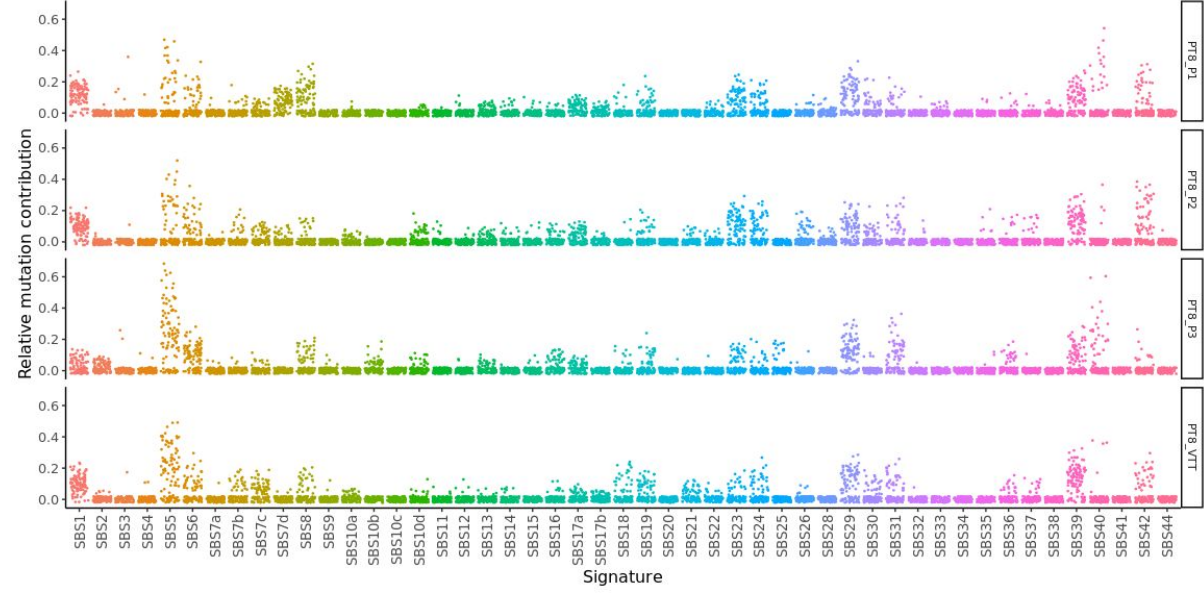



Figure S21.

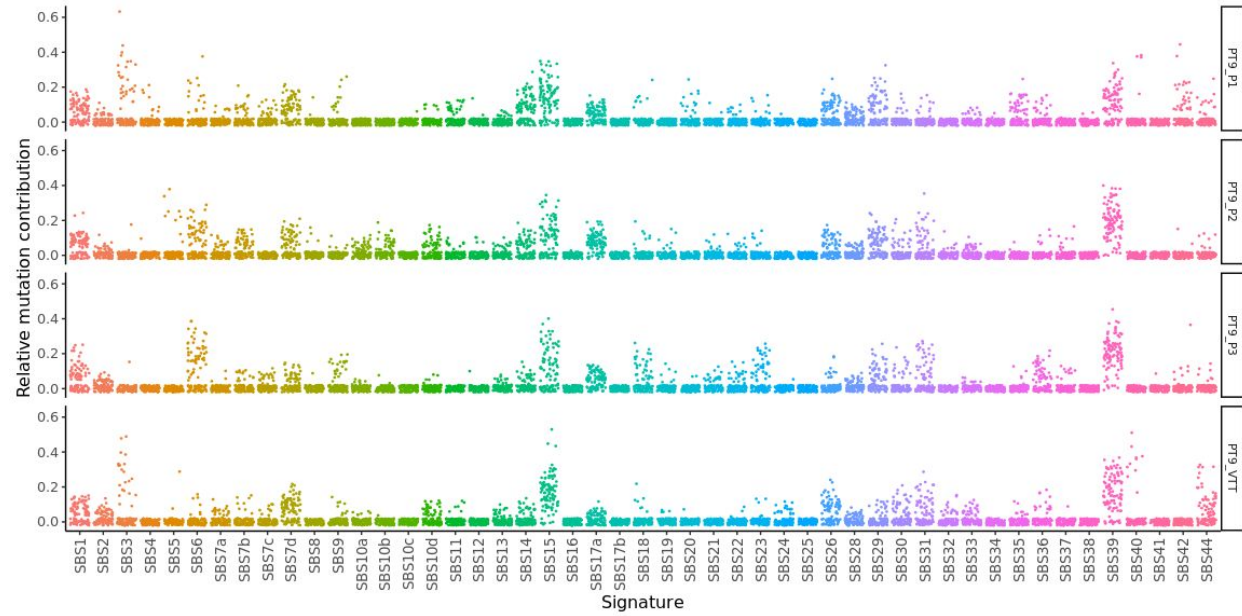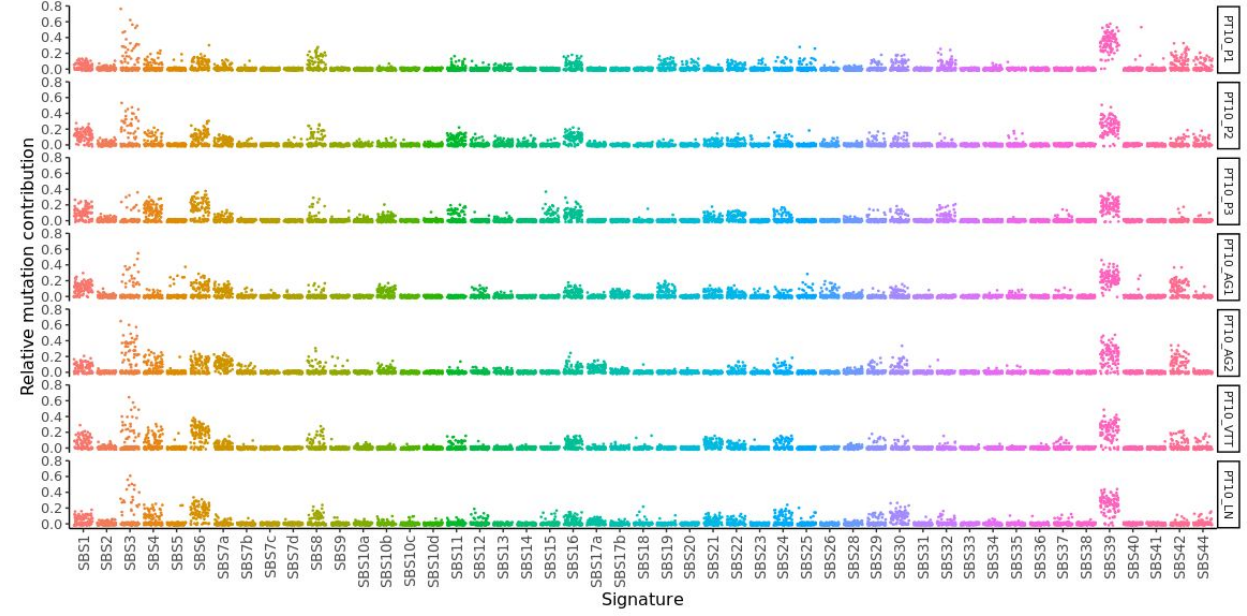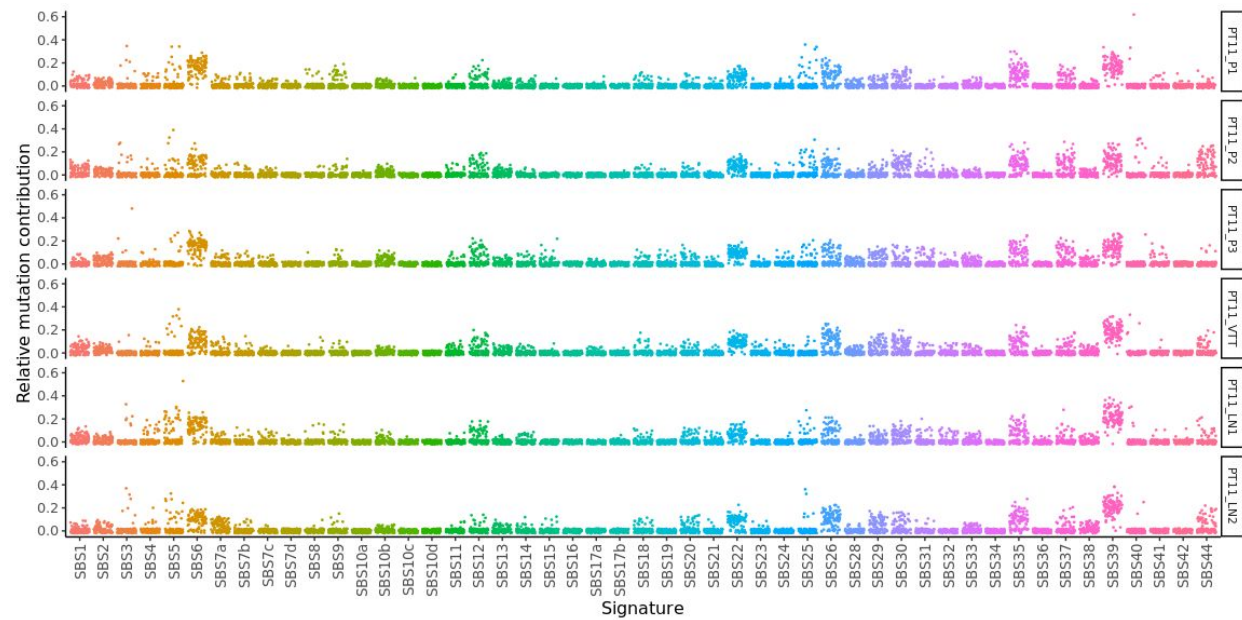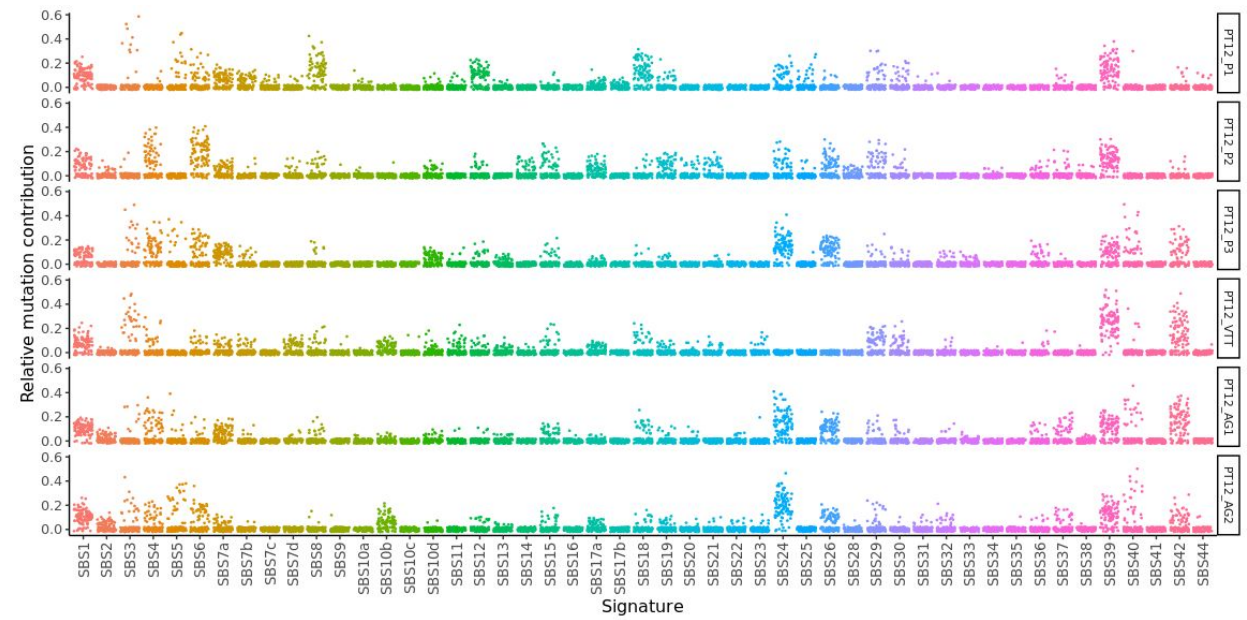



Figure S21.

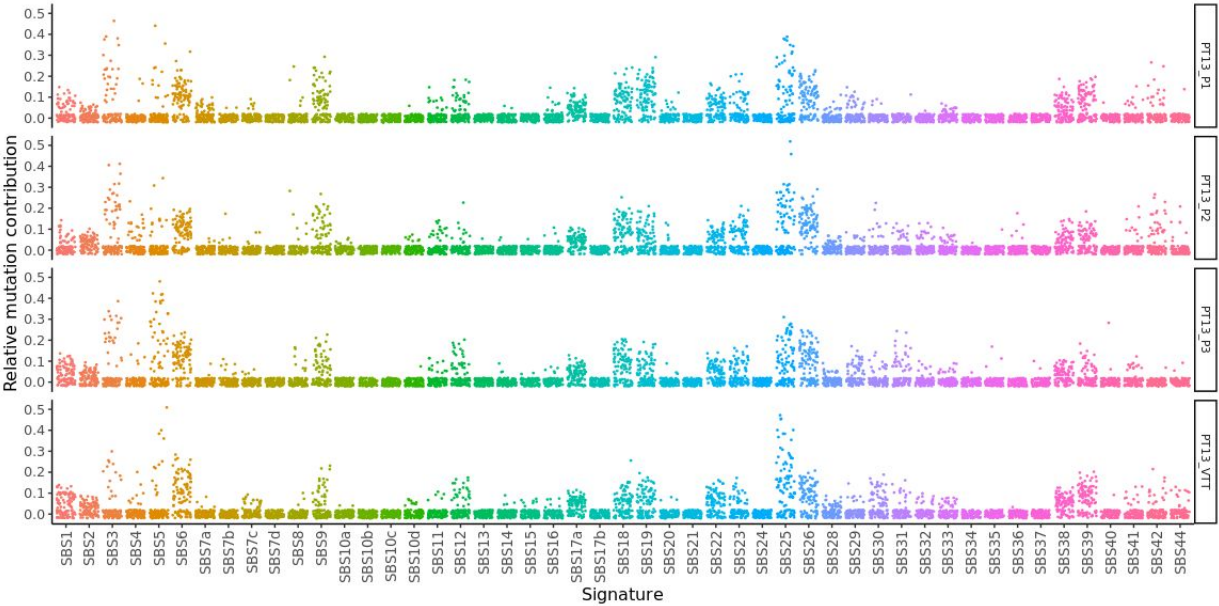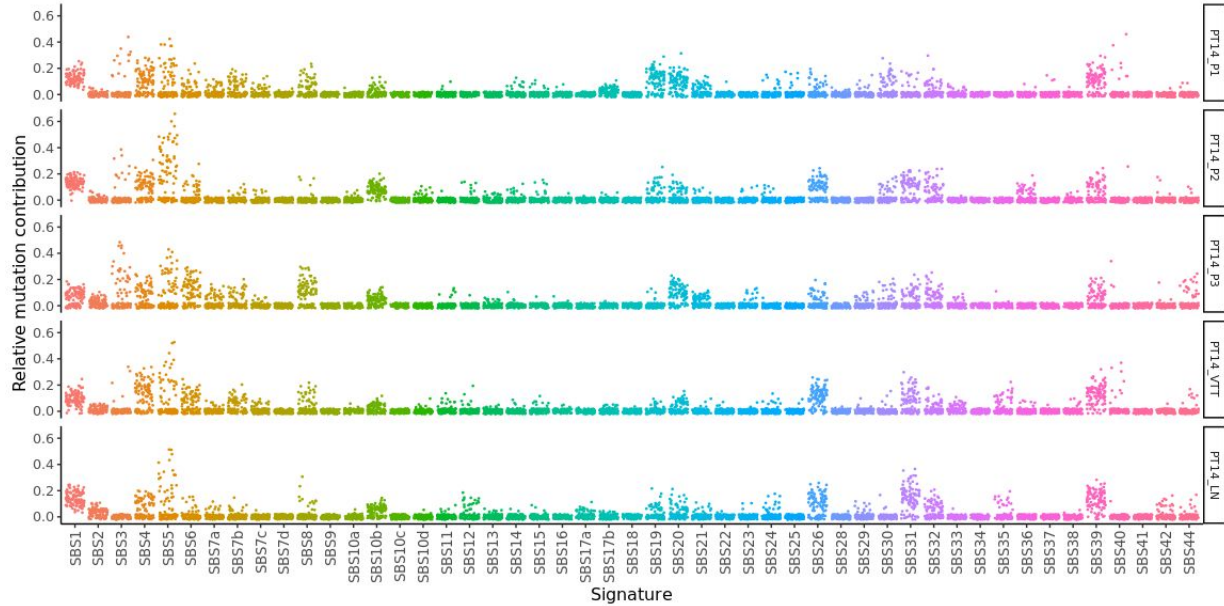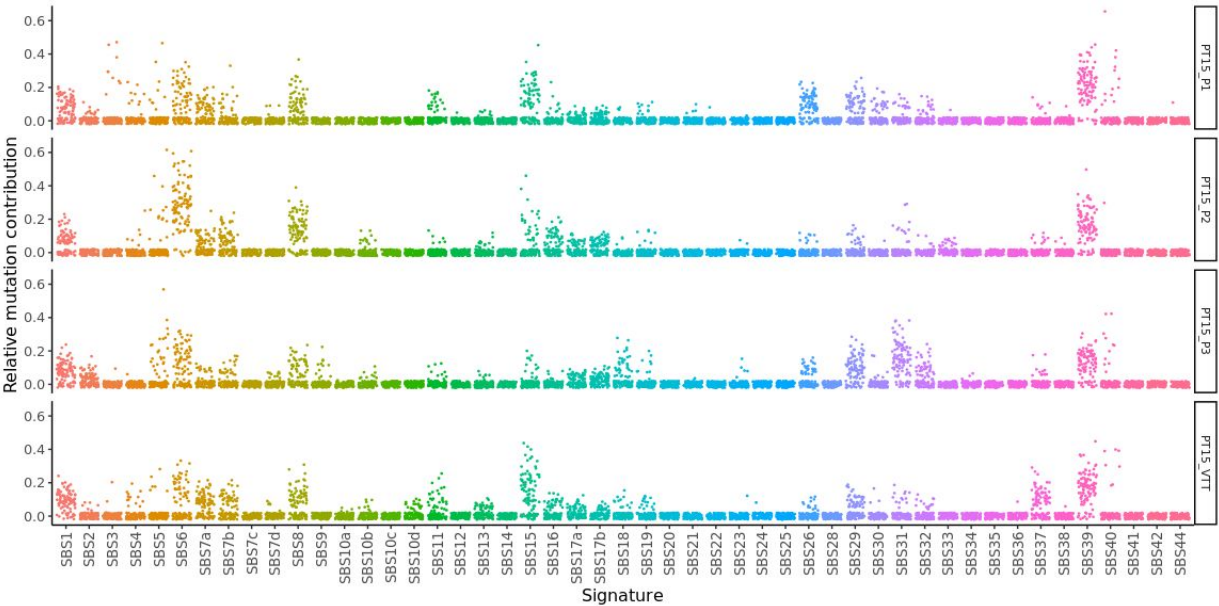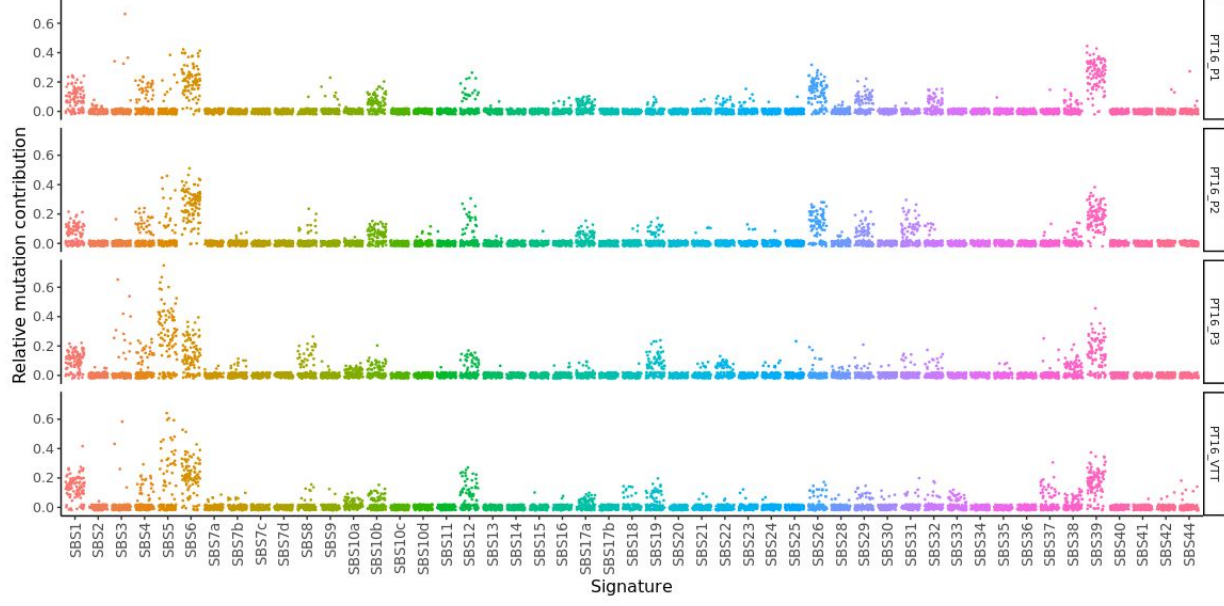

**Figure S21.** Relative contribution of the 49 Alexandrov mutation signatures (37) to each sample, for all 100 bootstrap replicates.

# Figure S22.

## A

### Sample with nonzero median signature contributions

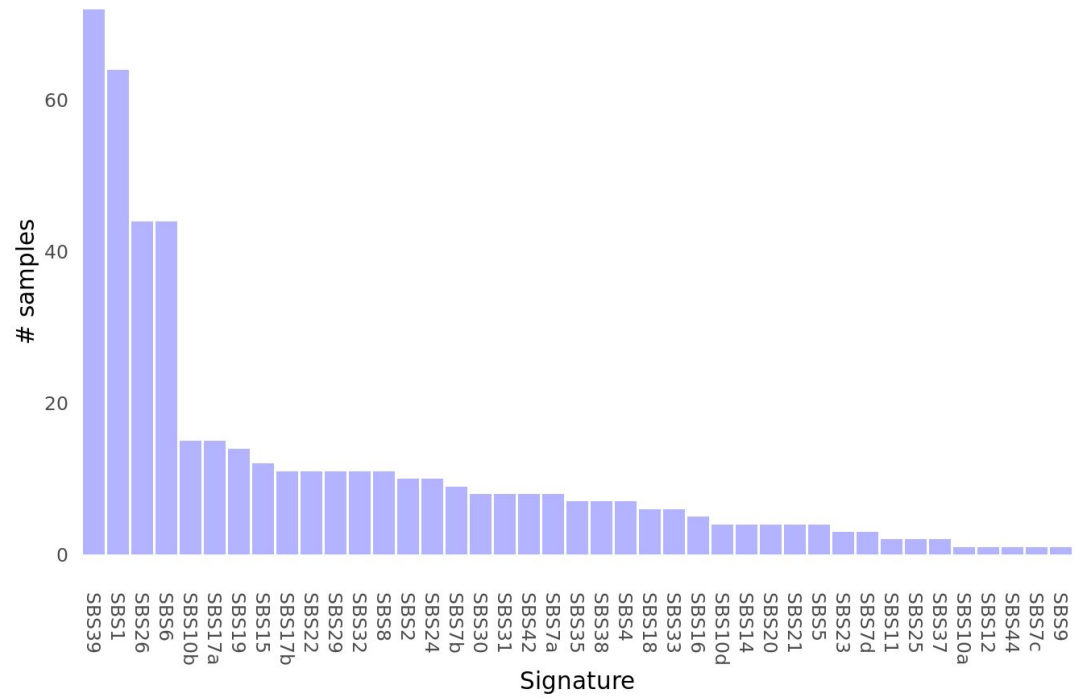

## B

### Patients with nonzero median signature contributions

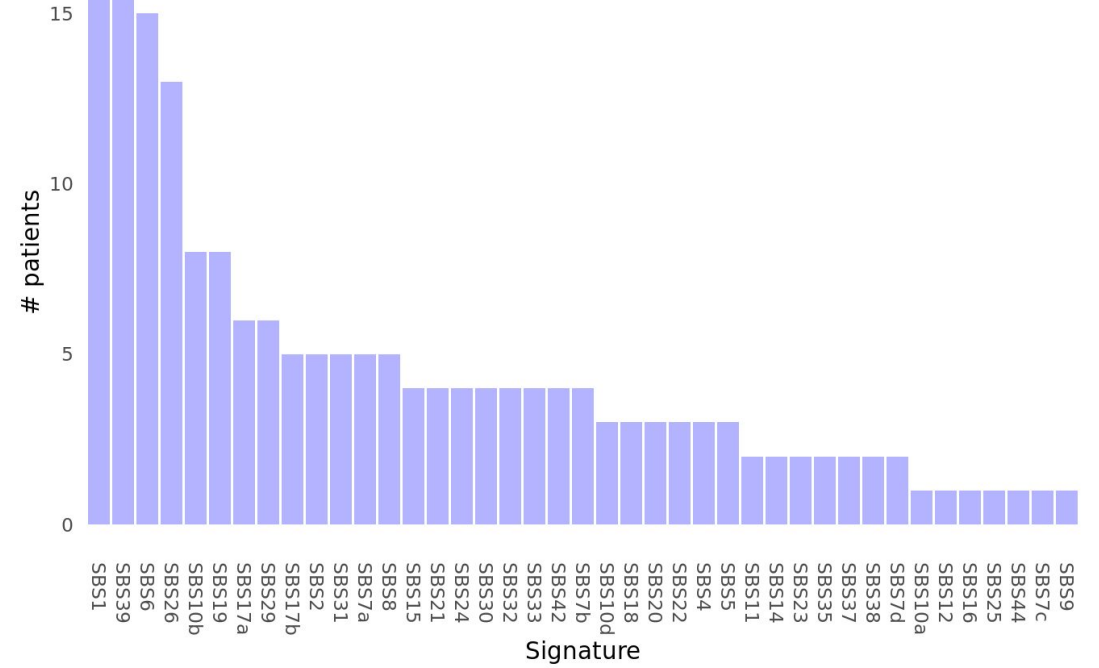

**Figure S22.** Number of a) samples and b) patients in whom a given mutation signature (of the 49 derived from reference (37)) has a non-zero median contribution over 100 bootstrap replicates.



Figure S23.

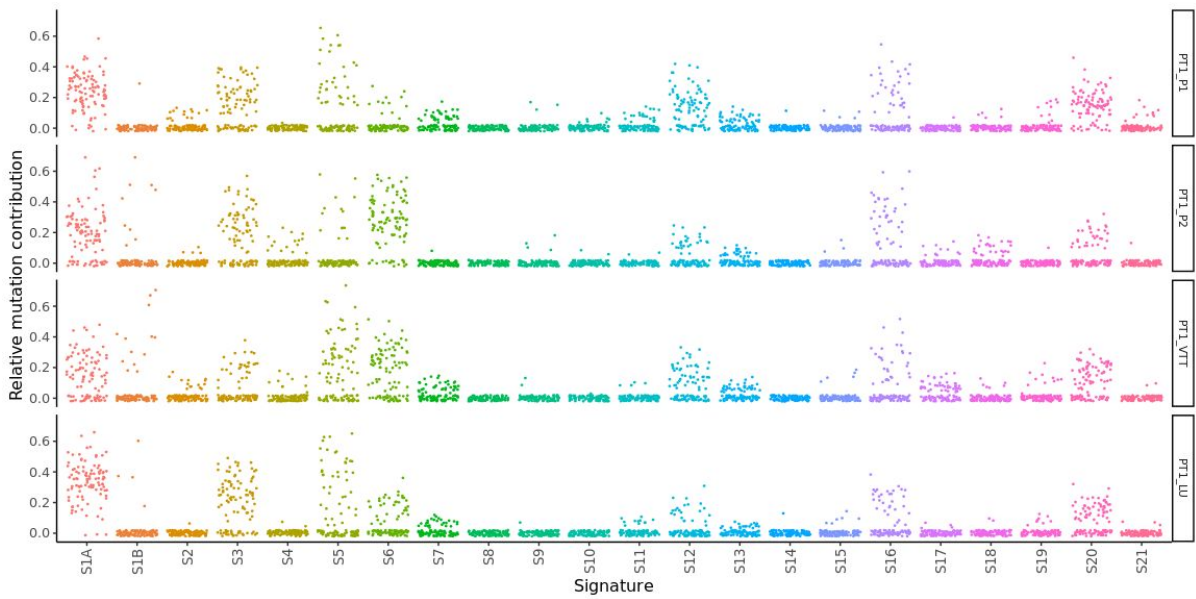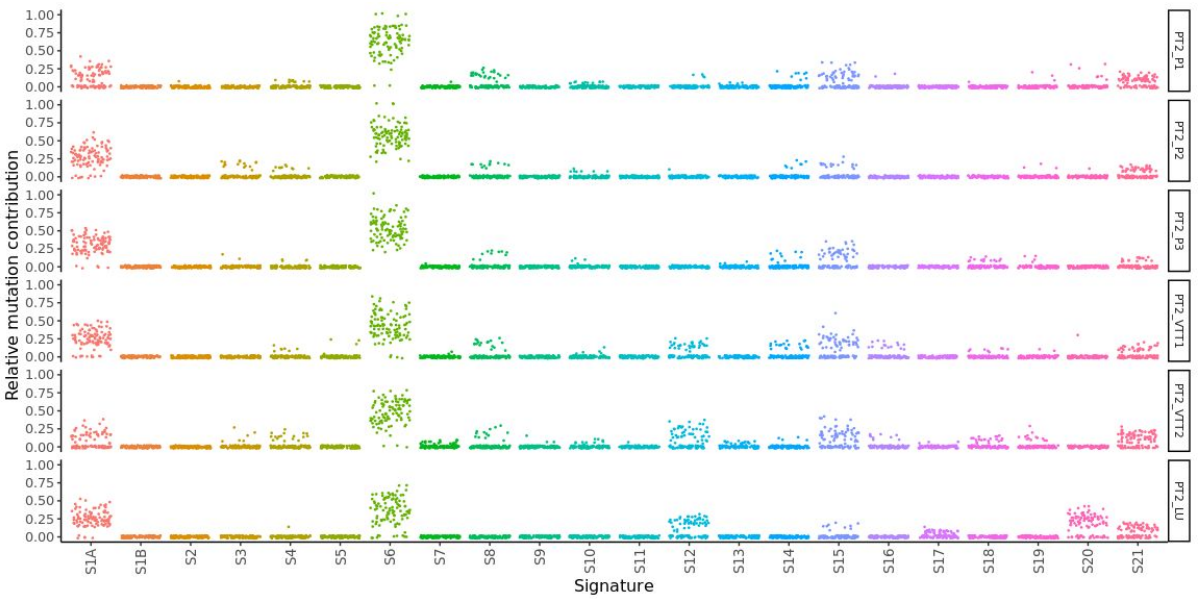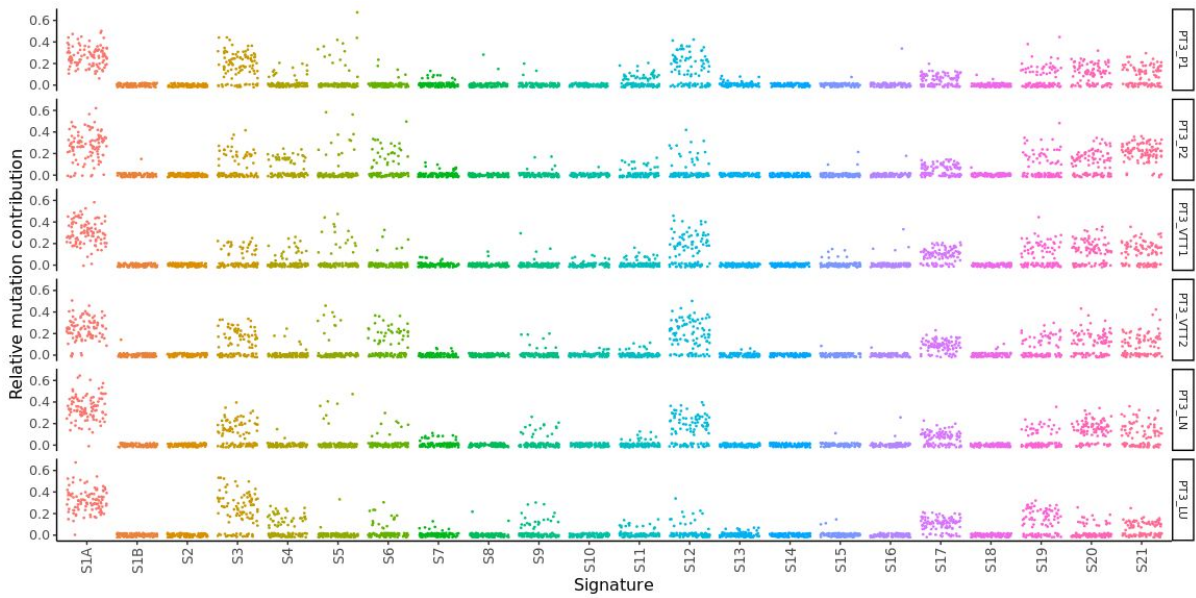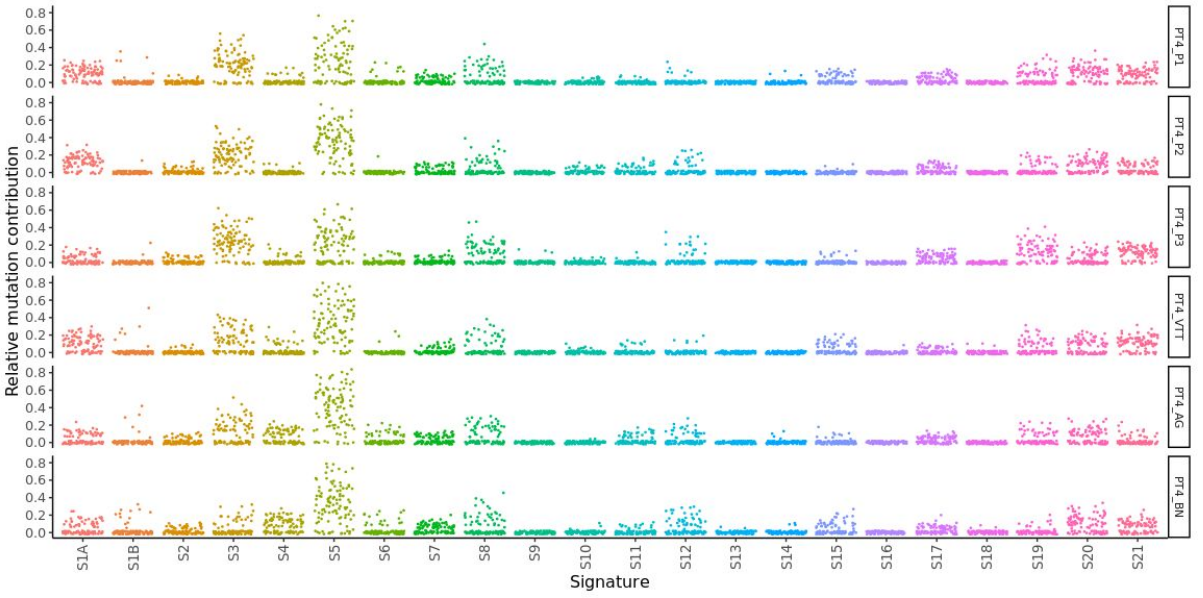

Figure S23.

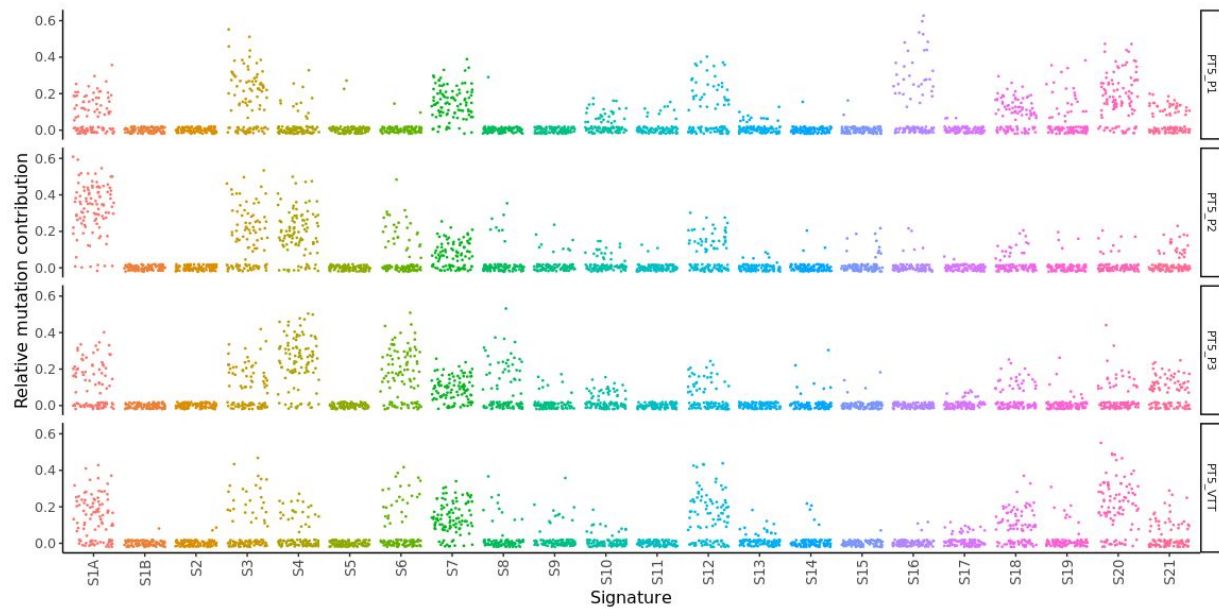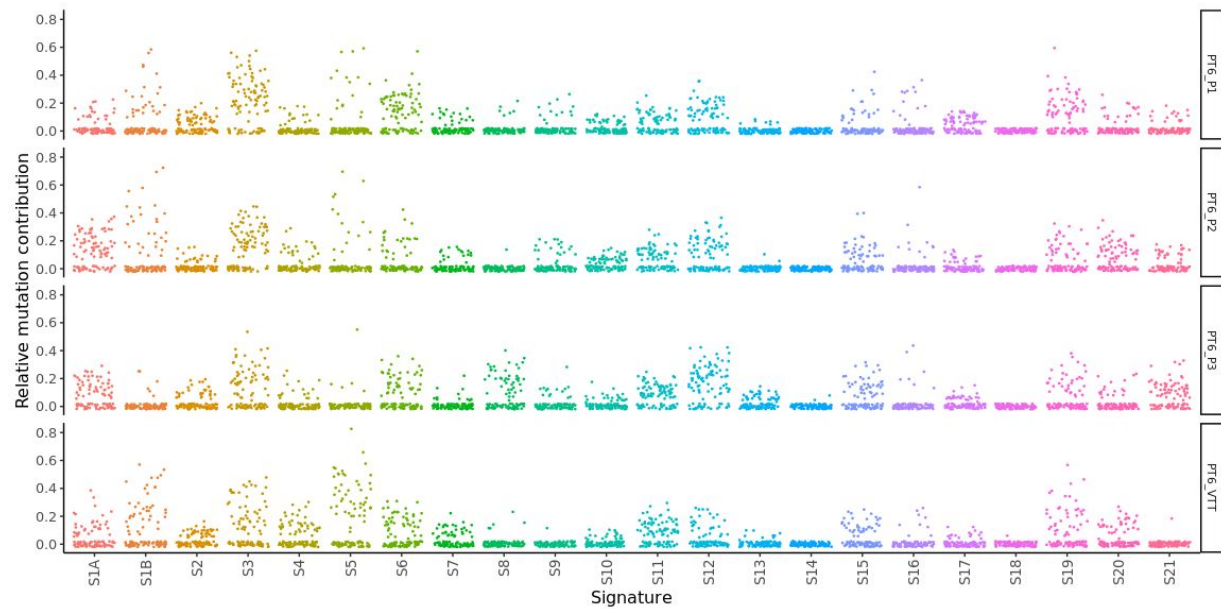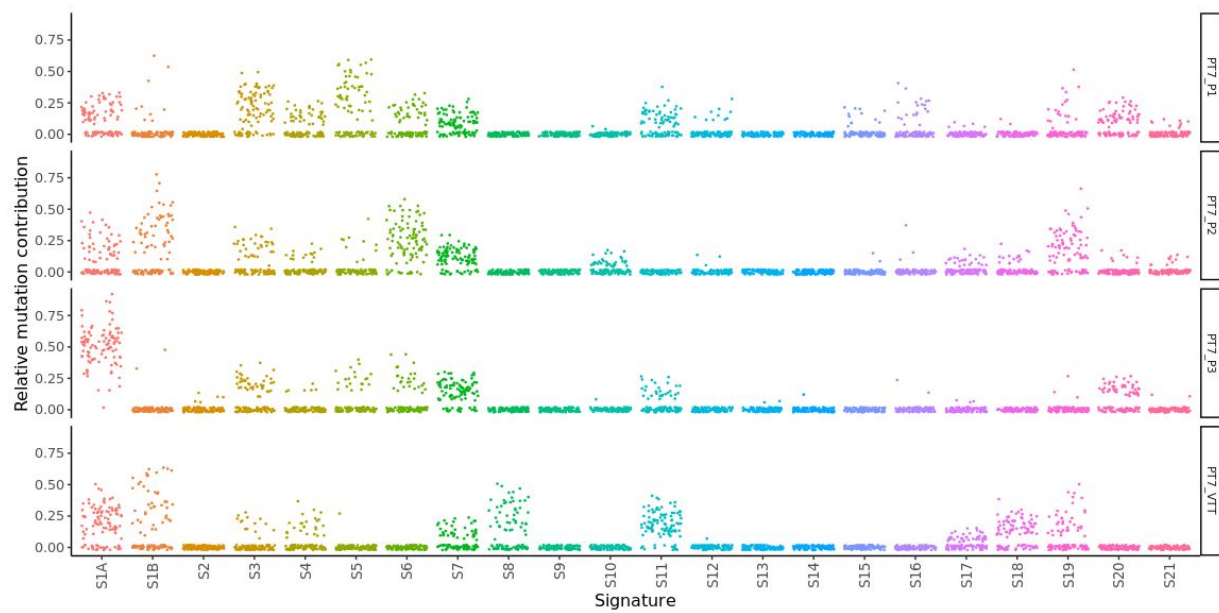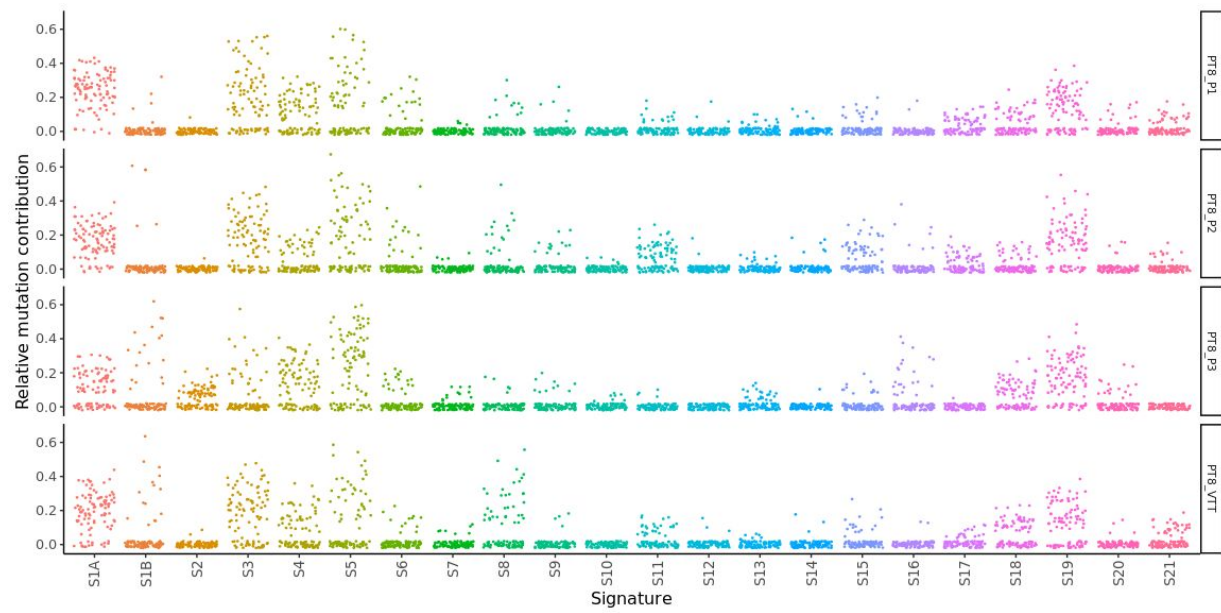



Figure S23.

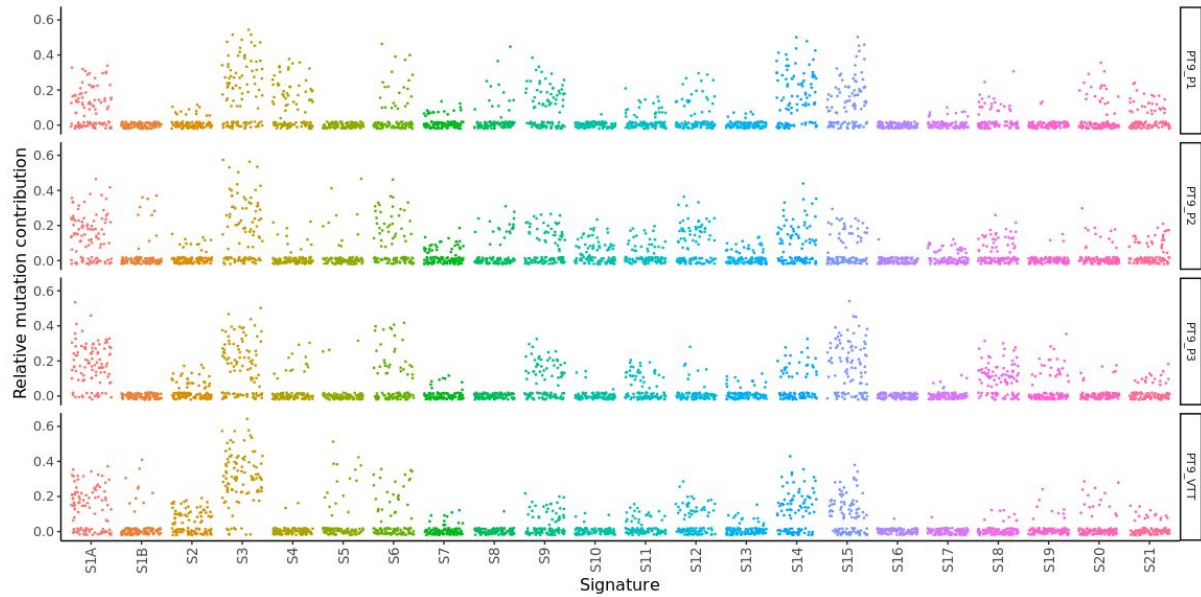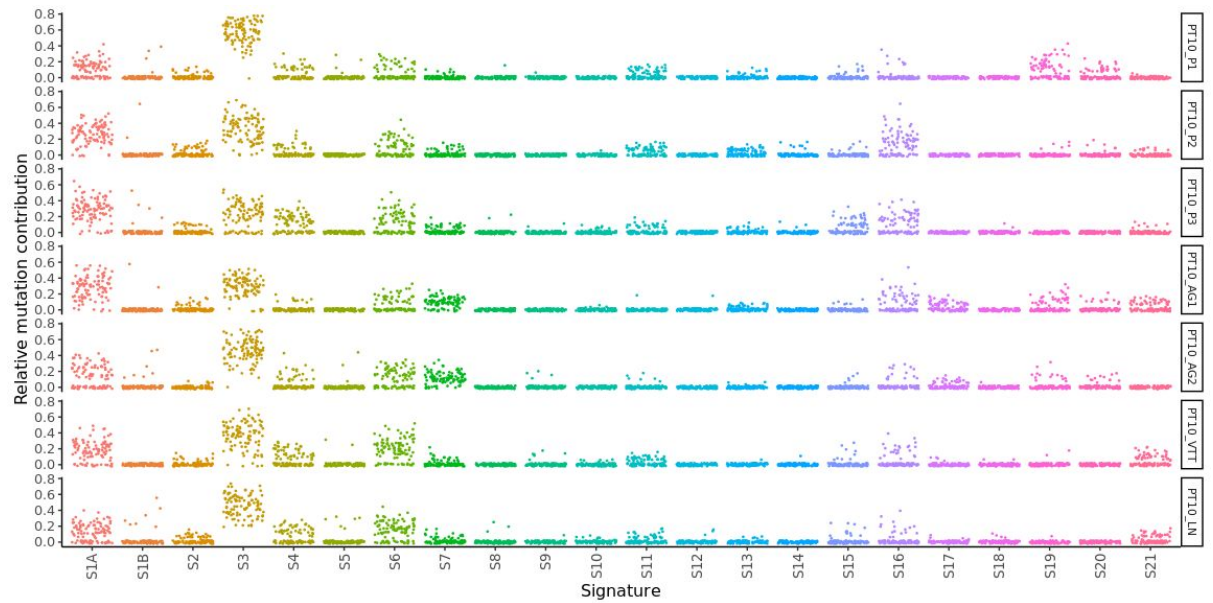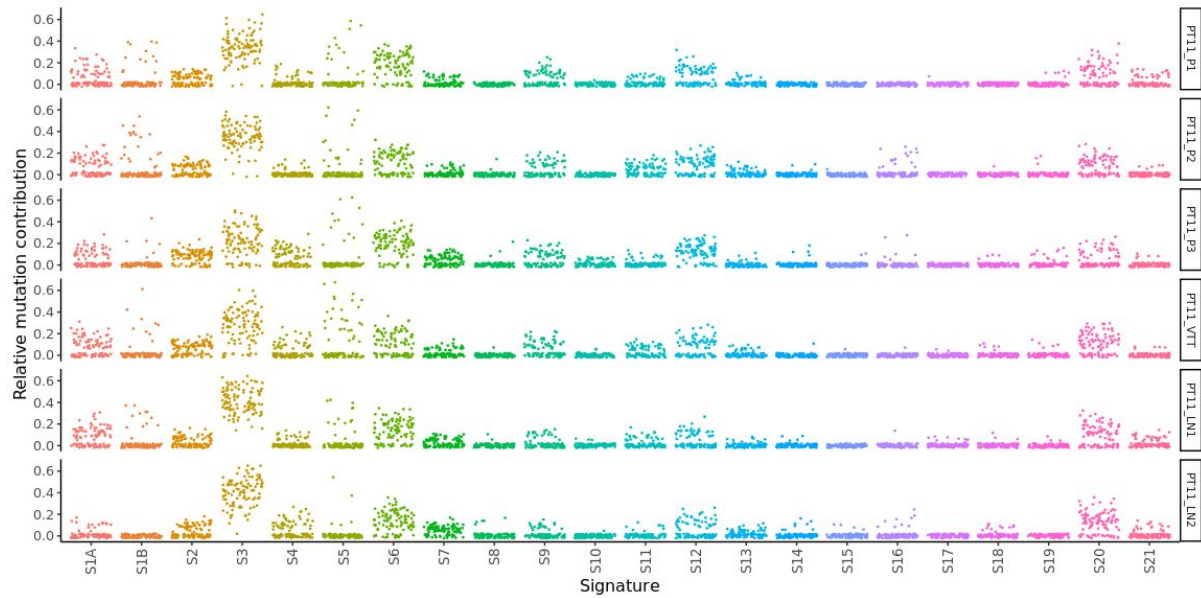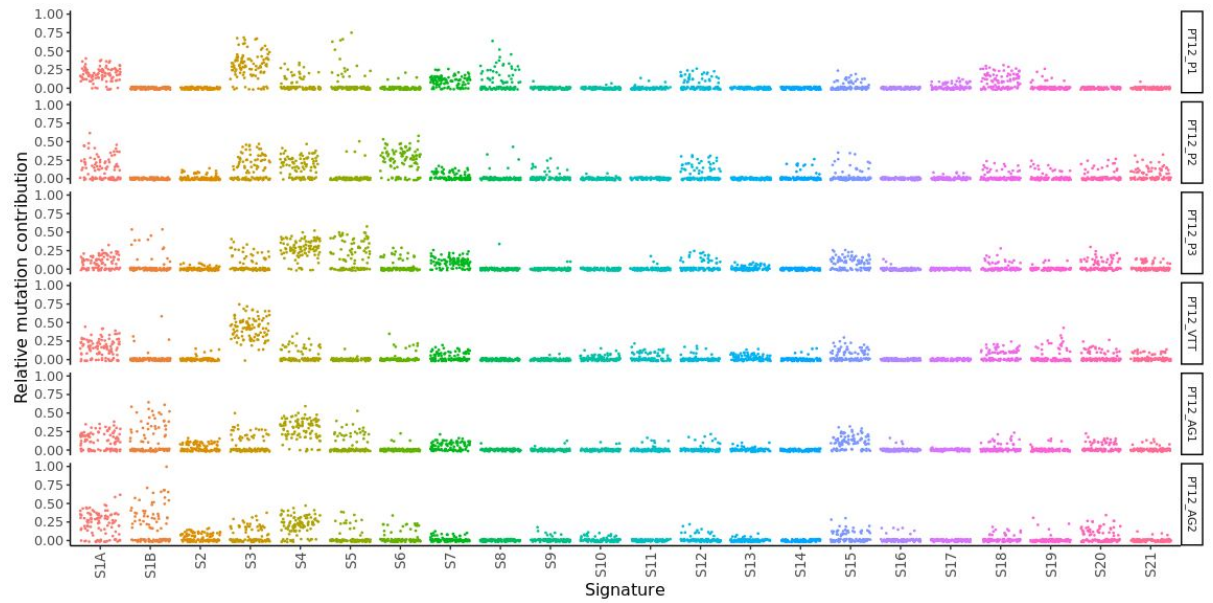

Figure S23.

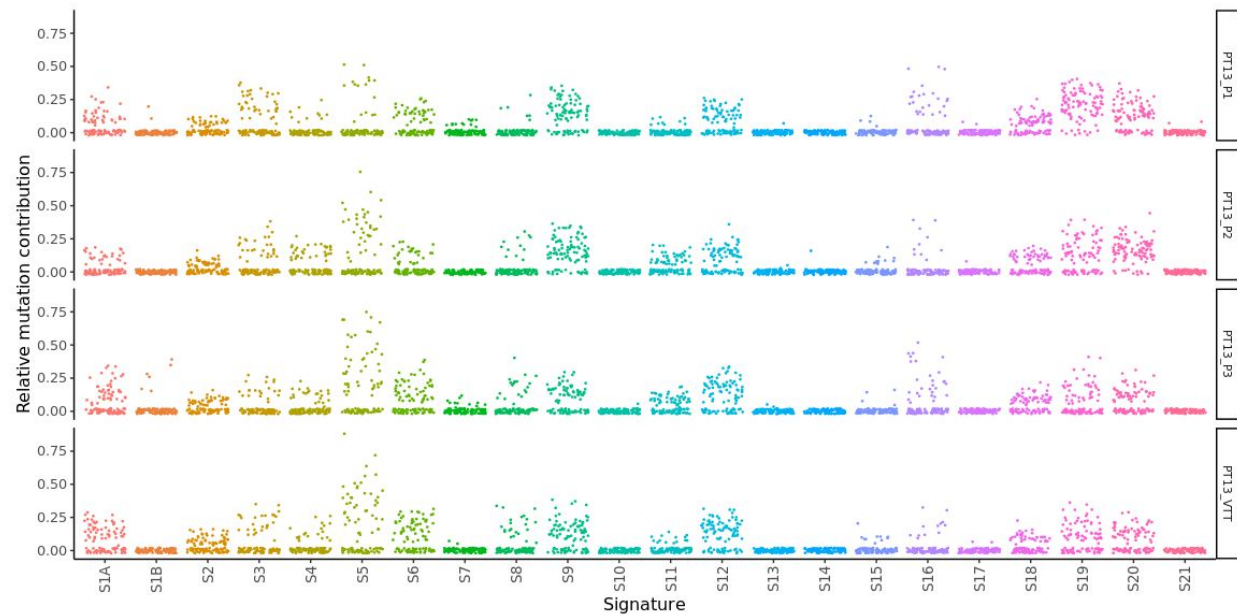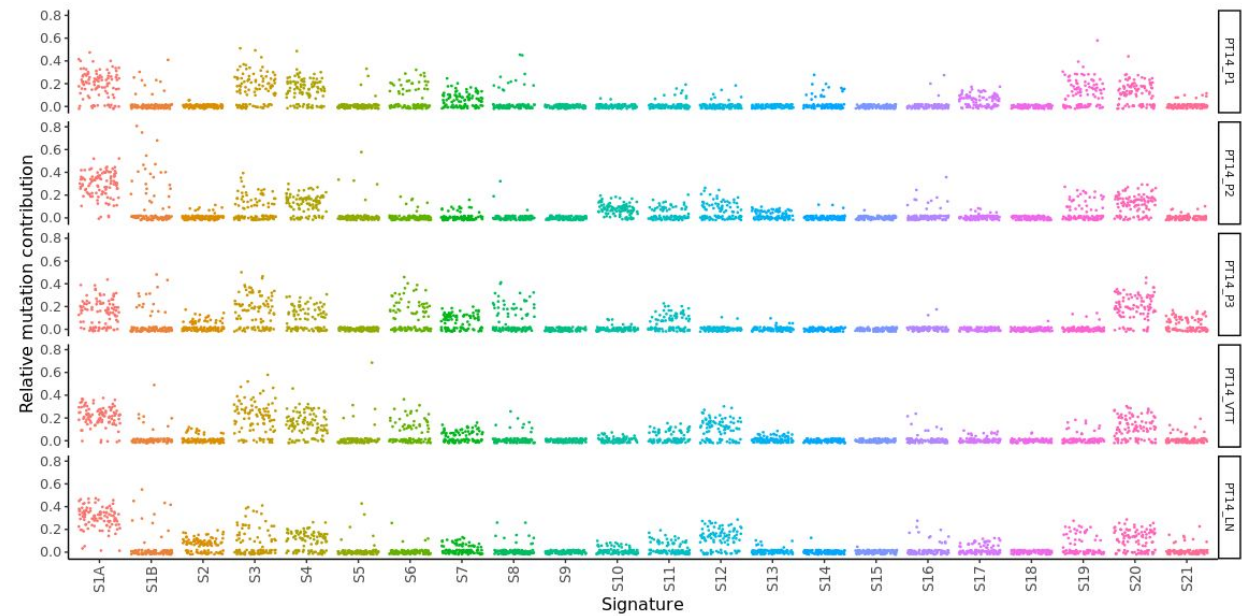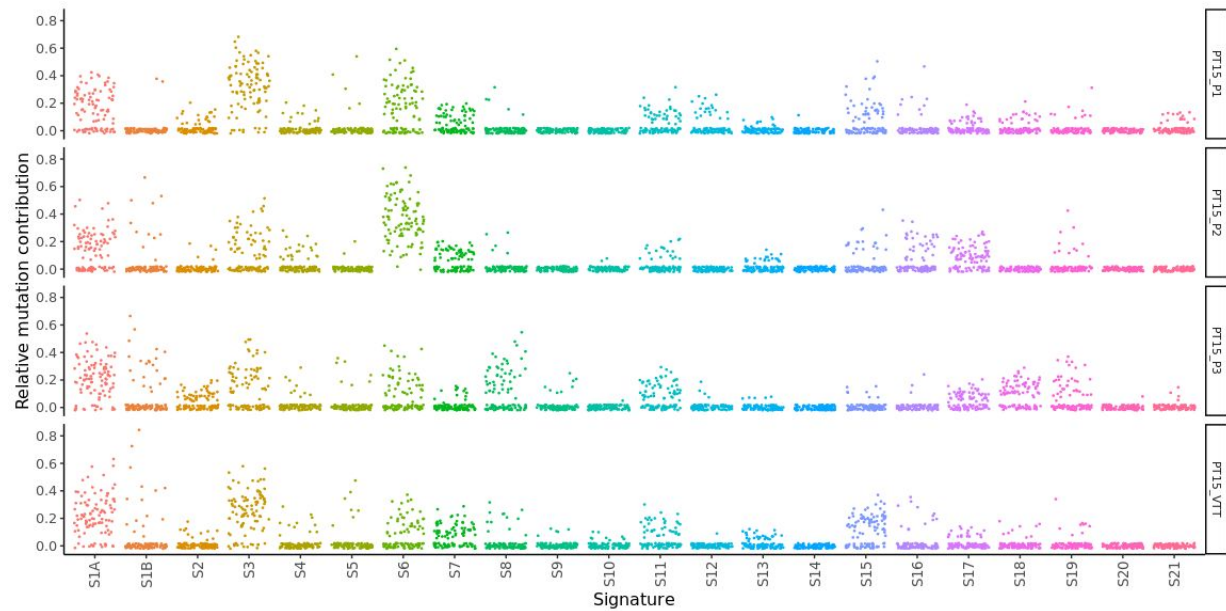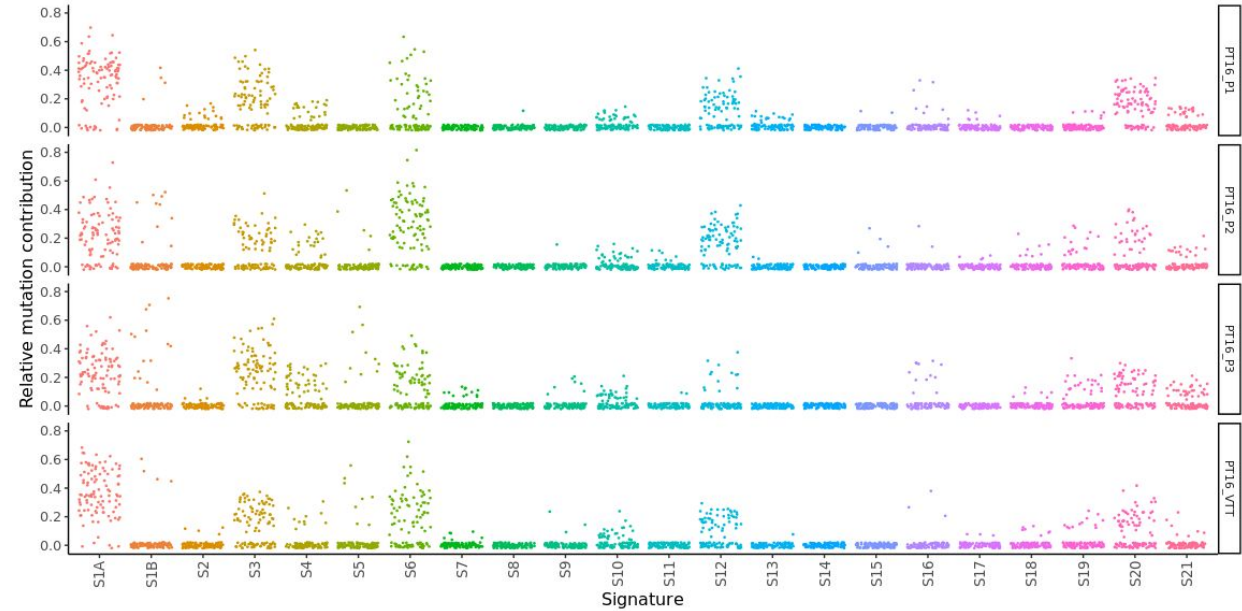

**Figure S23.** Relative contribution of the 22 original Alexandrov mutation signatures (36) to each sample, for all 100 bootstrap replicates.



# Figure S24.

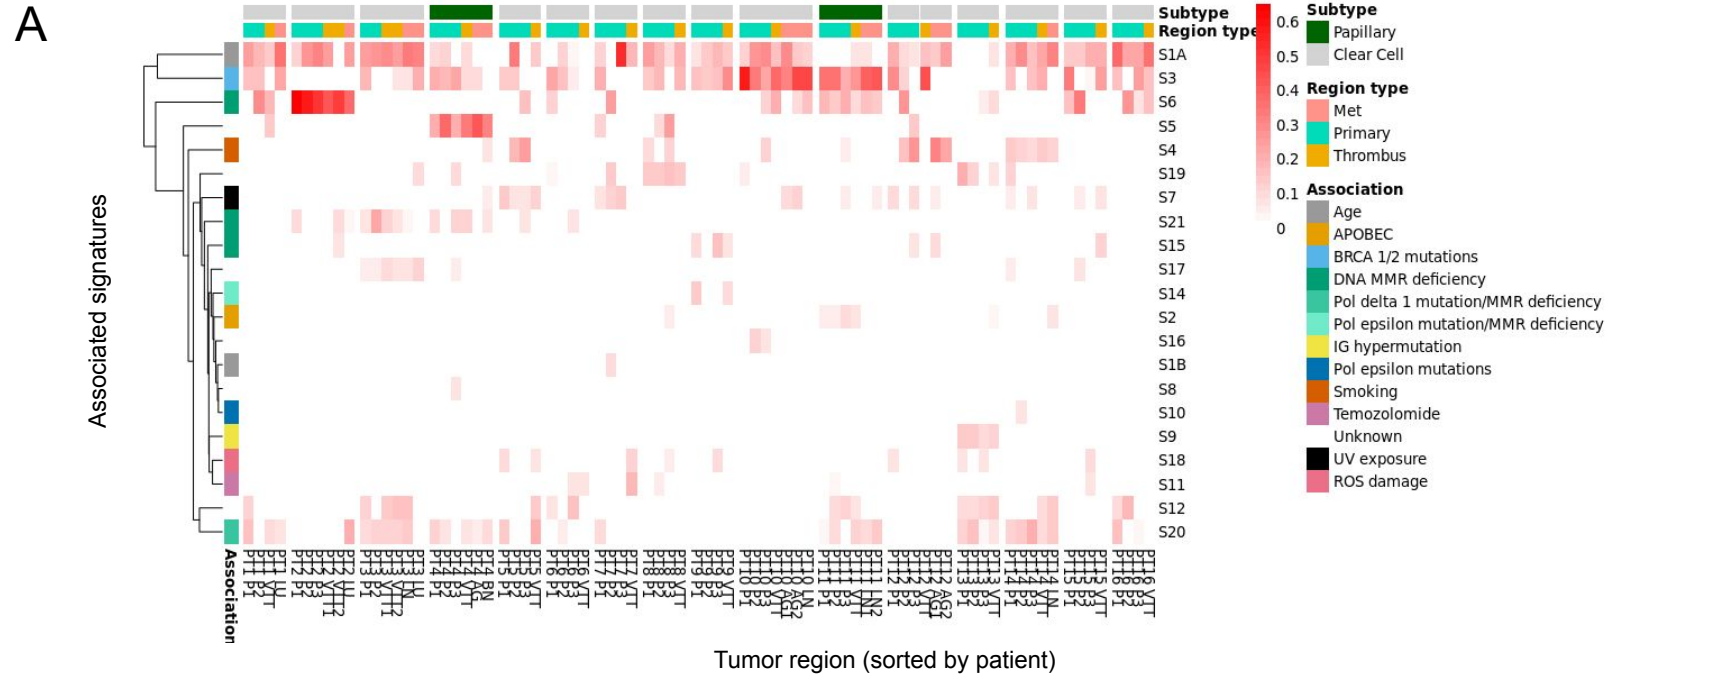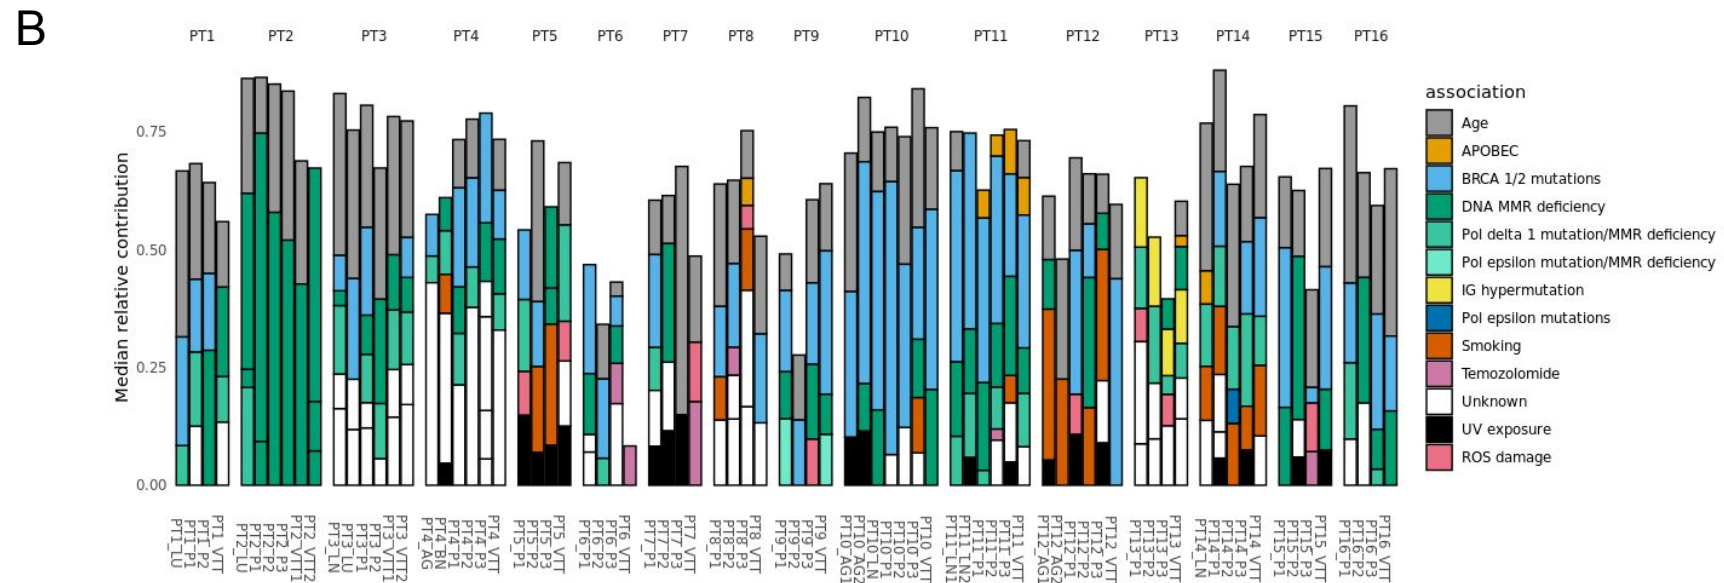

**Figure S24.** Median mutation signature contributions of 22 mutation signatures (36) shown as a) a heatmap of median relative contributions for all signatures with a non-zero median contribution to at least one sample and b) a bar plot showing the median relative contributions for all signatures with a non-zero value for a given sample

**Figure S25.**

**A**

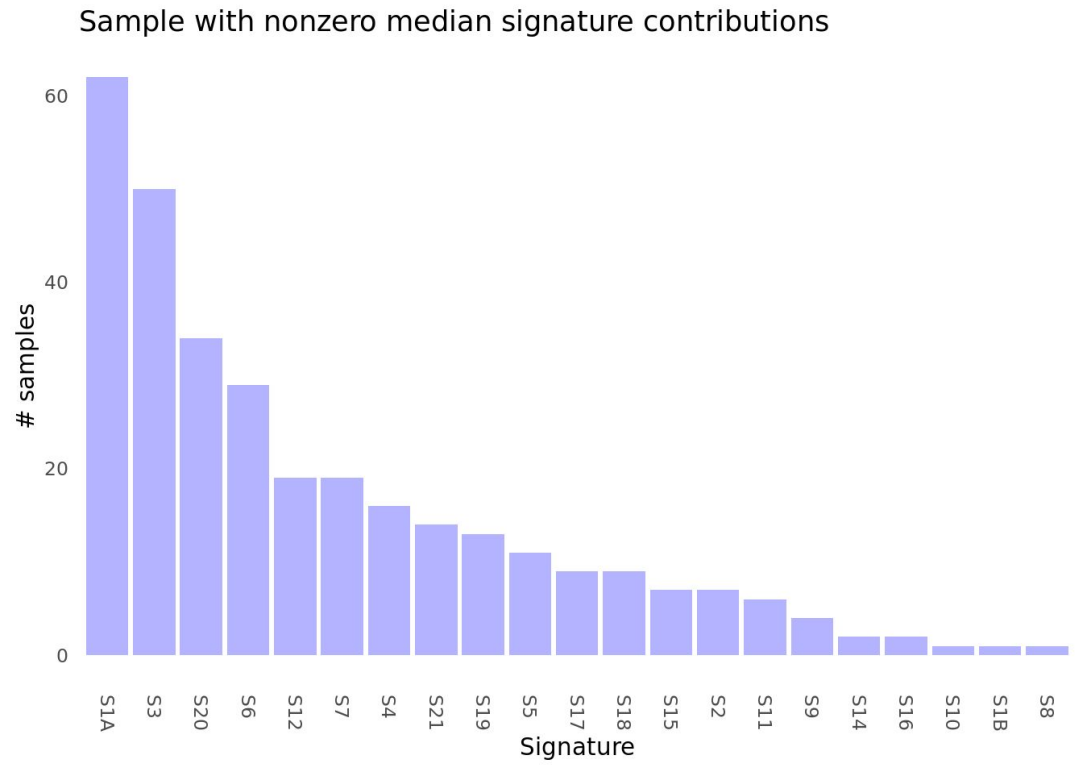

**B**

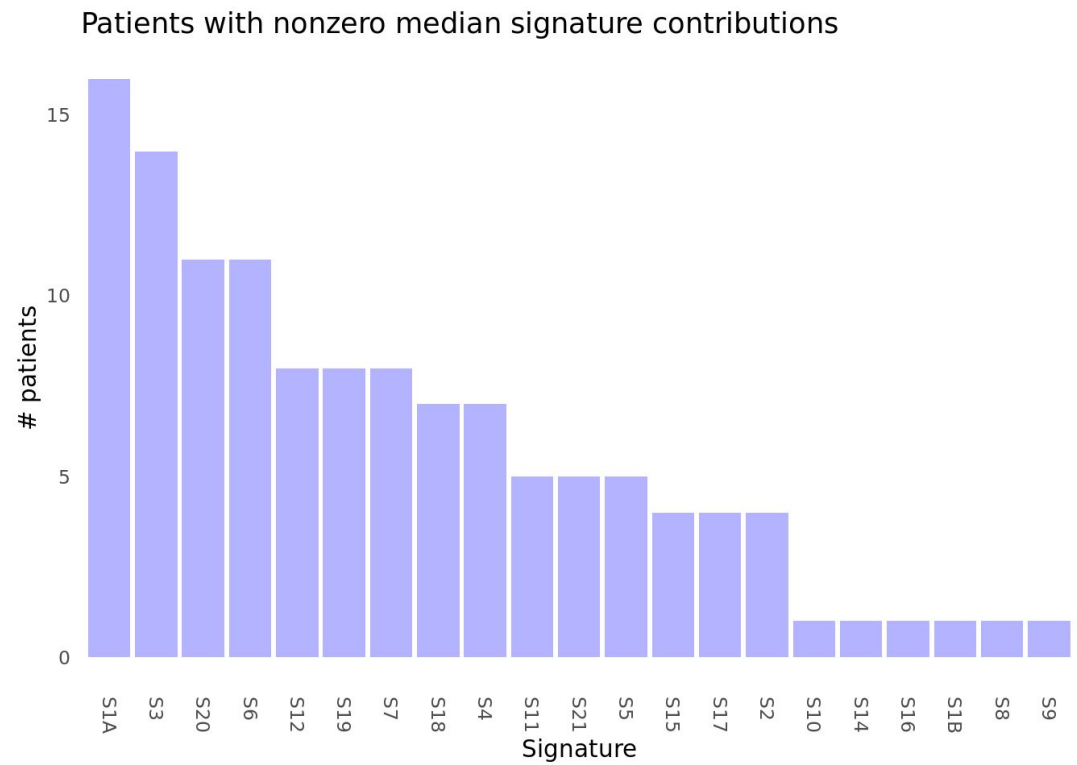

**Figure S25.** Number of a) samples and b) patients in whom a given mutation signature (36) has a non-zero median contribution over 100 bootstrap replicates.

Figure S26.

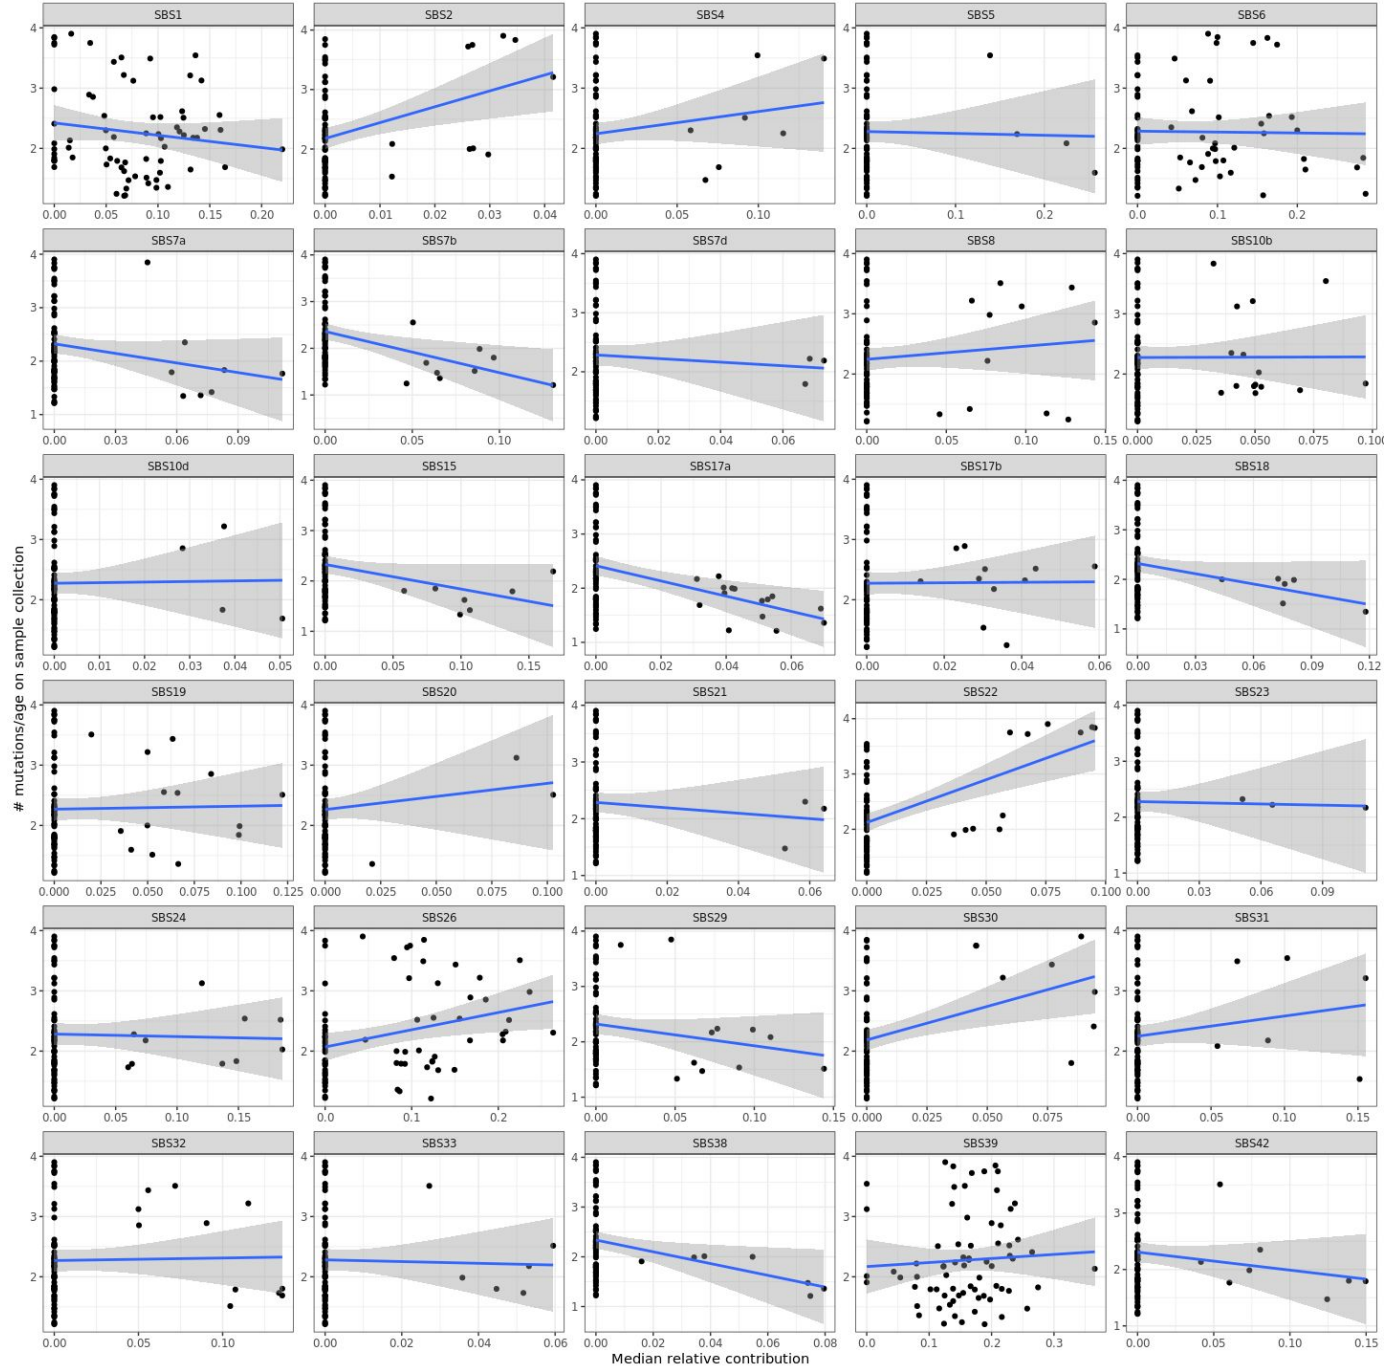



**Figure S26.** Relationship between the ratio of mutation burden and age and median relative contribution of different mutation signatures. 49 signatures (37) were assessed -- only those with a non-zero median relative contribution in  $> 1$  patient and  $> 2$  samples were plotted.

Figure S27.

A

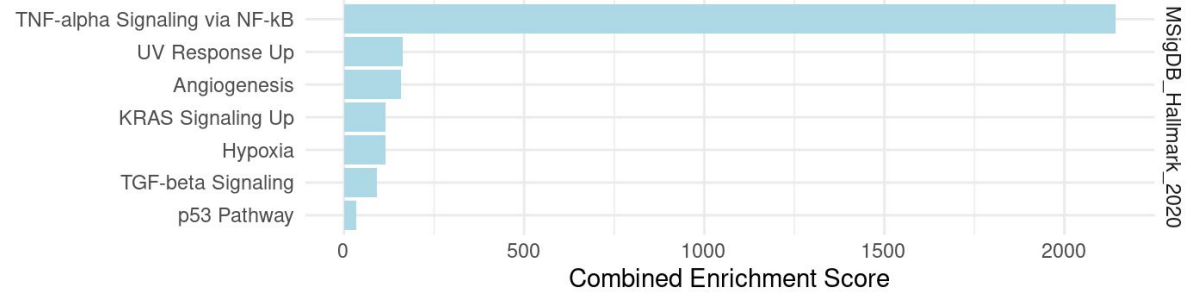

B

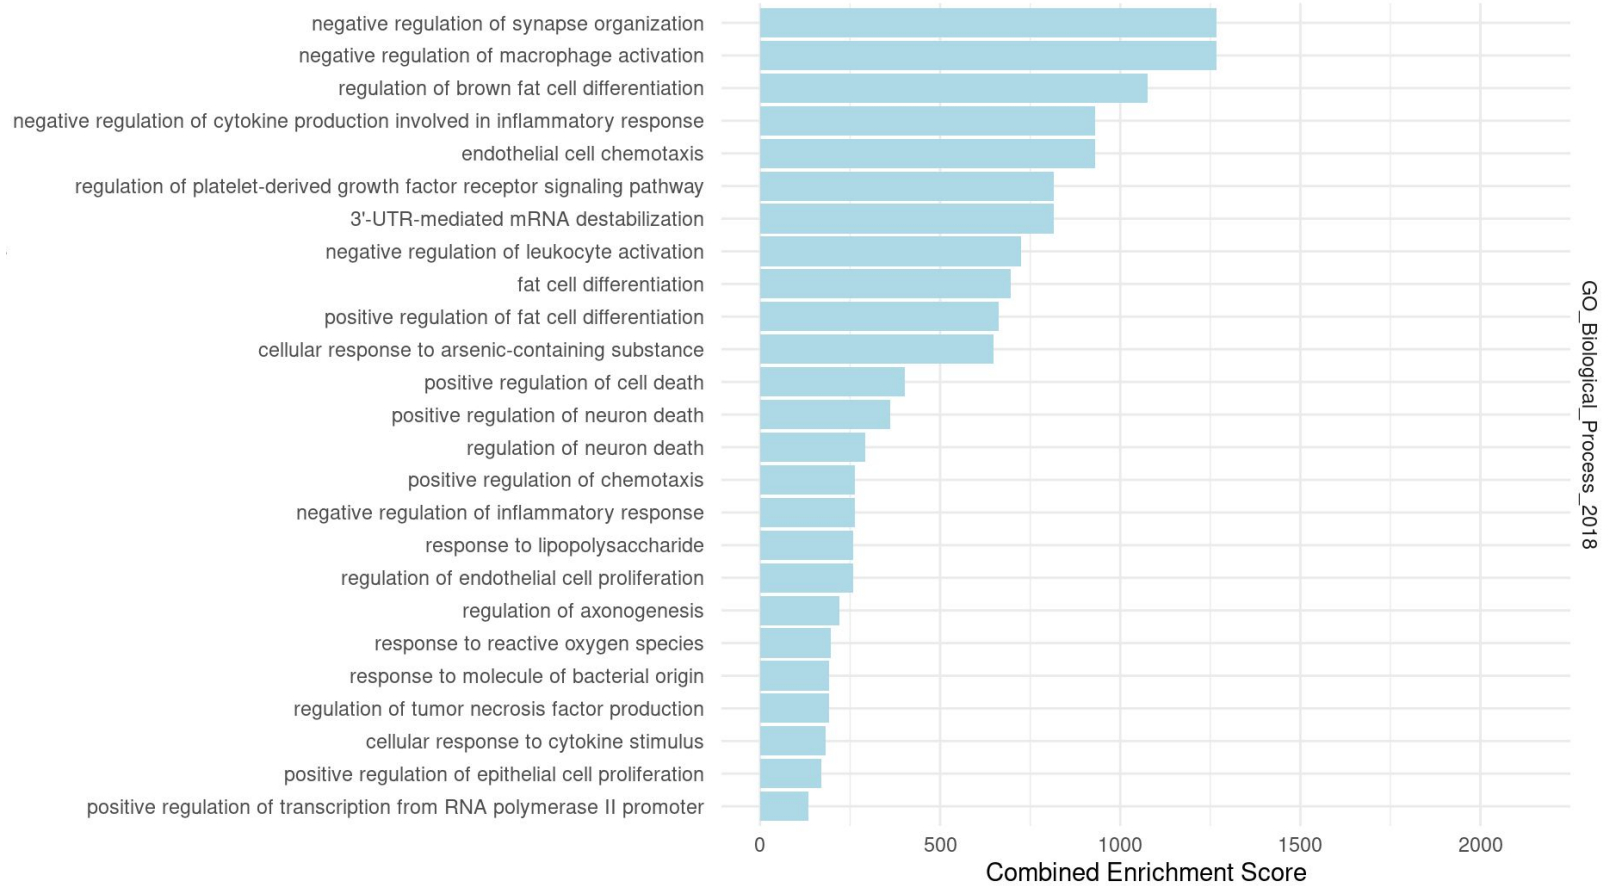

**Figure S27.** Enrichr set enrichment of differentially expressed genes between primary and VTT regions. (A) Significantly enriched terms from MSigDB Hallmark pathways. (B) Significantly enriched terms from GO Biological Processes. Significance is defined as adjusted P-value  $\leq 0.05$ .

Figure S28.

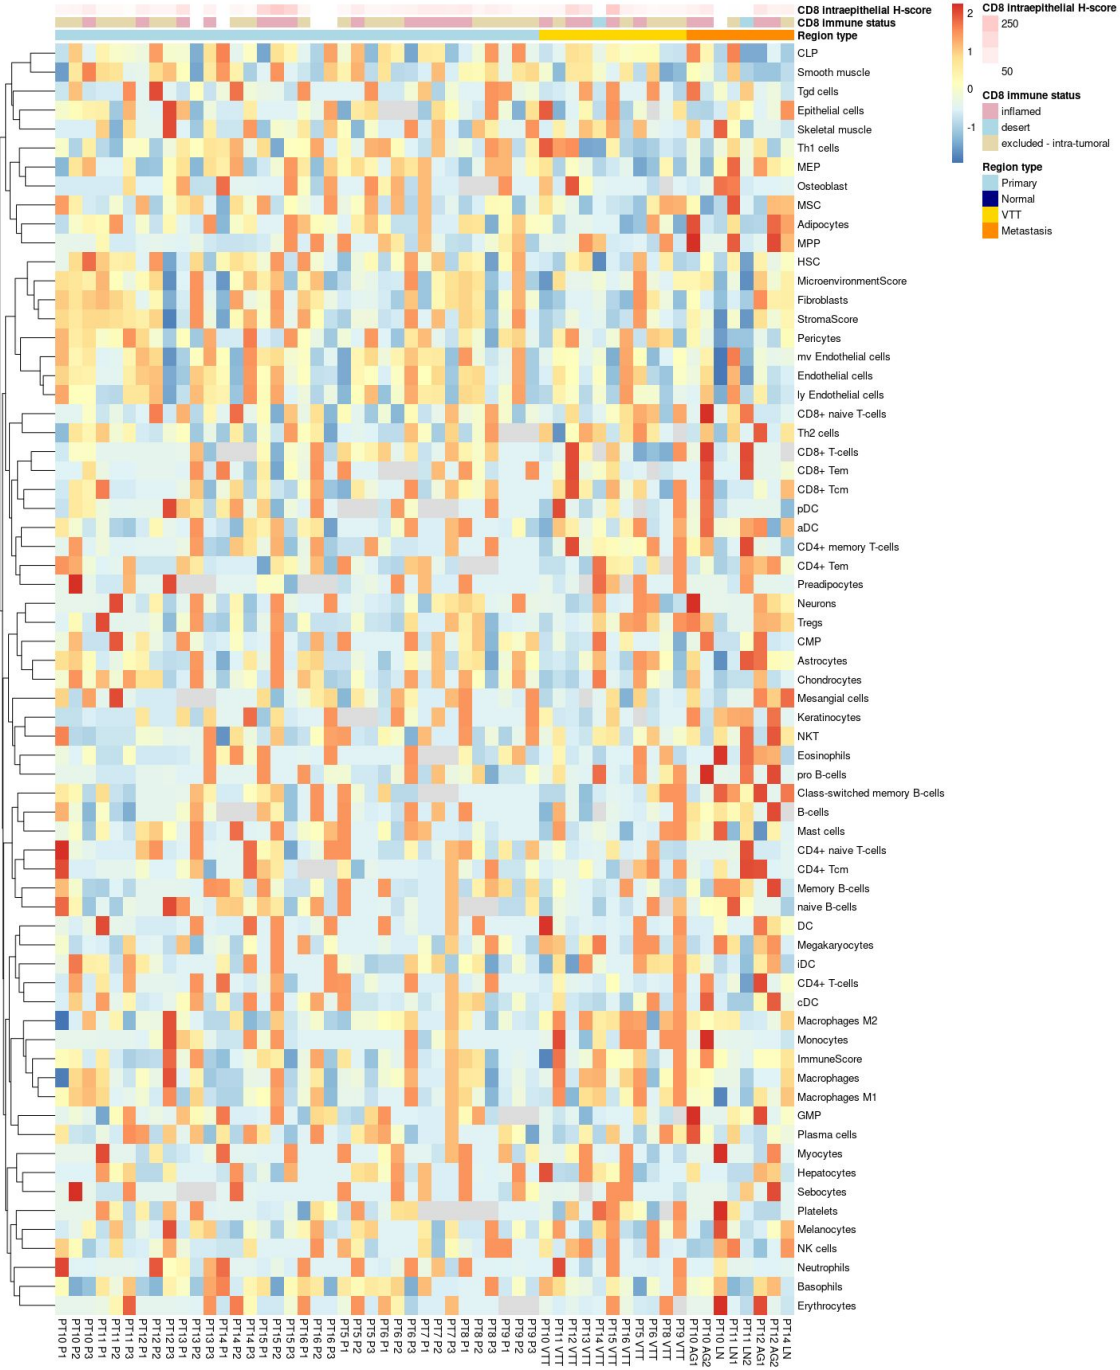

**Figure S28.** xCell enrichment scores for 67 cell types across all regions of all patients. Scores were normalized within each cell type and patient prior to visualization.

# Figure S29.

A

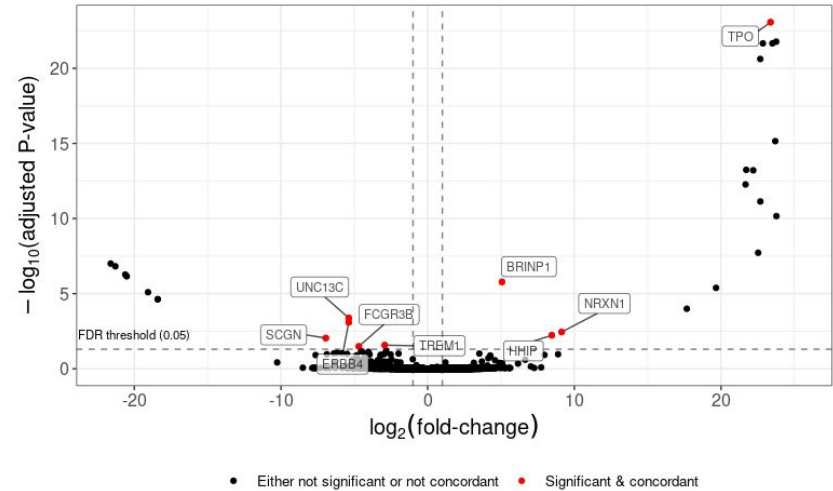

B

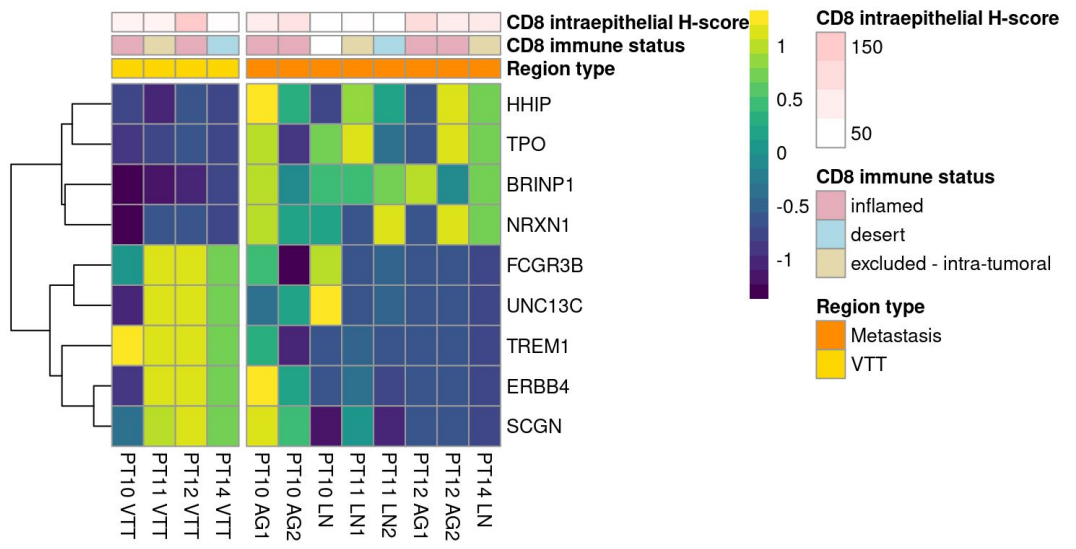

C

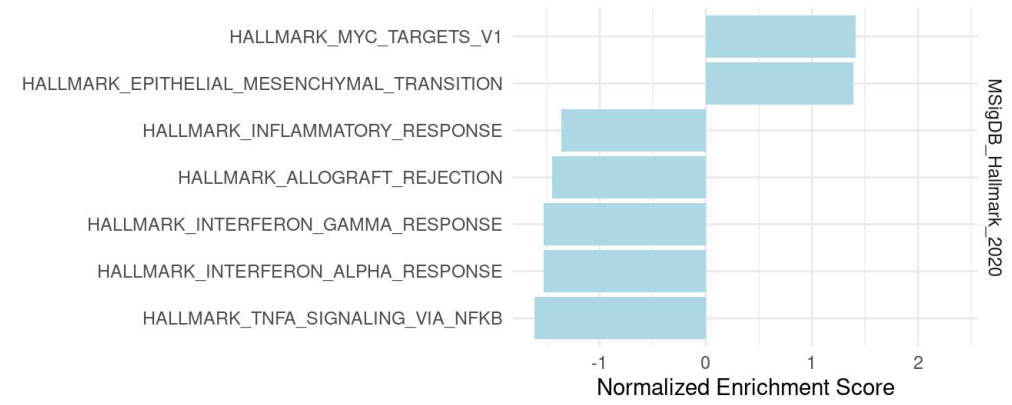

D

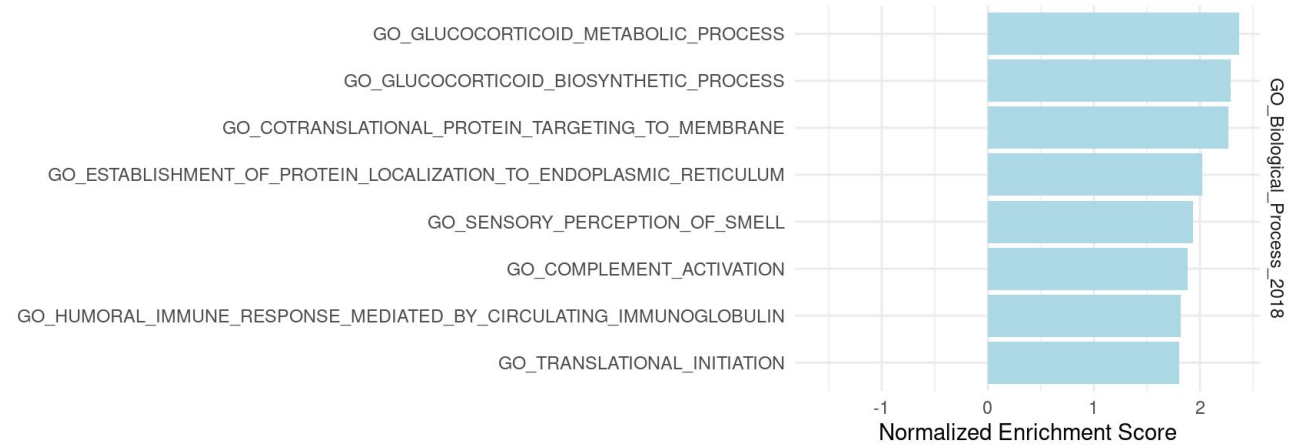

**Figure S29.** Differential expression between VTT and metastatic regions. (A) Volcano plot showing log-fold changes and adjusted P-values for differentially expressed genes. (B) Heatmap showing expression values of genes determined to be differential between VTT and metastatic regions. Expression values are normalized per gene and per patient. (C) Significantly enriched or depleted Hallmark pathways in metastases relative to VTT regions as determined by GSEA. (D) Significantly enriched GO Biological Process terms enriched or depleted in metastases relative to VTT regions as determined by GSEA. Significance is defined as adjusted p-value  $\leq 0.05$  (Benjamini-Hochberg).

# Figure S30.

A.

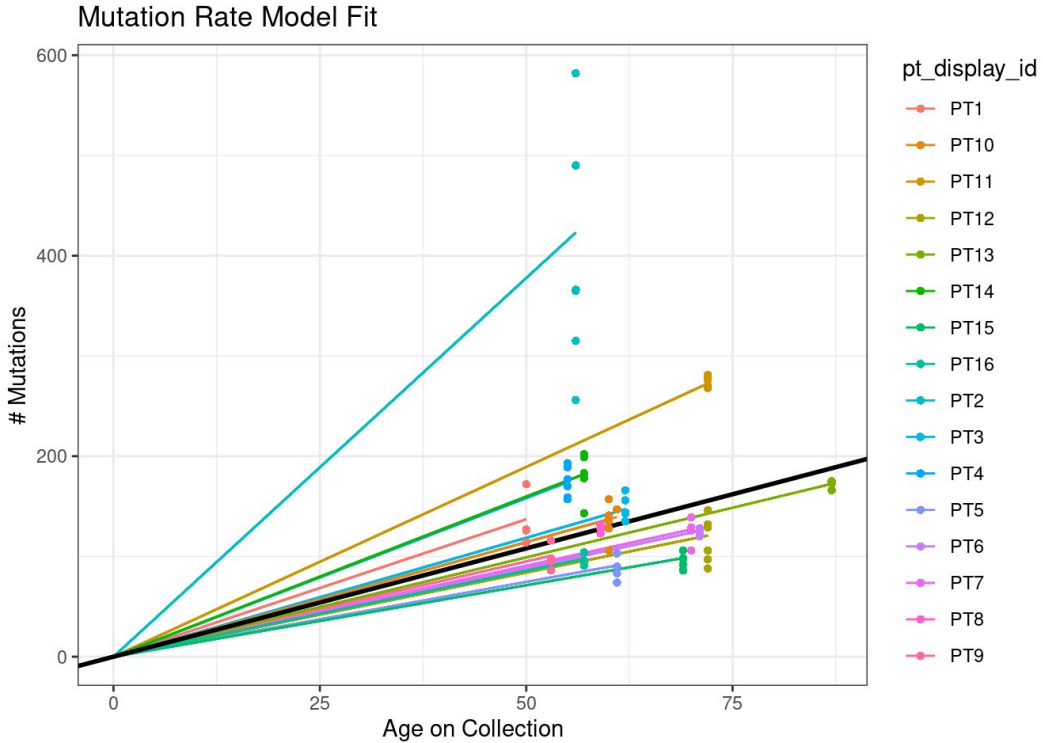

B.

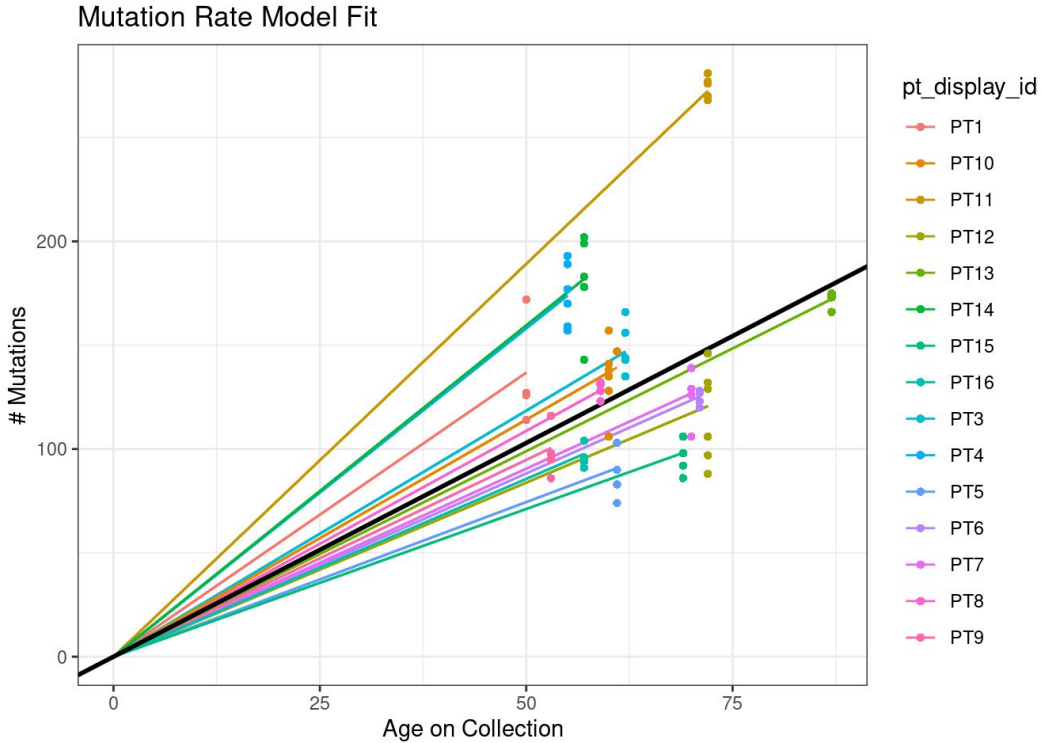



**Figure S30.** LME mutation rate model fits (A) with and (B) without PT2.
